# Supplementary material for: Construction of arylthio/arylamino methylene bonds by addition–elimination of nitroolefins with aromatic thiols and amines
Source: Royal Society of Chemistry journal article supplement (doi:10.1039/d4ob01330a), 2024-01-01
Supplement: d4ob01330a1.pdf [file d4ob01330a1.pdf]

## Construction of arylthio/arylamino methylene bonds by addition-elimination of nitroolefins with aromatic thiols and amines

Pooja Dahiya, Anoop Yadav, Rajnish Budhwan, Megha Rawat, and Rama Krishna Peddinti\*

*Department of Chemistry, Indian Institute of Technology Roorkee  
Roorkee-247 667, Uttarakhand, India*

---

### SUPPORTING INFORMATION

---

#### Table of contents

|                                                                 |         |
|-----------------------------------------------------------------|---------|
| General Information                                             | S2      |
| General procedure for the synthesis of <b>3a-3p</b>             | S3      |
| General procedure for the synthesis of <b>5a-5v</b>             | S3      |
| Characterization data of <b>3a-3p</b>                           | S3–S8   |
| Characterization data of <b>5a-5v</b>                           | S8–S15  |
| Copies of NMR spectra of <b>3a-3p</b>                           | S16–S32 |
| Copies of NMR spectra of <b>5a-5v</b>                           | S33–S53 |
| The ORTEP plot and crystallographic data for compound <b>3d</b> | S54     |
| The ORTEP plot and crystallographic data for compound <b>3j</b> | S55     |
| The ORTEP plot and crystallographic data for compound <b>5h</b> | S56     |
| The ORTEP plot and crystallographic data for compound <b>5i</b> | S57     |
| DFT calculation of <b>3d</b> and <b>3j</b>                      | S58–S67 |
| DFT calculation of <b>5h</b> and <b>5i</b>                      | S68–S76 |

**General information:**

Unless otherwise noted, chemicals were purchased from commercial suppliers at the highest purity grade available and were used without further purification. The isatin nitroolefin derivatives **2b**, **2c**, **2d** were synthesized by literature methods.<sup>24</sup> Thin layer chromatography was performed on pre-coated 0.25 mm silica gel plates (60F-254) using UV light as visualizing agent. Silica gel (100–200 mesh) was used for column chromatography. NMR spectra were recorded in CDCl<sub>3</sub> and/or DMSO-*d*<sub>6</sub> using TMS as an internal standard on 500 MHz and instrument. Chemical shifts ( $\delta$ ) were reported as parts per million (ppm) in  $\delta$  scale downfield from TMS. <sup>1</sup>H NMR spectra were referenced to CDCl<sub>3</sub> (7.26 ppm) and <sup>13</sup>C NMR spectra were referenced to CDCl<sub>3</sub> (77.0 ppm, the middle peak). Coupling constants were expressed in Hz. The following abbreviations were used to explain the multiplicities: s = singlet, d = doublet, t = triplet, q = quartet, dd = doublet of doublets, dt = doublet of triplets, m = multiplet. High-resolution mass spectra (HRMS) were obtained on an Agilent 1290-6545XT LC QTOF instrument using ESI technique.

## General procedures:

### General procedure for the synthesis of 3a-3p:

Nitroolefin **2** (0.1 mmol) and thiophenol **1** (0.12 mmol) were taken in a 10 mL-RB. 1 mL of methanol was added in the reaction mixture and stirred until the completion of the reaction. Yellow solid was precipitated out within 1–10 minutes which is filtered and washed with a few drops of cold methanol and dried in vacuum.

### General procedure for the synthesis of 5a-5v:

Nitroolefin **2** (0.1mmol) and aniline **4** (0.12 mmol) were taken in a 10 mL RB. 1 mL of methanol was added in the reaction mixture and stirred until the completion of the reaction. Yellow solid was precipitated out within 1-10 minutes which is filtered and washed with few drops of methanol and dried in vacuum.

### Characterization data:

#### (Z)-2-(Nitromethylene)acenaphthylen-1(2H)-one (2a)

Yield: 13.7 gm (61%) as Yellow solid; MP: 132 –134 °C.

<sup>1</sup>H NMR (CDCl<sub>3</sub>, 500 MHz): δ 8.78 (d, *J* = 7.4 Hz, 1H), 8.20 (dd, *J* = 8.2, 0.7 Hz, 1H), 8.14–8.10 (m, 2H), 7.85 (s, 1H), 7.81 (ddd, *J* = 8.4, 7.2, 1.2 Hz, 2 H) ppm.

<sup>13</sup>C NMR (CDCl<sub>3</sub>, 125 MHz): δ 190.9, 144.2, 137.4, 135.2, 132.4, 130.8, 130.27, 130.23, 129.2, 129.1, 129.0, 128.4, 128.4, 127.9, 127.4, 123.1 ppm.

HRMS (ESI): *m/z* calcd for C<sub>13</sub>H<sub>8</sub>NO<sub>3</sub> [M + H]<sup>+</sup> 226.0499; found; 226.0509.

#### (E)-2-((Phenylthio)methylene)acenaphthylen-1(2H)-one (3a)

Yield: 25 mg (87%) as Yellow solid; MP: 130–132 °C.

<sup>1</sup>H NMR (CDCl<sub>3</sub>, 500 MHz): δ 8.76 (d, 2H, *J* = 7.4 Hz), 8.21–8.10 (m, 5H), 7.84 (s, 1H), 7.81 (ddd, 4H, *J* = 8.2, 7.3, 3.8 Hz) ppm.

<sup>13</sup>C NMR (CDCl<sub>3</sub>, 125 MHz): δ 190.8, 144.1, 137.3, 135.1, 132.4, 130.8, 130.2, 130.2, 130.2, 130.2, 130.2, 130.1, 130.1, 129.0, 128.4, 127.8, 127.4, 123.0 ppm.

HRMS (ESI): *m/z* calcd for C<sub>19</sub>H<sub>13</sub>OS [M + H]<sup>+</sup> : 289.0682; found; 289.0686.

#### (E)-2-((p-Tolythio)methylene)acenaphthylen-1(2H)-one (3b)

Yield: 28 mg (93%) as Yellow solid; MP: 119–121 °C.

<sup>1</sup>H NMR (CDCl<sub>3</sub>, 500 MHz): δ 8.07 (d, 1H, *J* = 8.1 Hz), 8.01 (d, 1H, *J* = 7.0 Hz), 7.96 (d, 1H, *J* = 7.0 Hz), 7.9(s, 1H), 7.85 (d, 1H, *J* = 8.4 Hz), 7.71(dd, 2H, *J* = 15.3, 7.5 Hz), 7.62 (d, 1H, *J* = 7.6 Hz), 7.34–7.28 (m, 3H), 2.52 (s, 3H) ppm.

<sup>13</sup>C NMR (CDCl<sub>3</sub>, 125 MHz): δ 189.8, 139.8, 139.1, 138.4, 133.6, 133.1, 132.8, 132.7, 132.7, 132.7, 132.6, 131.3, 131.3, 131.3, 130.9, 130.8, 130.6, 130.4, 129.3, 128.5, 128.0, 127.3, 125.0, 121.8, 121.0, 21.0 ppm.

HRMS (ESI): *m/z* calcd for C<sub>20</sub>H<sub>15</sub>OS [M + H]<sup>+</sup>: 303.0844; found; 303.0850.

**(*E*)-2-(((4-Chlorophenyl)thio)methylene)acenaphthylen-1(2*H*)-one (3c)**

Yield: 30 mg (93%) as Yellow solid; MP: 193–195 °C.

<sup>1</sup>H NMR (CDCl<sub>3</sub>, 500 MHz): δ 8.08 (d, 1H, *J* = 8.2 Hz), 8.02–8.00 (m, 1H), 7.92 (s, 1H), 7.87 (dd, 2H, *J* = 13.0, 7.6 Hz), 7.71 (ddd, 2H, *J* = 16.6, 8.2, 7.0 Hz), 7.55(d, 2H, *J* = 8.6 Hz), 7.42 (d, 2H, *J* = 8.6 Hz) ppm.

<sup>13</sup>C NMR (CDCl<sub>3</sub>, 125 MHz): δ 193.9, 138.7, 135.4, 134.87, 134.80, 134.2, 131.1, 130.1, 129.8, 128.6, 128.3, 127.8, 122.7, 121.5, 117.1, 113.5, 109.7 ppm.

HRMS (ESI): *m/z* calcd for C<sub>19</sub>H<sub>12</sub>ClOS [M + H]<sup>+</sup>: 323.0297; found: 323.0255.

**(*E*)-2-(((2-Chlorophenyl)thio)methylene)acenaphthylen-1(2*H*)-one (3d)**

Yield: 30 mg (93%) as Yellow solid; MP: 130–132 °C.

IR (neat): 1705, 1587, 1498, 1437, 1305, 1254, 1174, 1106, 1032, 926, 841, 805, 730, 653, 567, 479 cm<sup>-1</sup>

<sup>1</sup>H NMR (CDCl<sub>3</sub>, 500 MHz): δ 8.09 (d, 1H, *J* = 8.1 Hz), 8.02 (d, 1H, *J* = 7.0 Hz), 7.98 (d, 1H, *J* = 7.0 Hz), 7.93 (s, 1H), 7.87 (d, 1H, *J* = 8.4 Hz), 7.74–7.67 (m, 3H), 7.52–7.50 (m, 1H), 7.40–7.32 (m, 2H) ppm.

<sup>13</sup>C NMR (CDCl<sub>3</sub>, 125 MHz): δ 189.8, 139.4, 135.4, 135.1, 133.2, 132.9, 132.2, 131.7, 131.3, 130.4, 130.3, 129.8, 128.5, 128.1, 128.03, 128.02, 125.3, 121.9, 121.3 ppm.

HRMS (ESI): *m/z* calcd for C<sub>19</sub>H<sub>12</sub>ClOS [M + H]<sup>+</sup>: 323.0297; found : 323.0260.

**(*E*)-2-((Naphthalen-2-ylthio)methylene)acenaphthylen-1(2*H*)-one (3e)**

Yield: 30 mg (89%) as Yellow solid; MP: 142–144 °C.

<sup>1</sup>H NMR (CDCl<sub>3</sub>, 500 MHz): δ 8.14 (s, 1H), 8.12–8.07 (m, 2H), 8.02 (dd, 1H, *J* = 7.0, 0.8 Hz), 7.96 (d, 1H, *J* = 7.1 Hz), 7.92 (d, 1H, *J* = 8.8 Hz), 7.88 (dd, 2H, *J* = 7.4, 2.9 Hz), 7.86 (s, 1H), 7.72 (dt, 2H, *J* = 8.6, 7.0 Hz), 7.66 (dd, 1H, *J* = 8.6, 2.1 Hz), 7.57–7.54 (m, 2H) ppm.

<sup>13</sup>C NMR (CDCl<sub>3</sub>, 125 MHz): δ 189.8, 139.1, 137.3, 133.6, 133.5, 133.0, 132.8, 131.2, 130.7, 130.3, 130.0, 129.5, 128.4, 128.0, 127.8, 127.7, 127.7, 127.1, 127.0, 125.0, 121.8, 120.9 ppm.

HRMS (ESI): *m/z* calcd for C<sub>23</sub>H<sub>15</sub>OS [M + H]<sup>+</sup> : 339.0844; found: 339.0810.

**(Z)-3-((Phenylthio)methylene)indolin-2-one (3f)**

Yield: 22 mg (87%) as Yellow solid; MP: 136–138 °C.

<sup>1</sup>H NMR (CDCl<sub>3</sub>, 500 MHz): δ 8.06 (s, 1H), 7.97 (s, 1H), 7.65 (d, 1H, *J* = 7.5 Hz), 7.59–7.57 (m, 2H), 7.42 (ddd, 3H, *J* = 8.9, 4.5, 2.9 Hz), 7.23 (td, 1H, *J* = 7.7, 1.1 Hz), 7.10 (td, 1H, *J* = 7.6, 0.9 Hz), 6.89 (d, 1H, *J* = 7.7 Hz) ppm.

<sup>13</sup>C NMR (CDCl<sub>3</sub>, 125 MHz): δ 167.5, 140.5, 140.0, 133.3, 131.1, 129.7, 128.9, 128.6, 124.0, 123.0, 122.7, 122.2, 109.7 ppm.

HRMS (ESI): *m/z* calcd for C<sub>15</sub>H<sub>12</sub>NOS [M + H]<sup>+</sup>: 254.0640; found: 254.0647.

**(Z)-3-(((4-Chlorophenyl)thio)methylene)indolin-2-one (3g)**

Yield: 27 mg (94%) as Yellow solid; MP: 179–181 °C.

<sup>1</sup>H NMR (CDCl<sub>3</sub>, 500 MHz): δ 8.44 (s, 1H), 7.87 (s, 1H), 7.63–7.60 (m, 1H), 7.53–7.49 (m, 2H), 7.40 (dt, 2H, *J* = 2.2, 1.6 Hz), 7.23 (dd, m, 1H, *J* = 7.8, 1.3 Hz), 7.09 (td, 1H, *J* = 7.7, 1.1 Hz), 6.91–6.89 (m, 1H) ppm.

<sup>13</sup>C NMR (CDCl<sub>3</sub>, 125 MHz): δ 167.6, 140.2, 139.2, 135.3, 132.4, 132.4, 132.4, 132.4, 131.7, 130.0, 129.9, 129.9, 129.9, 129.9, 128.9, 124.0, 123.7, 122.5, 122.3, 109.8 ppm.

HRMS (ESI): *m/z* calcd for C<sub>15</sub>H<sub>11</sub>NOCIS [M + H]<sup>+</sup>: 288.0250; found: 288.0234.

**(Z)-3-(((2-Chlorophenyl)thio)methylene)indolin-2-one (3h)**

Yield: 27 mg (94%) as Yellow solid; MP: 197–199 °C.

<sup>1</sup>H NMR (CDCl<sub>3</sub>, 500 MHz): δ 8.15 (s, 1H), 7.87 (s, 1H), 7.71 (d, 1H, *J* = 8.1 Hz), 7.66–7.63 (m, 1H), 7.53–7.48 (m, 1H), 7.38–7.33 (m, 2H), 7.24 (dd, 1H, *J* = 7.8, 1.1 Hz), 7.14–7.08 (m, 1H), 6.90 (d, 1H, *J* = 8.1 Hz) ppm.

<sup>13</sup>C NMR (CDCl<sub>3</sub>, 125 MHz): δ 167.5, 140.1, 138.1, 135.5, 132.5, 132.4, 130.4, 130.1, 128.9, 128.1, 128.0, 124.3, 124.2, 122.5, 122.4, 109.8 ppm.

HRMS (ESI): *m/z* calcd for C<sub>15</sub>H<sub>11</sub>ClNOS [M + H]<sup>+</sup>: 288.0250; found: 288.0250.

**(Z)-3-((Naphthalen-2-ylthio)methylene)indolin-2-one (3i)**

Yield: 27 mg (89%) as Yellow solid; MP: 196–198 °C.

<sup>1</sup>H NMR (CDCl<sub>3</sub>, 500 MHz): δ 8.09 (s, 1H), 8.08–8.07 (m, 1H), 7.99–7.98 (m, 1H), 7.90 (d, *J* = 8.8 Hz, 1H), 7.86 (m, 1H), 7.80–7.77 (m, 1H), 7.74–7.69 (m, 1H), 7.63–7.60 (m, 1H), 7.57–7.54 (m, 2H), 7.46 (ddd, *J* = 6.8, 2.9, 1.3 Hz, 1H), 7.13 (td, *J* = 7.6, 1.1 Hz, 1H), 6.91–6.88 (m, 1H) ppm.

<sup>13</sup>C NMR (CDCl<sub>3</sub>, 125 MHz): 167.5, 140.2, 140.0, 133.6, 132.9, 130.2, 129.6, 128.7, 127.9, 127.8, 127.7, 127.2, 127.2, 124.0, 123.2, 122.7, 122.3, 109.7 ppm.

HRMS (ESI): *m/z* calcd for C<sub>19</sub>H<sub>13</sub>NO SK [M + K]<sup>+</sup>: 342.0349; found: 342.0342.

**(Z)-1-Benzyl-3-(((4-chlorophenyl)thio)methylene)indolin-2-one (3j)**

Yield: 37 mg (98%) as Yellow solid; MP: 98–100 °C.

<sup>1</sup>H NMR (CDCl<sub>3</sub>, 500 MHz): δ 7.98 (s, 1H), 7.76 (d, 1H, *J* = 7.2 Hz), 7.72–7.67 (m, 1H), 7.56–7.51 (m, 1H), 7.38 (m, 3H), 7.34 (d, 3H, *J* = 4.4 Hz), 7.28 (dd, 1H, *J* = 7.6, 5.0 Hz), 7.12 (ddd, 1H, *J* = 81.1, 58.0, 7.6, 0.8 Hz), 7.07 (m, 1H), 6.77 (t, 1H, *J* = 7.1 Hz), 5.02 (d, 2H, *J* = 16.9 Hz) ppm.

<sup>13</sup>C NMR (CDCl<sub>3</sub>, 125 MHz): δ 166.7, 166.1, 142.0, 139.1, 137.7, 136.1, 135.4, 132.3, 130.3, 129.9, 128.7, 128.0, 127.6, 127.5, 127.2, 124.0, 123.9, 122.3, 121.9, 121.8, 118.8, 109.1, 108.9, 43.7 ppm.

HRMS (ESI): *m/z* calcd for C<sub>22</sub>H<sub>17</sub>ClNOS [M + H]<sup>+</sup>: 378.0719; found: 378.0688.

**(Z)-1-Benzyl-3-(((2-chlorophenyl)thio)methylene)indolin-2-one (3k)**

Yield: 36 mg (95%) as Yellow solid; MP: 100–102 °C.

<sup>1</sup>H NMR (CDCl<sub>3</sub>, 500 MHz): δ 7.95 (s, 1H), 7.74–7.72 (m, 1H), 7.67–7.65 (m, 1H), 7.52–7.49 (m, 1H), 7.36 (ddd, 3H, *J* = 7.2, 4.6, 1.9 Hz), 7.31 (d, 4H, *J* = 4.4 Hz), 7.19 (td, 1H, *J* = 7.8, 1.1 Hz), 7.11–7.07 (m, 1H), 6.74 (d, 1H, *J* = 7.8), 4.95 (s, 2H) ppm.

<sup>13</sup>C NMR (CDCl<sub>3</sub>, 125 MHz): δ 166.2, 142.1, 137.8, 136.1, 133.6, 132.6, 132.4, 130.5, 130.3, 130.0, 129.0, 128.8, 128.0, 127.7, 127.6, 127.3, 124.0, 122.3, 122.0, 121.9, 118.8, 109.2, 109.0, 43.8 ppm.

HRMS (ESI): *m/z* calcd for C<sub>22</sub>H<sub>17</sub>ClNOS [M + H]<sup>+</sup>: 378.0719; found: 378.0686.

**(Z)-1-Benzyl-3-((naphthalen-2-ylthio)methylene)indolin-2-one (3l)**

Yield: 36 mg (92%) as Yellow solid; MP: 150–152 °C.

<sup>1</sup>H NMR (CDCl<sub>3</sub>, 500 MHz): δ 8.16 (s, 1H), 8.09 (d, 1H, *J* = 1.7 Hz), 7.92–7.85 (m, 4H), 7.72 (dd, 1H, *J* = 7.4, 0.5 Hz), 7.63 (dd, 1H, *J* = 8.6, 1.9 Hz), 7.55 (dd, 2H, *J* = 6.5, 3.0 Hz), 7.32–7.31 (m, 4H), 7.18 (dd, 1H, *J* = 7.8, 1.2 Hz), 7.10 (td, 1H, *J* = 7.6, 1.0 Hz), 6.74 (s, 1H), 4.99 (s, 2H) ppm.

<sup>13</sup>C NMR (CDCl<sub>3</sub>, 125 MHz): δ 166.3, 142.0, 139.8, 136.2, 133.6, 133.0, 130.5, 130.1, 129.6, 128.8, 128.5, 128.0, 127.9, 127.7, 127.7, 127.5, 127.3, 127.2, 127.1, 123.8, 123.0, 122.3, 122.2, 108.9, 43.7, 29.7 ppm.

HRMS (ESI): *m/z* calcd for C<sub>26</sub>H<sub>20</sub>NOS [M + H]<sup>+</sup>: 394.1260; found: 394.1257.

**(Z)-3-(((4-Chlorophenyl)thio)methylene)-1-methylindolin-2-one (3m)**

Yield: 29 mg (96%) as Yellow solid; MP: 140–142 °C.

<sup>1</sup>H NMR (CDCl<sub>3</sub>, 500 MHz): δ 7.87 (s, 1H), 7.63 (ddd, 1H, *J* = 7.6, 1.2, 0.6 Hz), 7.50 (d, 2H, *J* = 8.8 Hz), 7.40 (d, 2H, *J* = 8.9 Hz), 7.30 (td, 1H, *J* = 7.7, 1.3 Hz), 7.11 (td, 1H, *J* = 7.6, 1.1 Hz), 6.86–6.83 (m, 1H), 3.26 (s, 3H) ppm.

<sup>13</sup>C NMR (CDCl<sub>3</sub>, 125 MHz): δ 166.1, 143.0, 138.5, 132.37, 132.36, 132.3, 131.8, 129.9, 128.8, 123.7, 123.5, 122.2, 121.8, 108.0, 77.3, 77.1, 76.8, 26.2 ppm.

HRMS (ESI): *m/z* calcd for C<sub>16</sub>H<sub>13</sub>NOSCl [M + H]<sup>+</sup>: 302.0406; found: 302.0408.

### **(Z)-3-(((2-Chlorophenyl)thio)methylene)-1-methylindolin-2-one (3n)**

Yield: 29 mg (96%) as Yellow solid; MP: 148–150 °C.

<sup>1</sup>H NMR (CDCl<sub>3</sub>, 500 MHz): δ 7.85 (s, 1H), 7.61 (ddd, 1H, *J* = 7.6, 1.2, 0.6 Hz), 7.50–7.47 (m, 2H), 7.40–7.37 (m, 2H), 7.28 (td, 1H, *J* = 7.7, 1.3 Hz), 7.09 (td, 1H, *J* = 7.6, 1.1 Hz), 6.84–6.81 (m, 1H), 3.24 (s, 3H) ppm.

<sup>13</sup>C NMR (CDCl<sub>3</sub>, 125 MHz): δ 166.1, 141.8, 140.2, 136.3, 136.23, 129.1, 129.0, 128.7, 128.1, 128.1, 127.5, 127.3, 123.7, 122.1, 108.7, 43.6, 40.1 ppm.

HRMS (ESI): *m/z* calcd for C<sub>16</sub>H<sub>13</sub>NO ClS [M + H]<sup>+</sup>: 302.0406; found: 302.0408.

### **(Z)-1-Benzyl-3-((cyclohexylthio)methylene)indolin-2-one (3o)**

Yield: 32 mg (92%) as Yellow solid; MP: 126–128 °C.

<sup>1</sup>H NMR (CDCl<sub>3</sub>, 500 MHz): δ 8.01 (s, 1H), 7.60–7.56 (m, 1H), 7.39–7.37 (m, 4H), 7.24–7.21 (m, 1H), 7.12 (ddd, 1H, *J* = 7.9, 5.3, 1.40 Hz), 7.05–6.95 (m, 1H), 6.74–6.68 (m, 1H), 4.96 (s, 2H), 3.25–3.02 (m, 1H), 2.21–2.10 (m, 1H), 1.86 (ddd, 2H, *J* = 13.6, 7.9, 3.8 Hz), 1.71–1.55 (m, 3H), 1.48–1.24 (m, 3H) ppm.

<sup>13</sup>C NMR (CDCl<sub>3</sub>, 125 MHz): δ 166.3, 141.6, 140.4, 140.2, 136.4, 128.8, 128.8, 128.8, 128.8, 128.7, 128.7, 127.8, 127.6, 127.5, 127.3, 123.5, 122.7, 122.0, 121.7, 121.6, 118.1, 108.9, 108.6, 48.7, 48.5, 43.6, 33.8, 33.7, 25.8, 25.3 ppm.

HRMS (ESI): *m/z* calcd for C<sub>22</sub>H<sub>24</sub>NSO [M + H]<sup>+</sup>: 350.1579; found: 350.1611.

### **(Z)-1-Benzyl-3-((benzylthio)methylene)indolin-2-one (3p)**

Yield: 33 mg (92%) as Yellow solid; MP: 180–182 °C.

<sup>1</sup>H NMR (CDCl<sub>3</sub>, 500 MHz): δ 7.92 (s, 1H), 7.55 (dd, 1H, *J* = 7.5, 0.6 Hz), 7.42–7.36 (m, 5H), 7.33–7.30 (m, 2H), 7.29–7.27 (m, 3H), 7.12 (m, 1H), 7.01 (td, 1H, *J* = 7.6, 1.0 Hz), 6.69 (d, 1H, *J* = 7.7 Hz), 4.94 (s, 2H), 4.26 (s, 2H) ppm.

$^{13}\text{C}$  NMR ( $\text{CDCl}_3$ , 125 MHz):  $\delta$  166.1, 141.8, 140.2, 136.29, 136.23, 129.2, 129.1, 129.05, 129.02, 128.8, 128.78, 128.74, 128.1, 128.1, 127.5, 127.3, 123.7, 122.5, 122.4, 122.1, 108.7, 44.3, 40.1 ppm.

HRMS (ESI):  $m/z$  calcd for  $\text{C}_{23}\text{H}_{20}\text{NOS}$   $[\text{M} + \text{H}]^+$ : 358.1266; found: 358.1270.

**(*E*)-2-((Phenylamino)methylene)acenaphthylen-1(2*H*)-one (5a)**

Yield: 24 mg (89%) as Yellow solid; MP: 120–122 °C

$^1\text{H}$  NMR ( $\text{CDCl}_3$ , 500 MHz)  $\delta$ : 11.14 (d,  $J = 13.4$  Hz, 1H), 8.03–7.99 (m, 3H), 7.72–7.66 (m, 2H), 7.54 (dd,  $J = 8.3, 7.0$  Hz, 1H), 7.44 (d,  $J = 5.6$  Hz, 1H), 7.42–7.38 (m, 2H), 7.21 (dd,  $J = 8.8, 1.0$  Hz, 2H), 7.11 (tt,  $J = 7.6, 1.1$  Hz, 1H) ppm.

$^{13}\text{C}$  NMR, ( $\text{CDCl}_3$ , 125 MHz):  $\delta$  193.8, 140.1, 136.1, 135.3, 134.6, 134.5, 131.1, 130.2, 130.0, 129.9, 129.9, 129.9, 128.4, 127.8, 123.7, 122.5, 121.5, 116.1, 113.4, 109.2 ppm.

HRMS (ESI):  $m/z$  calcd for  $\text{C}_{19}\text{H}_{14}\text{NO}$   $[\text{M} + \text{H}]^+$ : 272.1075; found: 272.1073.

**(*E*)-2-((*p*-Tolylamino)methylene)acenaphthylen-1(2*H*)-one (5b)**

Yield: 28 mg (98%) as Yellow solid; MP: 134–136 °C.

$^1\text{H}$  NMR ( $\text{CDCl}_3$ , 500 MHz):  $\delta$ : 11.15 (d, 1H,  $J = 12.2$  Hz), 8.04 (d, 1H,  $J = 3.2$  Hz), 8.03 (d, 1H,  $J = 2.0$  Hz), 8.00 (d, 1H,  $J = 12.5$  Hz), 7.73–7.67 (m, 2H), 7.56 (dd, 1H,  $J = 8.3, 7.0$  Hz), 7.45 (d, 1H,  $J = 6.8$  Hz), 7.22 (d, 2H,  $J = 8.1$  Hz), 7.13 (d, 2H,  $J = 8.4$  Hz), 2.38 (s, 3H) ppm.

$^{13}\text{C}$  NMR ( $\text{CDCl}_3$ , 125 MHz)  $\delta$ : 193.6, 137.6, 136.4, 135.4, 134.5, 134.3, 133.4, 130.9, 130.3, 130.1, 128.3, 127.7, 122.3, 121.3, 116.1, 114.9, 113.2, 108.7 ppm.

HRMS (ESI):  $m/z$  calcd for  $\text{C}_{20}\text{H}_{16}\text{NO}$   $[\text{M} + \text{H}]^+$ : 286.1232; found: 286.1208.

**(*E*)-2-(((4-Methoxyphenyl)amino)methylene)acenaphthylen-1(2*H*)-one (5c)**

Yield: 29 mg (96%) as Yellow solid; MP: 112–114 °C.

$^1\text{H}$  NMR ( $\text{CDCl}_3$ , 500 MHz):  $\delta$  11.12 (s, 1H), 8.01 (d, 1H,  $J = 1.6$  Hz), 8.00 (s, 1H), 7.91 (d, 1H,  $J = 12.5$  Hz), 7.68 (d, 1H,  $J = 7.7$  Hz), 7.64 (d, 1H,  $J = 8.3$  Hz), 7.54–7.50 (m, 1H), 7.40 (d, 1H,  $J = 6.9$  Hz), 7.16–7.13 (m, 2H), 6.96–6.92 (m, 2H), 3.83 (s, 3H) ppm.

$^{13}\text{C}$  NMR ( $\text{CDCl}_3$ , 125 MHz):  $\delta$  193.5, 156.5, 137.2, 135.6, 134.6, 134.2, 133.7, 130.9, 130.1, 128.3, 127.8, 122.3, 121.4, 121.4, 121.3, 117.8, 117.8, 117.8, 117.7, 117.7, 115.3, 115.2, 115.2, 115.2, 115.2, 115.2, 113.12, 108.5, 55.7 ppm.

HRMS (ESI):  $m/z$  calcd for  $\text{C}_{20}\text{H}_{16}\text{NO}_2$   $[\text{M} + \text{H}]^+$ : 302.1181; found: 302.1186.



**(E)-2-(((4-Chlorophenyl)amino)methylene)acenaphthylen-1(2H)-one (5d)**

Yield: 29 mg (95%) as Yellow solid; MP: 155–157 °C.

<sup>1</sup>H NMR (CDCl<sub>3</sub>, 500 MHz): δ 11.13 (d, 1H, *J* = 12.1 Hz), 8.05–8.01 (m, 2H), 7.93 (d, 1H, *J* = 12.3 Hz), 7.73–7.68 (m, 2H), 7.55 (dd, 1H, *J* = 8.3, 6.9 Hz), 7.45 (dd, 1H, *J* = 6.9, 0.5 Hz), 7.37–7.34 (m, 2H), 7.15–7.12 (m, 2H) ppm.

<sup>13</sup>C NMR (CDCl<sub>3</sub>, 125 MHz): δ 194.0, 138.8, 135.5, 134.9, 134.8, 134.3, 131.2, 130.2, 129.9, 128.6, 128.4, 127.9, 122.8, 121.6, 117.2, 113.6, 109.8 ppm.

HRMS (ESI): *m/z* calcd for C<sub>19</sub>H<sub>13</sub>NOCl [M + H]<sup>+</sup>: 306.0686; found: 306.0651.

**(E)-2-(((4-Bromophenyl)amino)methylene)acenaphthylen-1(2H)-one (5e)**

Yield: 33 mg (95%) as Yellow solid; MP: 135–137 °C.

<sup>1</sup>H NMR (CDCl<sub>3</sub>, 500 MHz): δ 11.11 (d, 1H, *J* = 12.1 Hz), 8.16 (dd, 1H, *J* = 34.7, 8.3 Hz), 8.04–8.00 (m, 1H), 7.93–7.80 (m, 2H), 7.71–7.67 (m, 1H), 7.56–7.43 (m, 4H), 7.07 (d, 2H, *J* = 8.9 Hz) ppm.

<sup>13</sup>C NMR (CDCl<sub>3</sub>, 125 MHz): δ 194.0, 139.3, 135.3, 135.0, 134.9, 134.3, 132.9, 132.8, 132.4, 131.2, 130.2, 130.1, 129.0, 128.41, 128.40, 128.3, 127.9, 127.8, 123.0, 122.8, 121.6, 117.5, 116.0, 113.7, 113.6, 109.9 ppm.

HRMS (ESI): *m/z* calcd for C<sub>19</sub>H<sub>13</sub>BrNO [M + H]<sup>+</sup>: 350.0181; found: 350.0142.

**(E)-2-(((4-Iodophenyl)amino)methylene)acenaphthylen-1(2H)-one (5f)**

Yield: 38 mg (96%) as Yellow solid; MP: 198–200 °C.

<sup>1</sup>H NMR (CDCl<sub>3</sub>, 500 MHz): δ 11.06 (d, 1H, *J* = 11.6 Hz), 7.99 (dd, 2H, *J* = 11.7, 7.5 Hz), 7.86 (d, 1H, *J* = 12.2 Hz), 7.70–7.62 (m, 4H), 7.55–7.51 (m, 1H), 7.42 (s, 1H), 6.95–6.90 (m, 2H) ppm.

<sup>13</sup>C NMR (CDCl<sub>3</sub>, 125 MHz): δ 194.0, 139.8, 138.6, 134.9, 134.87, 134.80, 134.2, 131.1, 130.1, 128.3, 127.8, 122.7, 121.5, 117.7, 113.6, 109.9, 86.0 ppm.

HRMS (ESI): *m/z* calcd for C<sub>19</sub>H<sub>12</sub>INO [M]<sup>+</sup>: 396.9964; found: 396.9929.

**(E)-2-(((3,5-Bis(trifluoromethyl)phenyl)amino)methylene)acenaphthylen-1(2H)-one (5g)**

Yield: 34 mg (84%) as Yellow solid; MP: 232–234 °C.

<sup>1</sup>H NMR (CDCl<sub>3</sub>, 500 MHz): δ 11.28 (d, 1H, *J* = 11.7 Hz), 8.04 (dd, 2H, *J* = 9.0, 7.7 Hz), 7.89 (d, 1H, *J* = 11.8 Hz), 7.74–7.68 (m, 2H), 7.61–7.57 (m, 1H), 7.55 (s, 1H), 7.53 (d, 3H, *J* = 4.0 Hz) ppm.

<sup>13</sup>C NMR (CDCl<sub>3</sub>, 125 MHz): δ 194.4, 141.6, 135.6, 133.8, 133.7, 133.4, 133.2, 131.5, 130.2, 128.3, 127.9,

124.1, 123.4, 121.9, 121.8, 116.0, 115.2, 114.3, 111.7 ppm.

HRMS (ESI):  $m/z$  calcd for  $C_{21}H_{12}NOF_6$   $[M + H]^+$ : 408.0823; found: 408.0782.

**(E)-2-(((3-Chloro-4-methoxyphenyl)amino)methylene)acenaphthylen-1(2H)-one (5h)**

Yield: 31 mg (93%) as Yellow solid; MP: 182–184 °C.

$^1H$  NMR ( $CDCl_3$ , 500 MHz):  $\delta$  11.09 (d, 1H,  $J = 12.2$  Hz), 8.03 (t, 2H,  $J = 7.0$  Hz), 7.87 (d, 1H,  $J = 12.3$  Hz), 7.74–7.67 (m, 2H), 7.58–7.54 (m, 1H), 7.45 (d, 1H,  $J = 6.9$  Hz), 7.29 (s, 1H), 7.06 (dd, 1H,  $J = 8.8, 2.7$  Hz), 6.96 (d, 1H,  $J = 8.8$  Hz), 3.93 (s, 3H) ppm.

$^{13}C$  NMR ( $CDCl_3$ , 125 MHz):  $\delta$  193.7, 151.6, 136.2, 135.0, 134.5, 134.3, 134.2, 131.0, 130.1, 128.3, 127.7, 123.8, 122.5, 121.4, 118.1, 115.8, 113.4, 113.3, 109.2, 56.5 ppm.

HRMS (ESI):  $m/z$  calcd for  $C_{20}H_{15}NO_2Cl$   $[M + H]^+$ : 336.0791; found: 336.0781.

**(Z)-3-((p-Tolylamino)methylene)indolin-2-one (5i)**

Yield: 24 mg (96%) as Yellow solid; MP: 117–119 °C.

$^1H$  NMR ( $CDCl_3 + DMSO$ , 500 MHz):  $\delta$  10.30 (d, 1H,  $J = 12.5$  Hz), 9.63 (s, 1H), 7.71 (d, 1H,  $J = 12.5$  Hz), 6.99–6.97 (m, 1H), 6.74 (d, 2H,  $J = 8.1$  Hz), 6.69–6.66 (m, 2H), 6.59 (dt, 1H,  $J = 7.6, 3.8$  Hz), 6.52 (dd, 1H,  $J = 7.5, 1.1$  Hz), 6.49 (dd, 1H,  $J = 8.2, 4.4$  Hz), 1.90 (s, 3H) ppm.

$^{13}C$  NMR ( $CDCl_3 + DMSO$ , 125 MHz):  $\delta$  170.7, 137.6, 137.3, 137.0, 132.9, 130.3, 124.3, 124.0, 120.7, 116.3, 115.9, 109.7, 99.6, 20.8 ppm.

HRMS (ESI):  $m/z$  calcd for  $C_{16}H_{15}N_2O$   $[M + H]^+$ : 251.1184; found: 251.1201.

**(Z)-3-(((4-Chlorophenyl)amino)methylene)indolin-2-one (5j)**

Yield: 26 mg (96%) as Yellow solid; MP: 282–284 °C.

$^1H$  NMR ( $CDCl_3$ , 500 MHz):  $\delta$  10.66 (dd, 1H,  $J = 13.6, 6.05$  Hz), 7.95 (dd, 1H,  $J = 22.8, 13.2$  Hz), 7.60–7.65 (m, 1H), 7.37 (dd, 1H,  $J = 1.4, 0.7$  Hz), 7.36–7.35 (m, 1H), 7.35 (s, 1H), 7.33 (d, 1H,  $J = 2.4$  Hz), 7.12 (dd, 1H,  $J = 6.6, 1.0$  Hz), 7.10–7.09 (m, 1H), 7.09–7.07 (m, 1H), 7.05–7.01 (m, 1H) ppm.

$^{13}C$  NMR ( $CDCl_3 + DMSO$ , 125 MHz):  $\delta$  171.0, 140.5, 138.3, 138.2, 133.3, 125.3, 125.1, 121.4, 118.8, 118.2, 115.5, 110.2, 101.5, 80.2, 80.0, 79.7, 41.0, 40.8, 40.6, 40.5, 40.3 ppm.

HRMS (ESI):  $m/z$  calcd for  $C_{15}H_{12}ClN_2O$   $[M + H]^+$ : 271.0638; found: 271.0635.

**(Z)-3-(((3,5-Dimethylphenyl)amino)methylene)indolin-2-one (5k)**

Yield: 26 mg (98%) as Yellow solid; MP: 238–240 °C.

<sup>1</sup>H NMR (CDCl<sub>3</sub> + DMSO, 500 MHz): δ 10.52 (s, 1H), 9.23 (s, 1H), 7.94–7.88 (m, 1H), 7.29 (s, 1H), 7.25 (d, 1H, *J* = 9.1 Hz), 6.94 (ddd, 1H, *J* = 12.8, 7.6, 6.4 Hz), 6.86 (ddd, 1H, *J* = 7.5, 4.2, 1.1 Hz), 6.84–6.80 (m, 1H), 6.67 (d, 1H, *J* = 14.7 Hz), 6.63–6.58 (m, 1H), 2.23 (s, 3H), 2.20 (s, 3H) ppm.

<sup>13</sup>C NMR (CDCl<sub>3</sub> + DMSO, 125 MHz): δ 170.7, 170.66, 139.8, 139.7, 139.6, 139.6, 137.0, 136.9, 136.7, 136.6, 125.4, 125.3, 124.3, 124.3, 124.1, 124.1, 120.9, 120.8, 116.1, 116.0, 113.8, 113.7, 109.7, 109.7, 99.6, 21.4 ppm.

HRMS (ESI): *m/z* calcd for C<sub>17</sub>H<sub>17</sub>N<sub>2</sub>O [M + H]<sup>+</sup>: 265.1341; found: 265.1351.

### **(Z)-3-(((4-Bromophenyl)amino)methylene)indolin-2-one (5l)**

Yield: 30 mg (95%) as Yellow solid; MP: 289–291 °C.

<sup>1</sup>H NMR (CDCl<sub>3</sub> + DMSO, 500 MHz): δ 10.68 (d, *J* = 12.4 Hz, 1H), 10.42 (s, 1H), 8.47 (d, *J* = 12.3 Hz, 1H), 7.52–7.49 (m, 1H), 7.46–7.44 (m, 2H), 7.31–7.29 (m, 2H), 6.95 (td, *J* = 7.6, 1.2 Hz, 1H), 6.86 (td, *J* = 7.5, 1.1 Hz, 1H), 6.79 (dd, *J* = 4.6, 4.0 Hz, 1H) ppm.

<sup>13</sup>C NMR (CDCl<sub>3</sub> + DMSO, 125 MHz): δ 170.4, 139.9, 137.7, 137.6, 132.6, 132.5, 124.6, 124.5, 120.8, 119.1, 118.3, 118.2, 118.2, 117.6, 114.9, 109.6, 100.9 ppm.

HRMS (ESI): *m/z* calcd for C<sub>15</sub>H<sub>12</sub>BrN<sub>2</sub>O [M + H]<sup>+</sup>: 315.0133; found: 315.0115.

### **(Z)-3-(((3,5-Bis(trifluoromethyl)phenyl)amino)methylene)indolin-2-one (5m)**

Yield: 31 mg (83%) as Yellow solid; MP: 270–272 °C.

<sup>1</sup>H NMR (CDCl<sub>3</sub> + DMSO, 500 MHz): δ 10.16 (s, 1H), 8.43 (s, 1H), 8.00 (dd, 1H, *J* = 21.3, 7.5 Hz), 7.80 (s, 1H), 7.65–7.59 (m, 2H), 7.21 (t, 1H, *J* = 7.6 Hz), 7.12–7.04 (m, 3H) ppm.

<sup>13</sup>C NMR (CDCl<sub>3</sub> + DMSO, 125 MHz): δ 175.6, 157.7, 146.7, 142.7, 137.8, 137.5, 130.2, 128.3, 125.8, 122.3, 120.2, 116.0, 114.7, 108.1, 34.3 ppm.

HRMS (ESI): *m/z* calcd for C<sub>17</sub>H<sub>11</sub>N<sub>2</sub>OF<sub>6</sub> [M + H]<sup>+</sup>: 373.0770; found: 373.0772.

### **(Z)-3-(((4-Methoxyphenyl)amino)methylene)indolin-2-one (5n)**

Yield: 25 mg (94%) as Yellow solid; MP: 124–126 °C.

<sup>1</sup>H NMR (CDCl<sub>3</sub>, 500 MHz): δ 10.62 (d, 1H, 12.6 Hz), 8.19 (s, 1H, *J* = 12.6 Hz), 7.92 (d, 1H, *J* = 12.7 Hz), 7.35 (d, 1H, *J* = 7.4 Hz), 7.13–7.09 (m, 2H), 7.07 (dd, 1H, *J* = 7.6, 1.1 Hz), 7.02 (td, 1H, *J* = 7.5, 0.9 Hz), 6.96–6.91 (m, 3H), 3.78 (s, 3H) ppm.

<sup>13</sup>C NMR (CDCl<sub>3</sub> + DMSO, 125 MHz): δ 170.7, 137.6, 137.3, 137.0, 132.9, 130.3, 124.3, 124.0, 120.7,

116.3, 115.9, 109.7, 99.6, 41.8 ppm.

HRMS (ESI):  $m/z$  calcd for  $C_{16}H_{15}N_2O_2$   $[M + H]^+$ : 267.1128; found: 267.1128.

**(Z)-3-(((3,4-Dimethoxyphenyl)amino)methylene)-1-methylindolin-2-one (5o)**

Yield: 29 mg (93%) as Yellow solid; MP: 157–159 °C.

$^1H$  NMR ( $CDCl_3$ , 500 MHz):  $\delta$  10.86 (d, 1H,  $J = 12.9$ ), 7.96 (d, 1H,  $J = 12.9$  Hz), 7.38–7.35 (m, 1H), 7.13 (ddd, 2H,  $J = 8.8, 9.0, 3.2$  Hz), 7.03 (dt, 1H,  $J = 7.5, 3.8$  Hz), 6.89 (d, 1H,  $J = 7.7$  Hz), 6.55–6.50 (m, 2H), 3.94 (s, 3H), 3.81 (s, 3H), 3.36 (s, 3H) ppm.

$^{13}C$  NMR ( $CDCl_3$ , 125 MHz):  $\delta$  168.9, 156.6, 149.7, 138.5, 136.2, 123.8, 123.4, 121.1, 115.6, 113.7, 107.8, 104.4, 99.4, 98.8, 56.0, 55.7, 25.6 ppm.

HRMS (ESI):  $m/z$  calcd for  $C_{18}H_{19}N_2O_3$   $[M + H]^+$ : 311.1396; found: 311.1306.

**(Z)-3-(((3,5-Bis(trifluoromethyl)phenyl)amino)methylene)-1-methylindolin-2-one (5p)**

Yield: 33 mg (85%) as Yellow solid; MP: 217–219 °C.

$^1H$  NMR ( $CDCl_3$ , 500 MHz):  $\delta$  11.01 (s, 1H), 7.93 (d, 1H,  $J = 11.9$  Hz), 7.52 (d, 3H,  $J = 5.0$  Hz), 7.46–7.44 (m, 1H), 7.23–7.20 (m, 1H), 7.10–7.06 (m, 1H), 6.91 (d, 1H,  $J = 7.8$  Hz), 3.35 (s, 3H) ppm.

$^{13}C$  NMR ( $CDCl_3$ , 125 MHz):  $\delta$  169.0, 141.5, 139.6, 133.9, 133.5, 133.2, 125.8, 124.1, 122.4, 122.0, 121.8, 117.0, 116.0, 116.0, 115.3, 115.2, 108.3, 102.8, 25.8 ppm.

HRMS (ESI):  $m/z$  calcd for  $C_{18}H_{13}N_2OF_6$   $[M + H]^+$ : 387.0929; found: 387.0929.

**(Z)-1-Benzyl-3-(((4-methoxyphenyl)amino)methylene)indolin-2-one (5q)**

Yield: 34 mg (95%) as Yellow solid; MP: 127–129 °C.

$^1H$  NMR ( $CDCl_3$ , 500 MHz):  $\delta$  10.73 (d, 1H,  $J = 12.7$  Hz), 7.98 (d, 1H,  $J = 12.7$  Hz), 7.42–7.38 (m, 1H), 7.34 (s, 2H), 7.33 (d, 2H,  $J = 2.2$  Hz), 7.27 (dd, 1H,  $J = 3.4, 2.5$  Hz), 7.15–7.12 (m, 2H), 7.05 (td, 2H,  $J = 7.3, 1.3$  Hz), 6.97–6.94 (m, 2H), 6.84 (dd, 1H,  $J = 6.9, 1.5$  Hz), 5.09 (s, 2H), 3.84 (s, 3H) ppm.

$^{13}C$  NMR ( $CDCl_3$ , 125 MHz):  $\delta$  168.9, 156.4, 137.8, 137.6, 136.8, 133.5, 128.6, 127.3, 127.2, 123.9, 123.7, 121.2, 117.7, 115.7, 115.1, 108.7, 98.3, 55.6, 43.2 ppm.

HRMS (ESI):  $m/z$  calcd for  $C_{23}H_{21}N_2O_2$   $[M + H]^+$ : 357.1603; found: 357.1607.

**(Z)-1-Benzyl-3-(((4-chlorophenyl)amino)methylene)indolin-2-one (5r)**

Yield: 35 mg (97%) as Yellow solid; MP: 184–186 °C.

<sup>1</sup>H NMR (CDCl<sub>3</sub>, 500 MHz): δ 10.76 (d, 1H, *J* = 12.4 Hz), 7.95 (d, 1H, *J* = 12.4 Hz), 7.39 (m, 1H), 7.34 (d, 1H, *J* = 2.1 Hz), 7.32 (s, 1H), 7.30 (s, 3H), 7.25 (m, 1H), 7.09 (d, 1H, *J* = 2.4 Hz), 7.07 (dd, 2H, *J* = 3.1, 1.8 Hz), 7.03 (ddd, 2H, *J* = 14.8, 7.6, 1.3 Hz), 6.81 (m, 1H), 5.01 (s, 2H) ppm.

<sup>13</sup>C NMR (CDCl<sub>3</sub>, 125 MHz): δ 169.0, 138.6, 138.1, 136.6, 136.2, 130.0, 130.1, 129.9, 128.8, 128.8, 128.81, 128.6, 127.5, 127.3, 127.3, 127.2, 124.7, 121.6, 117.1, 116.3, 109.0, 100.0, 43.3 ppm.

HRMS (ESI): *m/z* calcd for C<sub>22</sub>H<sub>18</sub>ClN<sub>2</sub>O [M + H]<sup>+</sup>: 361.1102; found: 361.1105.

#### **(Z)-1-Benzyl-3-(((3,5-dimethylphenyl)amino)methylene)indolin-2-one (5s)**

Yield: 34 mg (96%) as Yellow solid; MP: 176–178 °C.

<sup>1</sup>H NMR (CDCl<sub>3</sub>, 500 MHz): δ 10.62 (d, 1H, *J* = 12.6 Hz), 7.97 (d, 1H, *J* = 12.6 Hz), 7.36–7.34 (m, 1H), 7.27 (s, 1H), 7.25 (d, 2H, *J* = 3.6 Hz), 7.20–7.17 (m, 1H), 7.01–6.94 (m, 3H), 6.76–6.73 (m, 3H), 6.69 (s, 1H), 5.00 (s, 2H), 2.28 (s, 6H) ppm.

<sup>13</sup>C NMR (CDCl<sub>3</sub>, 125 MHz): δ 168.9, 139.8, 139.6, 137.8, 136.9, 136.8, 128.7, 127.3, 127.2, 125.5, 124.1, 123.7, 121.3, 115.9, 113.9, 108.7, 98.9, 43.2, 21.4 ppm.

HRMS (ESI): *m/z* calcd for C<sub>24</sub>H<sub>23</sub>N<sub>2</sub>O [M + H]<sup>+</sup>: 355.1805; found: 355.1805.

#### **(Z)-1-Benzyl-3-(((3,4-dimethoxyphenyl)amino)methylene)indolin-2-one (5t)**

Yield: 37 mg (96%) as Yellow solid; MP: 138–140 °C.

<sup>1</sup>H NMR (CDCl<sub>3</sub>, 500 MHz): δ 10.89 (d, 1H, *J* = 12.9 Hz), 8.03 (d, 1H, *J* = 13.0 Hz), 7.41 (dd, 1H, *J* = 5.9, 2.5 Hz), 7.34–7.30 (m, 4H), 7.27–7.23 (m, 1H), 7.20 (d, 1H, *J* = 8.6 Hz), 7.06–7.00 (m, 2H), 6.80 (dd, 1H, *J* = 6.1, 2.4 Hz), 6.59–6.53 (m, 2H), 5.12 (s, 2H), 3.97 (s, 3H), 3.85 (s, 3H) ppm.

<sup>13</sup>C NMR (CDCl<sub>3</sub>, 125 MHz): δ 168.8, 156.7, 149.7, 137.6, 136.9, 136.4, 128.6, 127.2, 127.1, 123.9, 123.7, 123.4, 121.1, 115.6, 113.8, 108.7, 104.4, 99.4, 98.6, 55.9, 55.6, 43.1 ppm.

HRMS (ESI): *m/z* calcd for C<sub>24</sub>H<sub>23</sub>N<sub>2</sub>O<sub>3</sub> [M + H]<sup>+</sup>: 387.1709; found: 387.1730.

#### **(Z)-1-Benzyl-3-((naphthalen-2-ylamino)methylene)indolin-2-one (5u)**

Yield: 35 mg (93%) as Yellow solid; MP: 185–187 °C.

<sup>1</sup>H NMR (CDCl<sub>3</sub>, 500 MHz): δ 11.70 (s, 1H), 8.25 (d, 2H, *J* = 2.1 Hz), 7.89 (d, 1H, *J* = 8.1 Hz), 7.66–7.59 (m, 3H), 7.58–7.54 (m, 1H), 7.52–7.54 (m, 1H), 7.47–7.44 (m, 1H), 7.37 (dd, 2H, *J* = 9.2, 4.6 Hz), 7.35–7.31 (m, 2H), 7.28–7.27 (m, 1H), 7.10–7.04 (m, 2H), 6.85–6.83 (m, 1H), 5.14 (s, 2H) ppm.

<sup>13</sup>C NMR (CDCl<sub>3</sub>, 125 MHz): δ 169.4, 138.0, 137.8, 136.7, 136.0, 134.4, 128.9, 128.8, 128.6, 127.5, 127.2, 126.8, 126.7, 125.8, 124.8, 124.5, 124.1, 123.5, 121.5, 120.8, 116.3, 110.4, 109.0, 100.4, 43.3 ppm.

HRMS (ESI):  $m/z$  calcd for  $C_{26}H_{21}N_2O$   $[M + H]^+$ : 377.1654; found: 377.1627.

**(Z)-1-Benzyl-3-(((3,5-bis(trifluoromethyl)phenyl)amino)methylene)indolin-2-one (5v)**

Yield: 40 mg (87%) as Yellow solid; MP: 170–172 °C.

$^1H$  NMR ( $CDCl_3$ , 500 MHz):  $\delta$  11.03 (d, 1H,  $J = 11.9$  Hz), 7.93 (d, 1H,  $J = 11.9$  Hz), 7.48 (s, 3H), 7.41 (d, 1H,  $J = 7.3$  Hz), 7.27 (s, 2H), 7.23 (m, 1H), 7.21 (s, 2H), 7.07 (td, 1H,  $J = 7.7, 1.1$  Hz), 7.01 (dt, 1H,  $J = 7.5, 3.8$  Hz), 6.78 (d, 1H,  $J = 7.7$  Hz), 4.99 (s, 2H) ppm.

$^{13}C$  NMR ( $CDCl_3$ , 125 MHz):  $\delta$  169.0, 141.4, 138.7, 136.2, 134.2, 133.5, 133.2, 128.8, 128.7, 127.6, 127.5, 127.2, 127.0, 125.7, 122.5, 121.8, 117.0, 116.1, 115.2, 115.0, 109.2, 109.1, 102.5, 43.4 ppm.

HRMS (ESI):  $m/z$  calcd for  $C_{24}H_{17}N_2OF_6$   $[M + H]^+$ : 463.1245; found: 463.1309.

APACENS  
single\_pulse

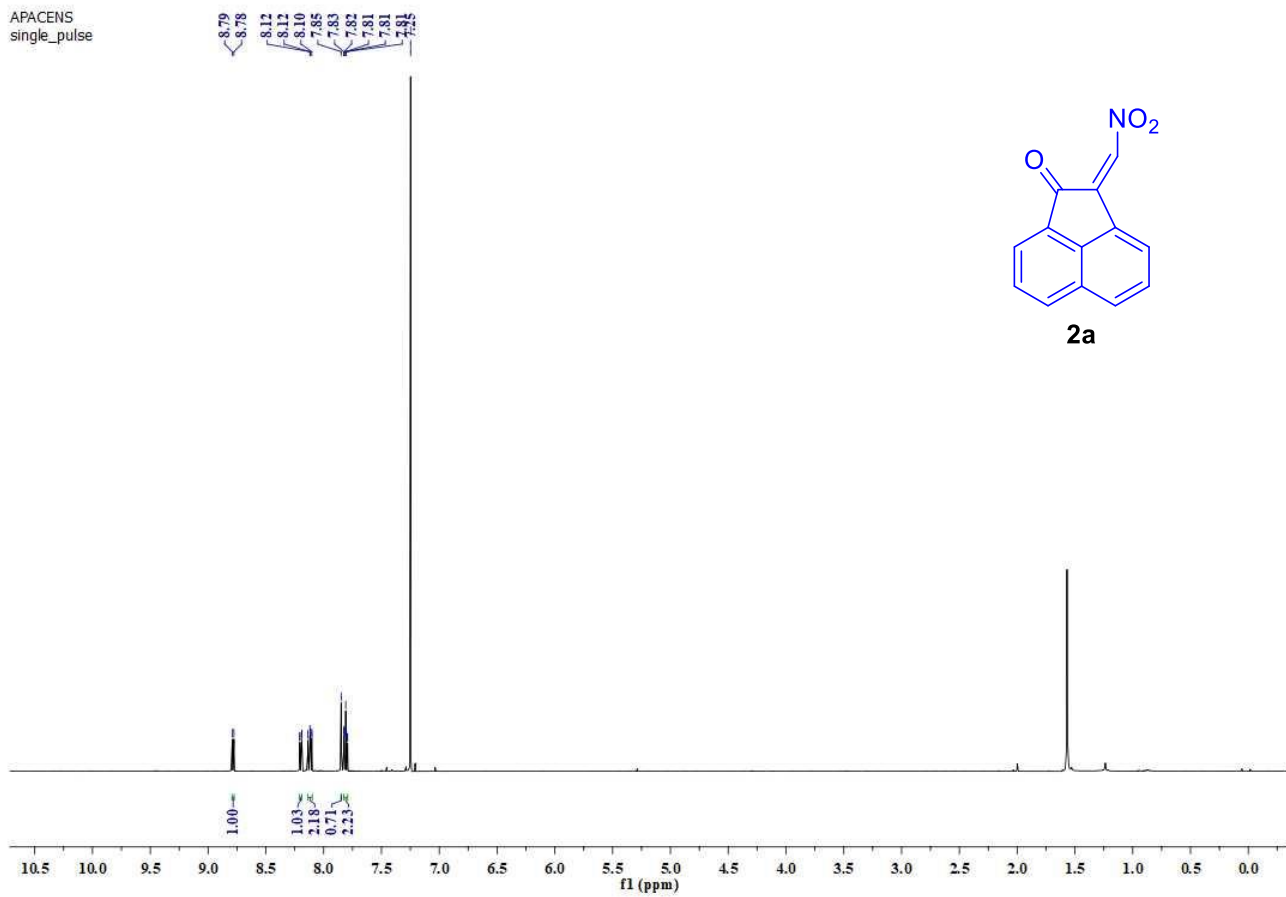

APACENS  
single\_pulse decoupled  
integrated NOE

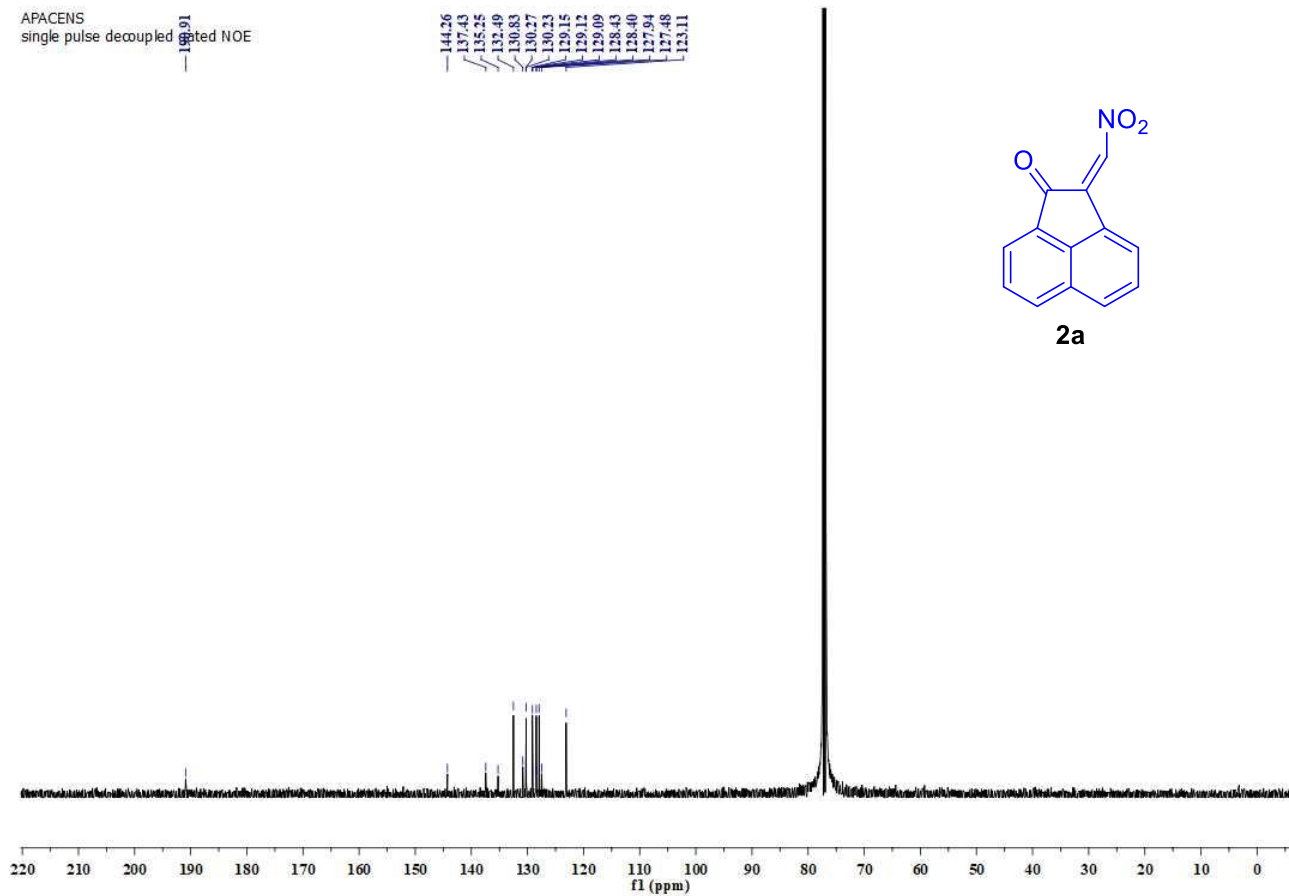

RKP-AP-120  
single\_pulse

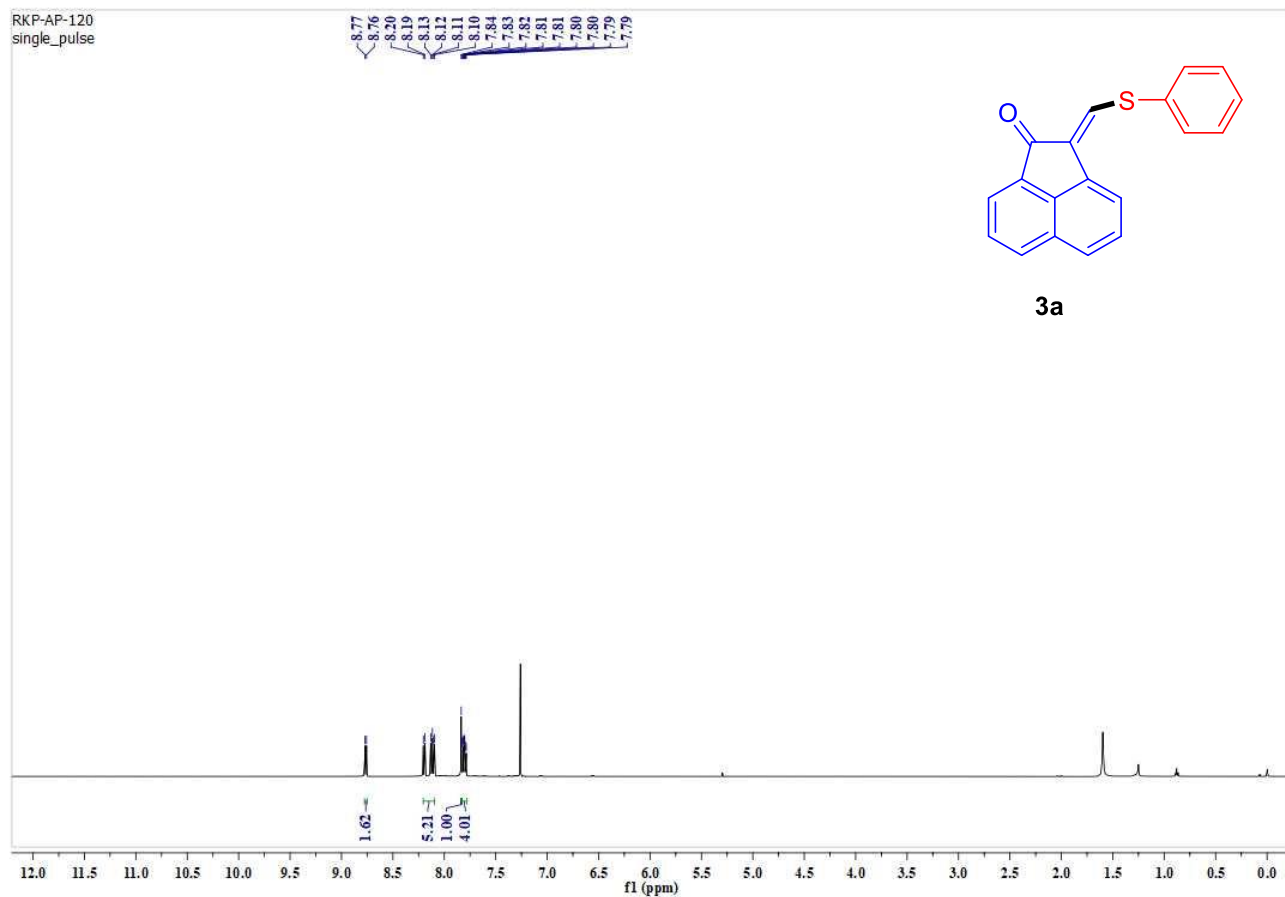

RKP-AP-120  
single pulse decoupled gated NOE

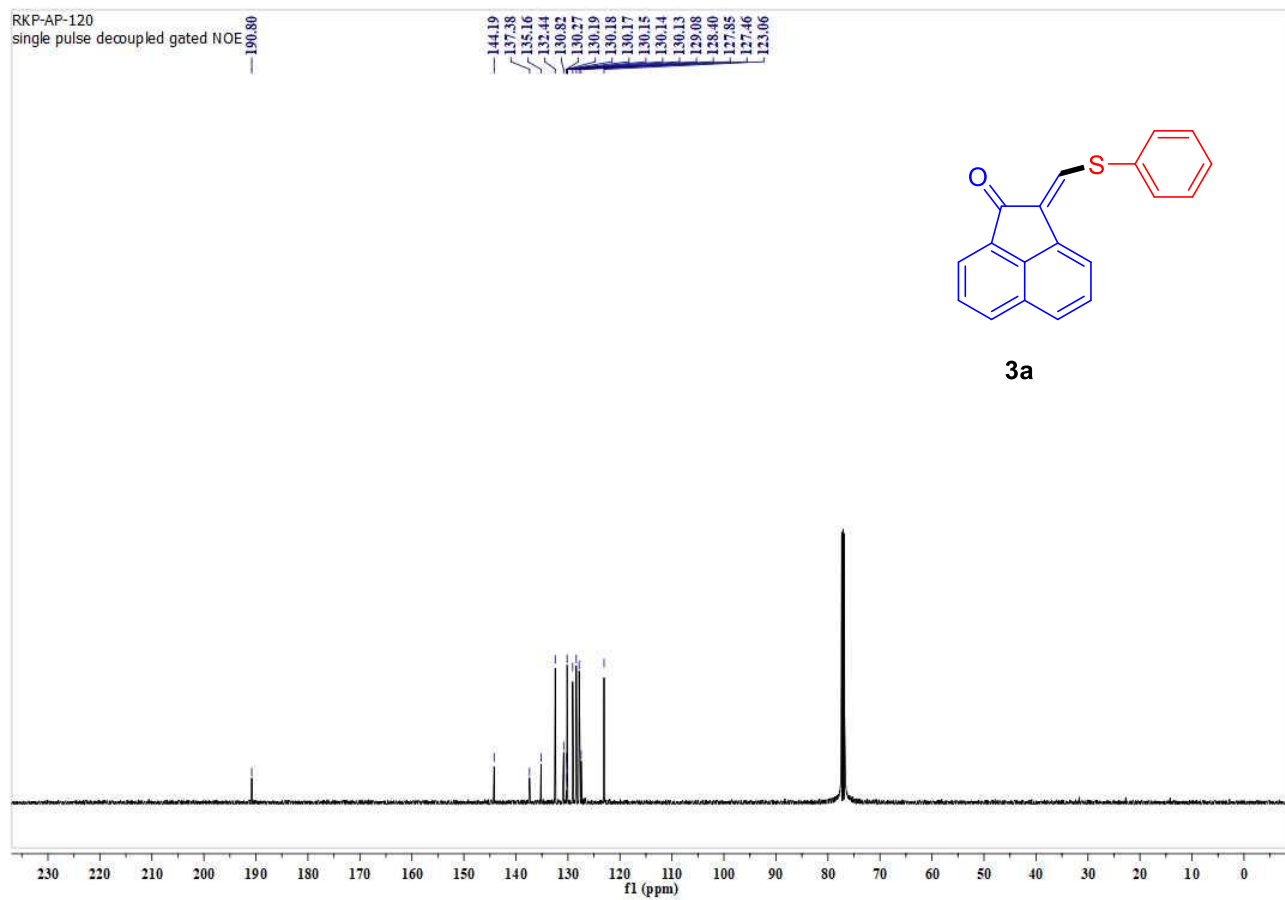



RKP-AP-122  
single\_pulse

8.08  
8.06  
8.01  
8.00  
7.97  
7.95  
7.90  
7.86  
7.84  
7.73  
7.72  
7.70  
7.68  
7.63  
7.61  
7.33  
7.33  
7.32  
7.32  
7.31  
7.31  
7.30  
7.29  
7.29

2.52

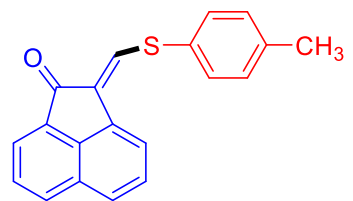

**3b**

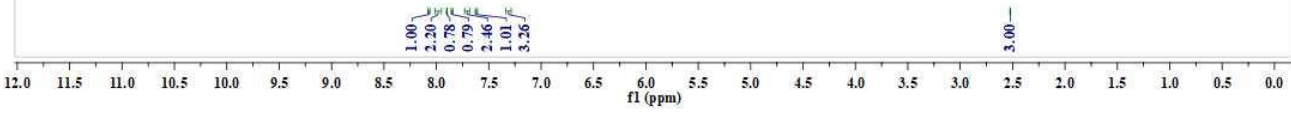

RKP-AP-122  
single pulse decoupled gated NOE

139.80  
139.15  
138.49  
133.68  
133.11  
132.85  
132.68  
132.67  
132.66  
132.64  
131.29  
131.28  
131.27  
130.94  
130.88  
130.64  
130.43  
129.31  
128.52  
128.06  
127.36  
125.02  
121.86  
121.01

21.00

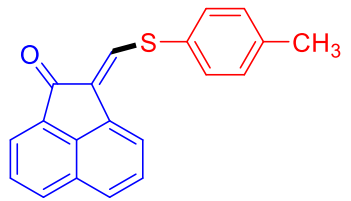

**3b**

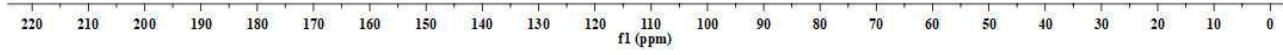

RKP-AP121  
single\_pulse

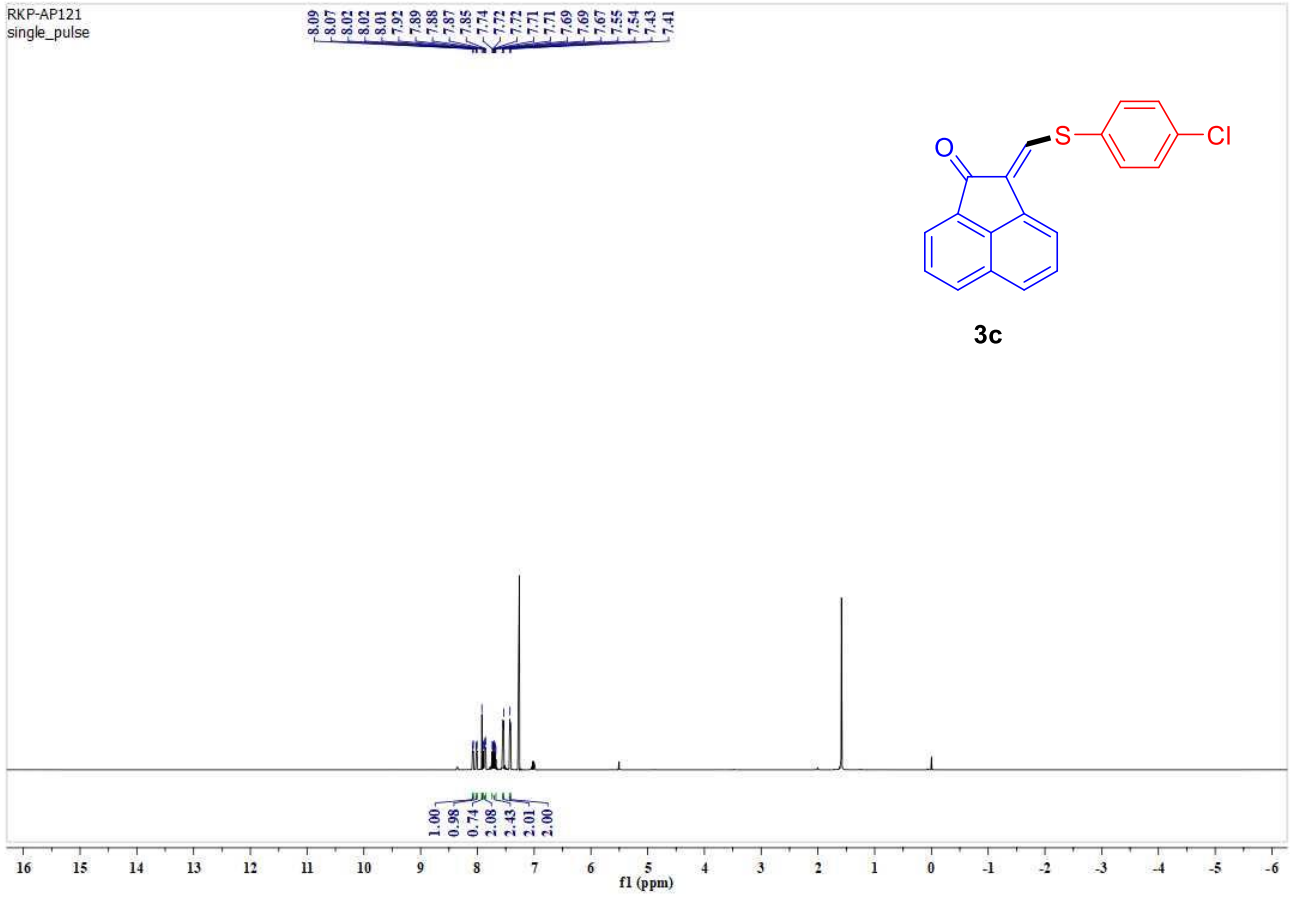

Desktop  
PD 411 AC

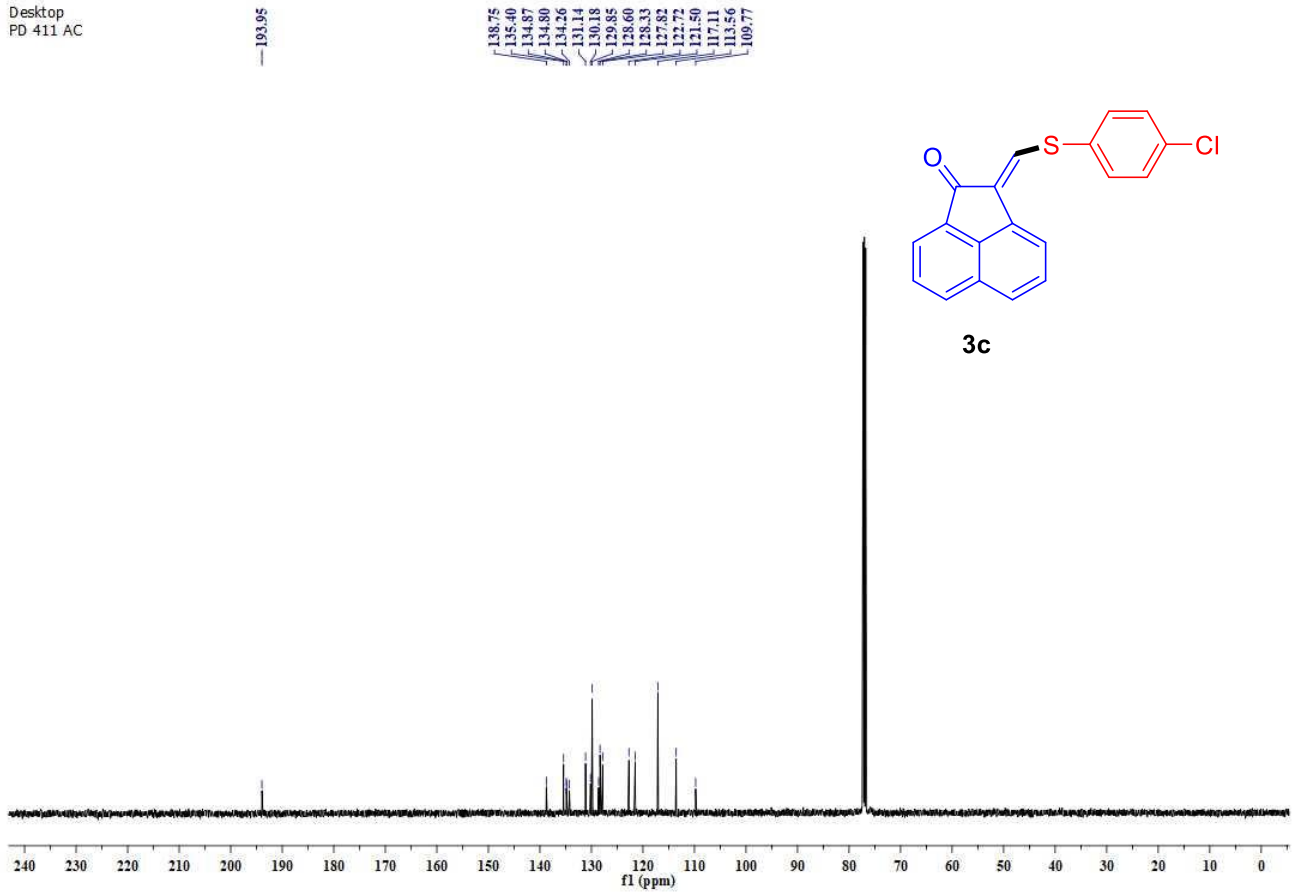

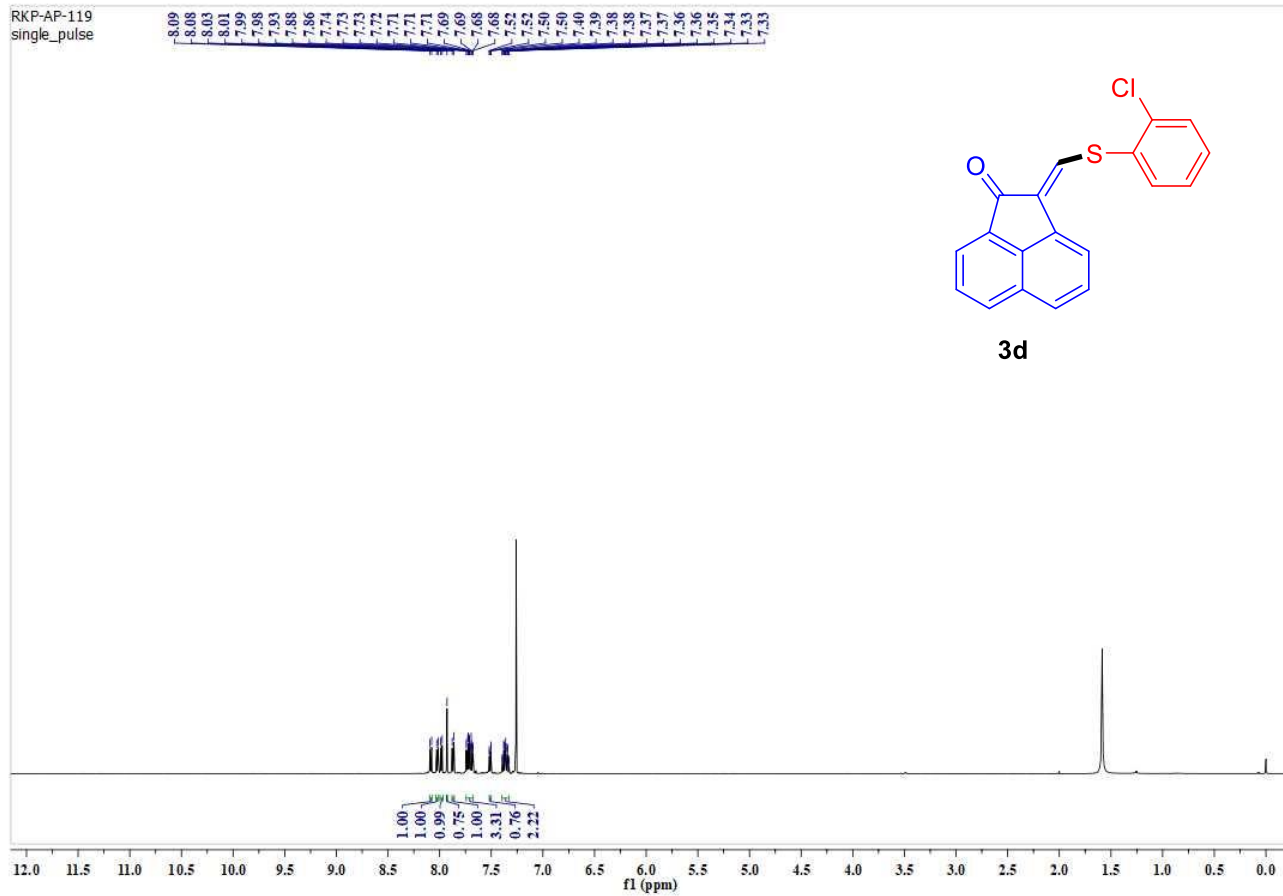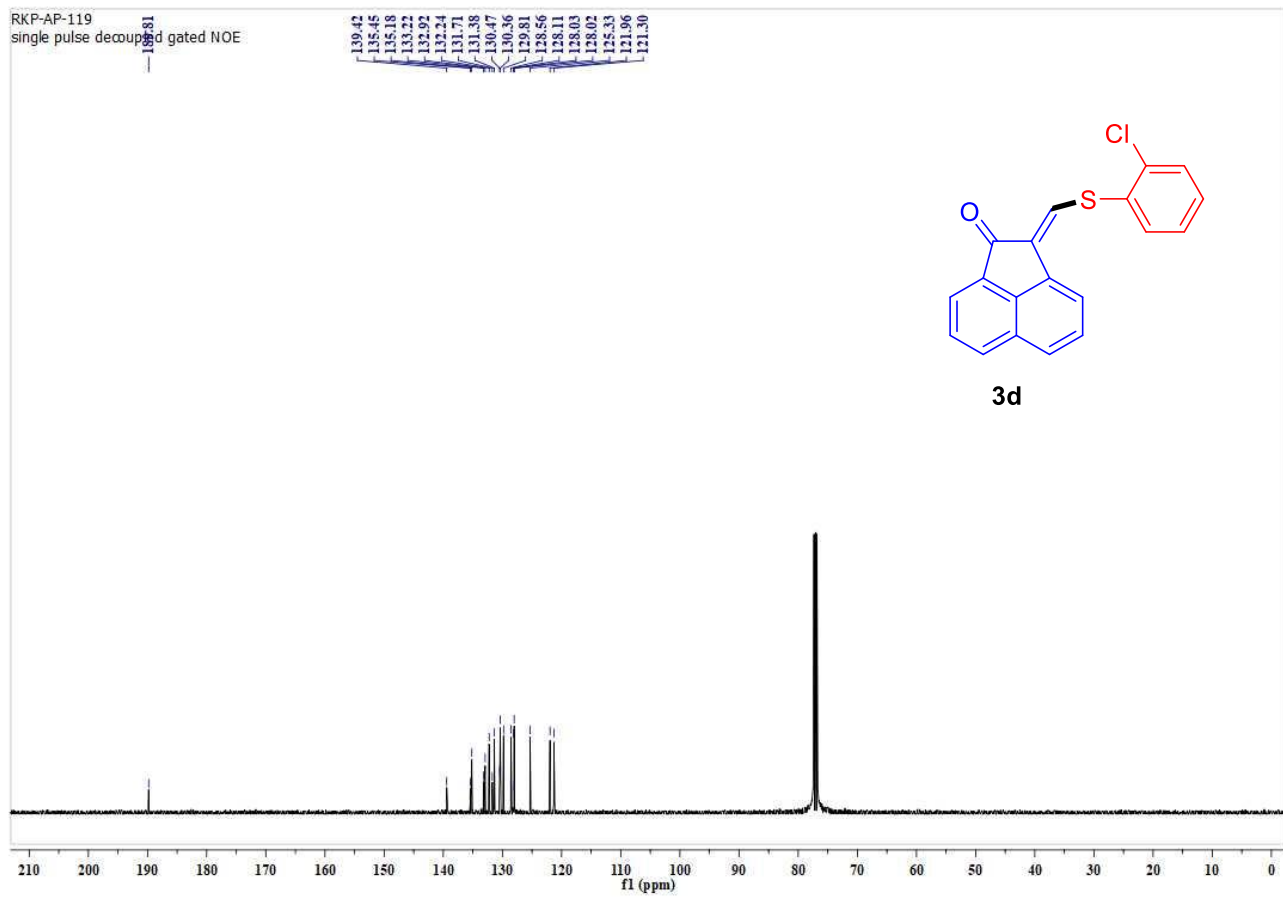

RKP-AP-123  
single\_pulse

8.14  
8.11  
8.11  
8.09  
8.09  
8.08  
8.08  
8.03  
8.03  
8.02  
8.02  
7.97  
7.96  
7.93  
7.91  
7.89  
7.88  
7.88  
7.87  
7.86  
7.74  
7.73  
7.73  
7.72  
7.71  
7.70  
7.67  
7.67  
7.65  
7.65  
7.57  
7.57  
7.56  
7.56  
7.55  
7.55  
7.55

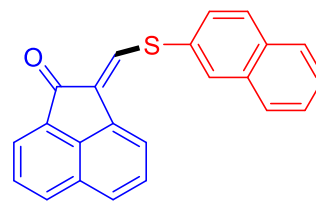

**3e**

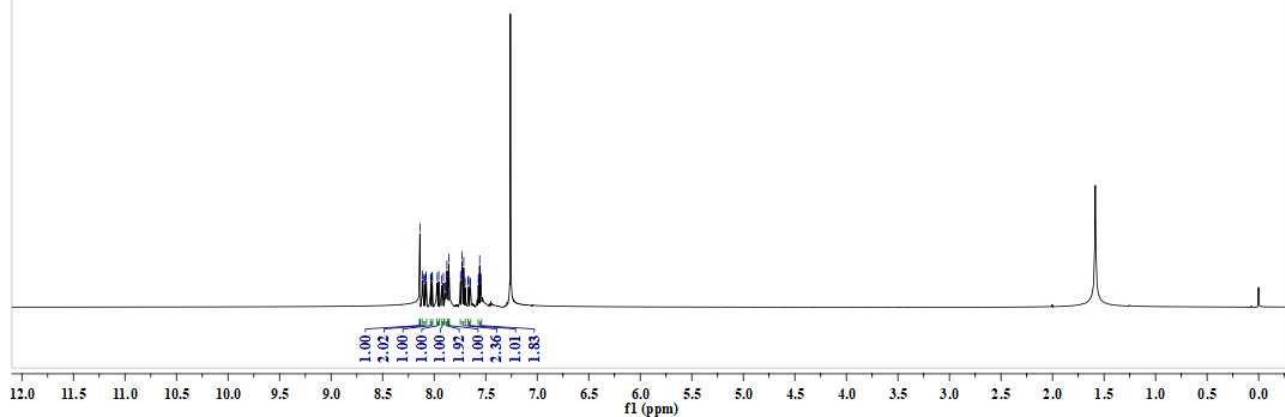

RKP-AP-123

single pulse decoupled gated OE

139.24  
137.42  
133.72  
133.57  
133.09  
132.96  
131.32  
130.81  
130.77  
130.46  
130.10  
129.57  
128.56  
128.55  
128.10  
127.96  
127.80  
127.77  
127.23  
127.08  
125.13  
121.93  
121.04

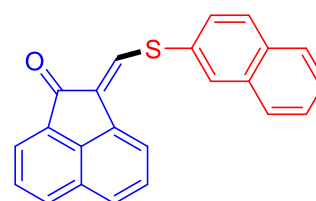

**3e**

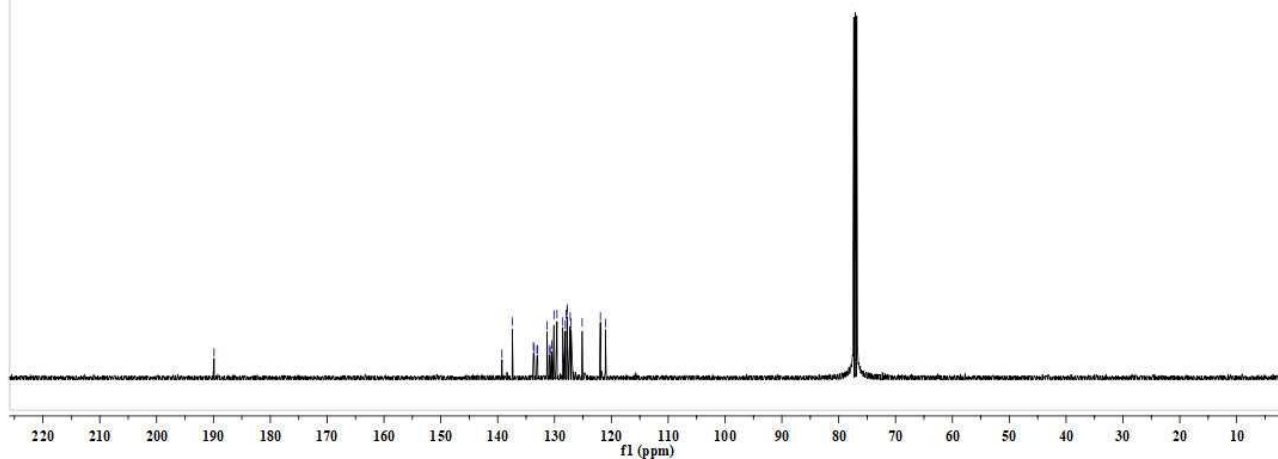

RKP-AP-195  
single\_pulse

8.06  
7.97  
7.66  
7.64  
7.59  
7.58  
7.58  
7.57  
7.45  
7.45  
7.43  
7.43  
7.43  
7.42  
7.42  
7.41  
7.41  
7.40  
7.40  
7.25  
7.25  
7.23  
7.23  
7.22  
7.22  
7.12  
7.11  
7.10  
7.10  
7.09  
7.08  
6.90  
6.88

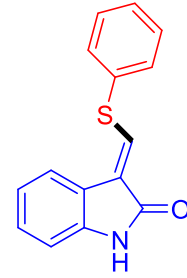

3f

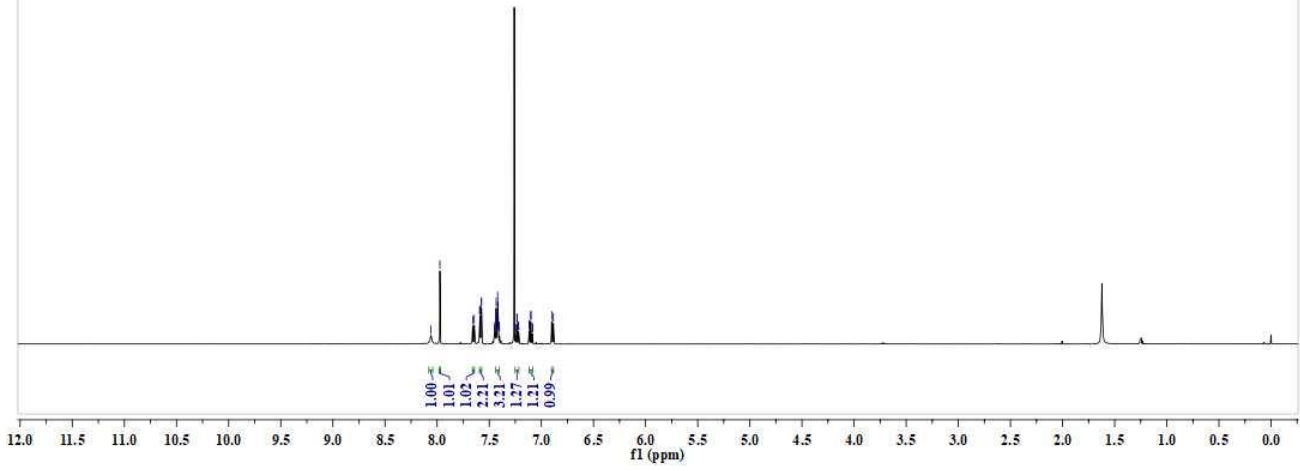

RKP-AP-195  
single\_pulse decoupled gated NOE

167.54  
140.54  
140.00  
131.17  
129.74  
128.97  
128.65  
124.02  
123.06  
122.78  
109.70

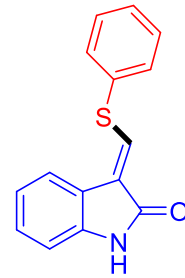

3f

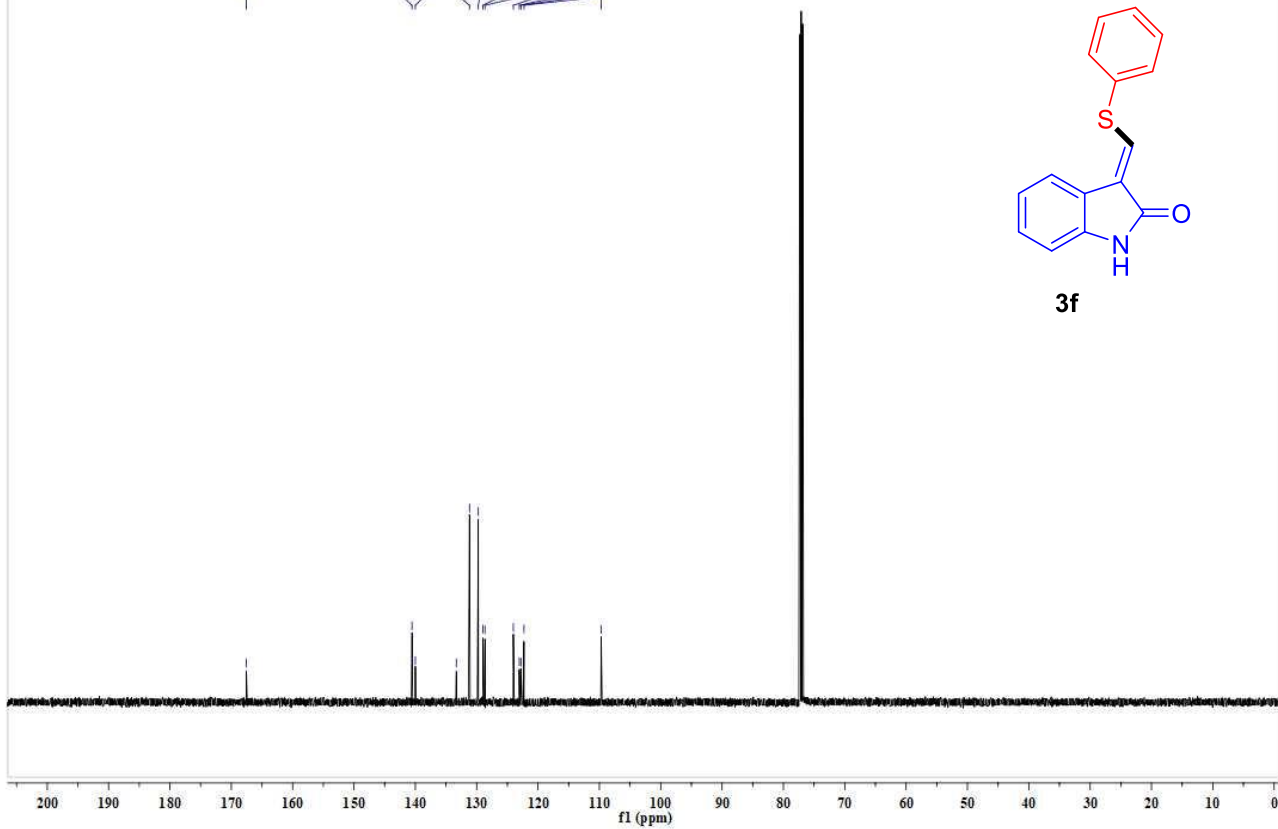

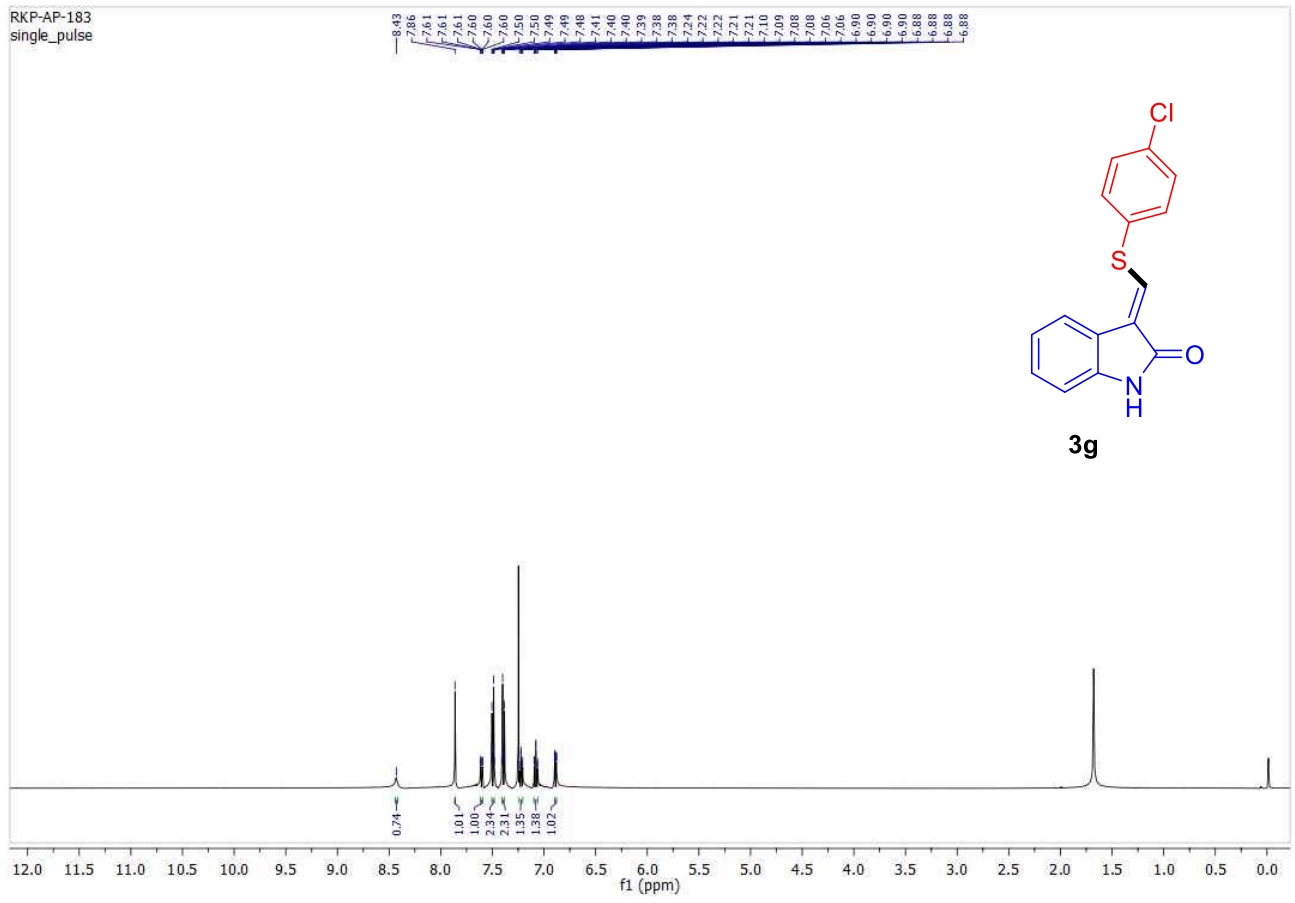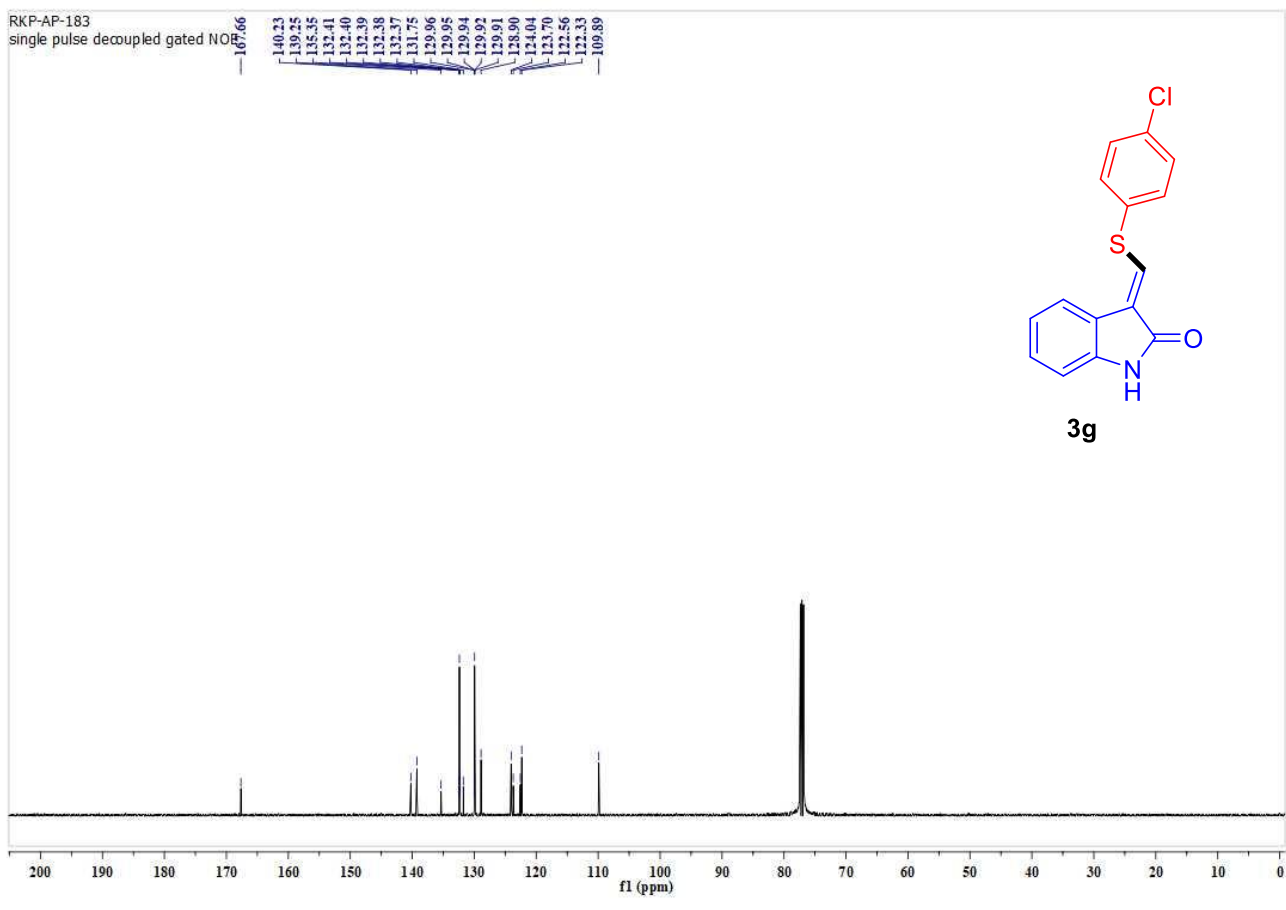

RKP-AP-181  
single\_pulse

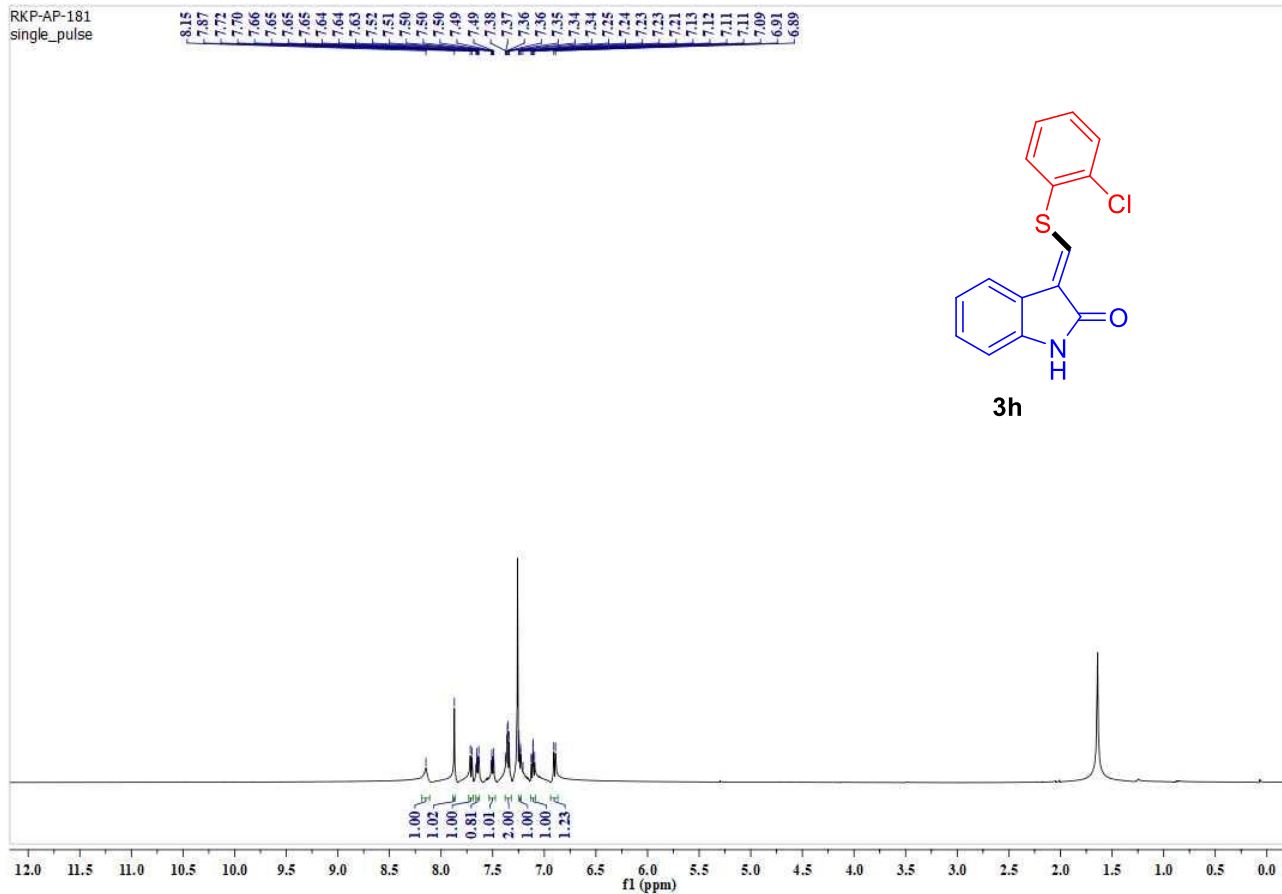

RKP-AP-181  
single\_pulse decoupled gated NOE

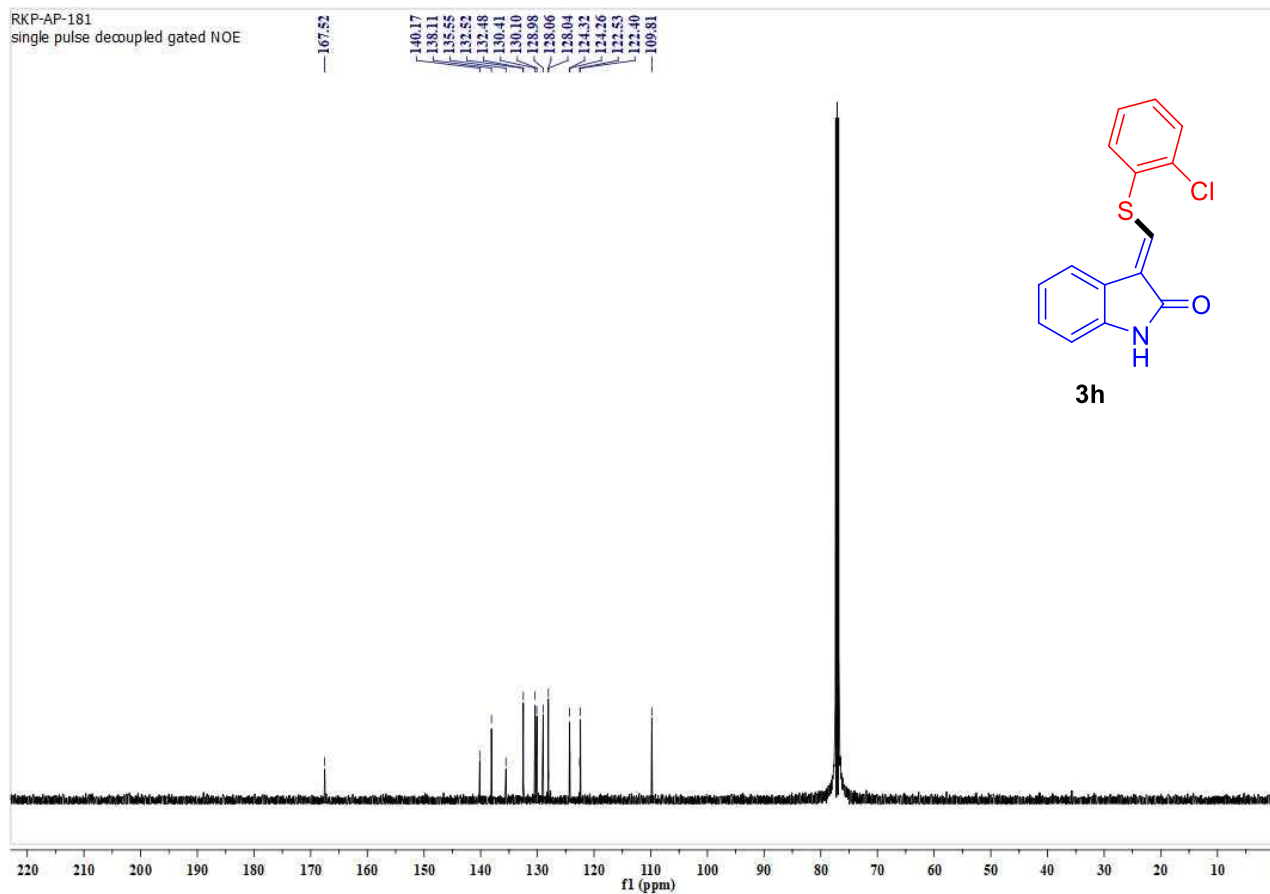

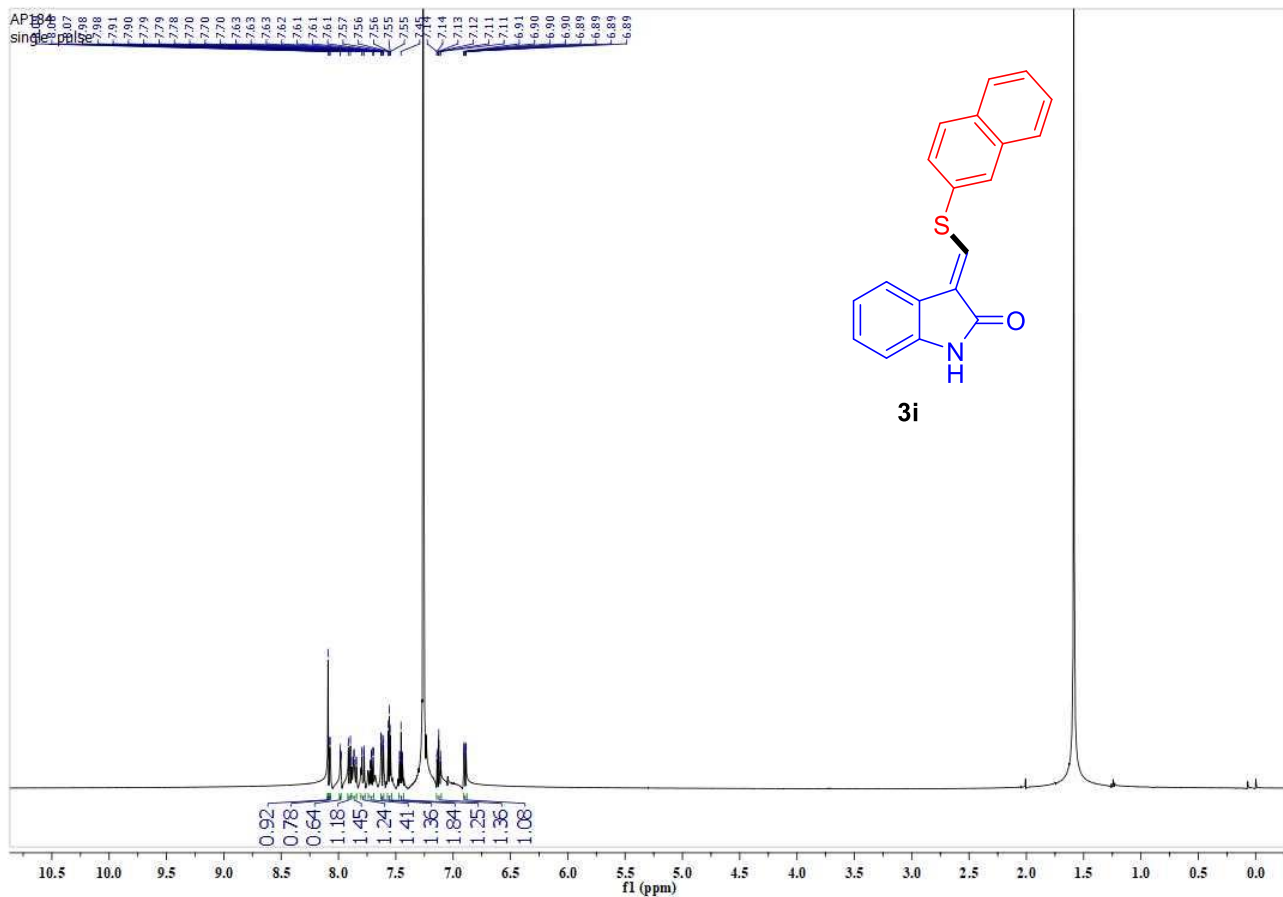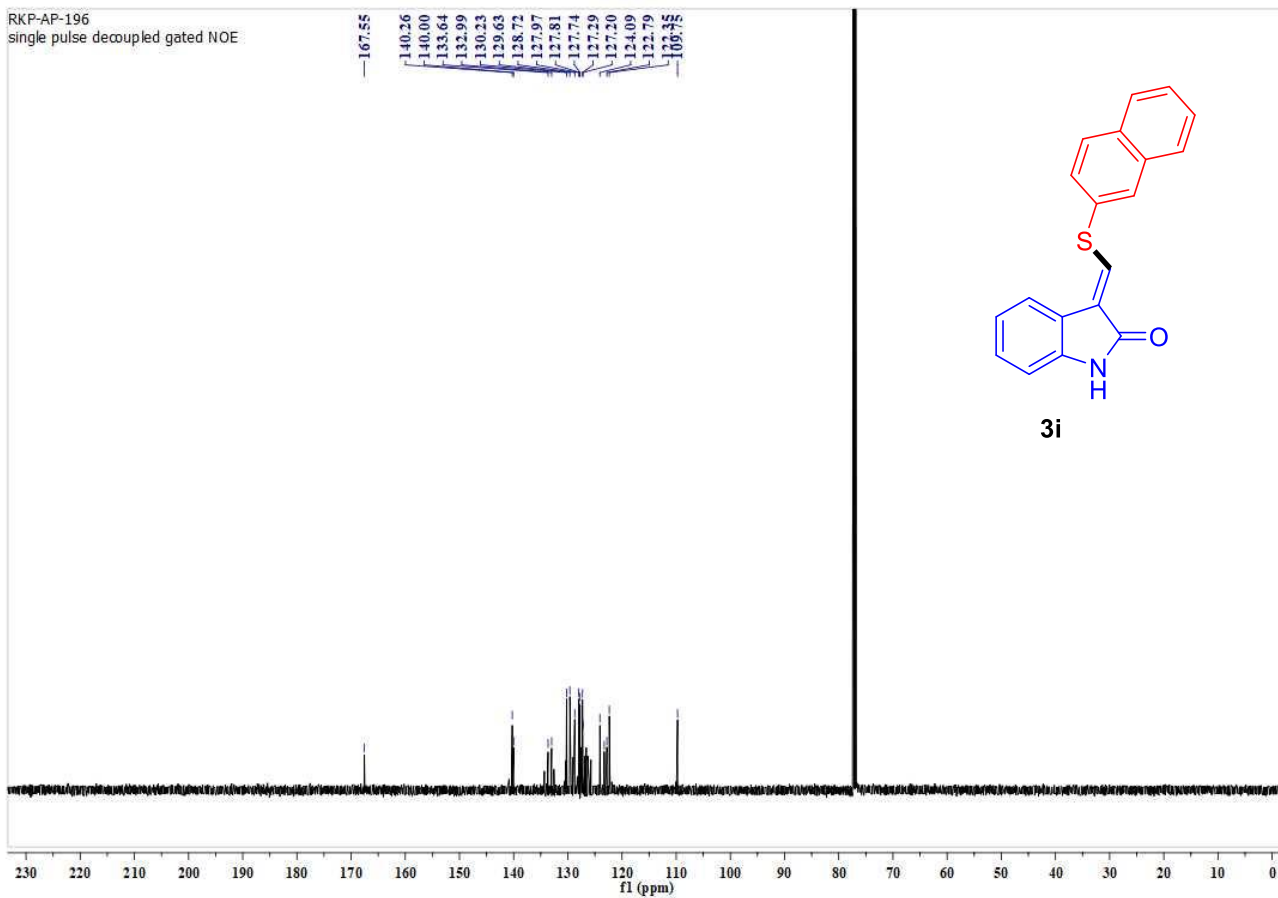



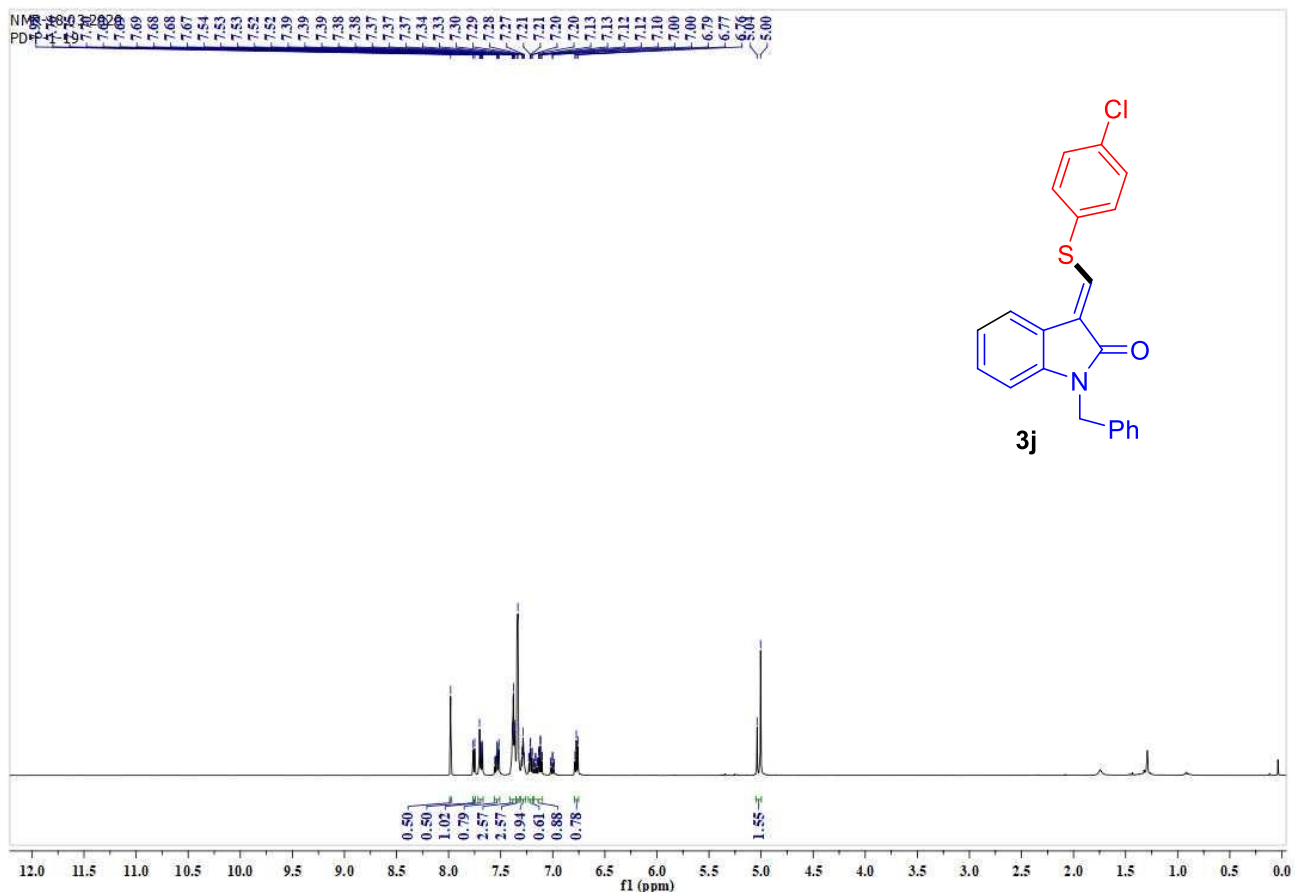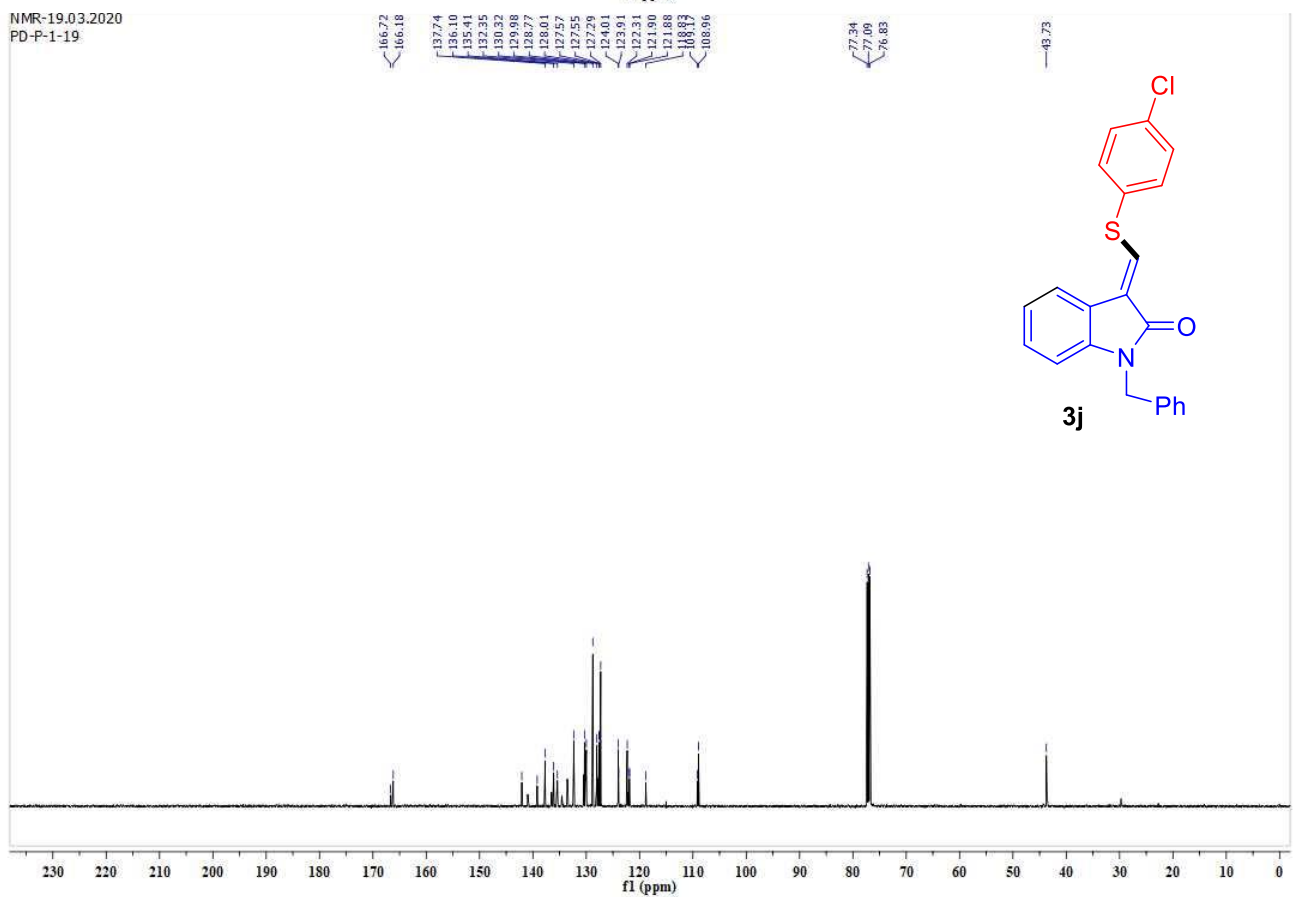

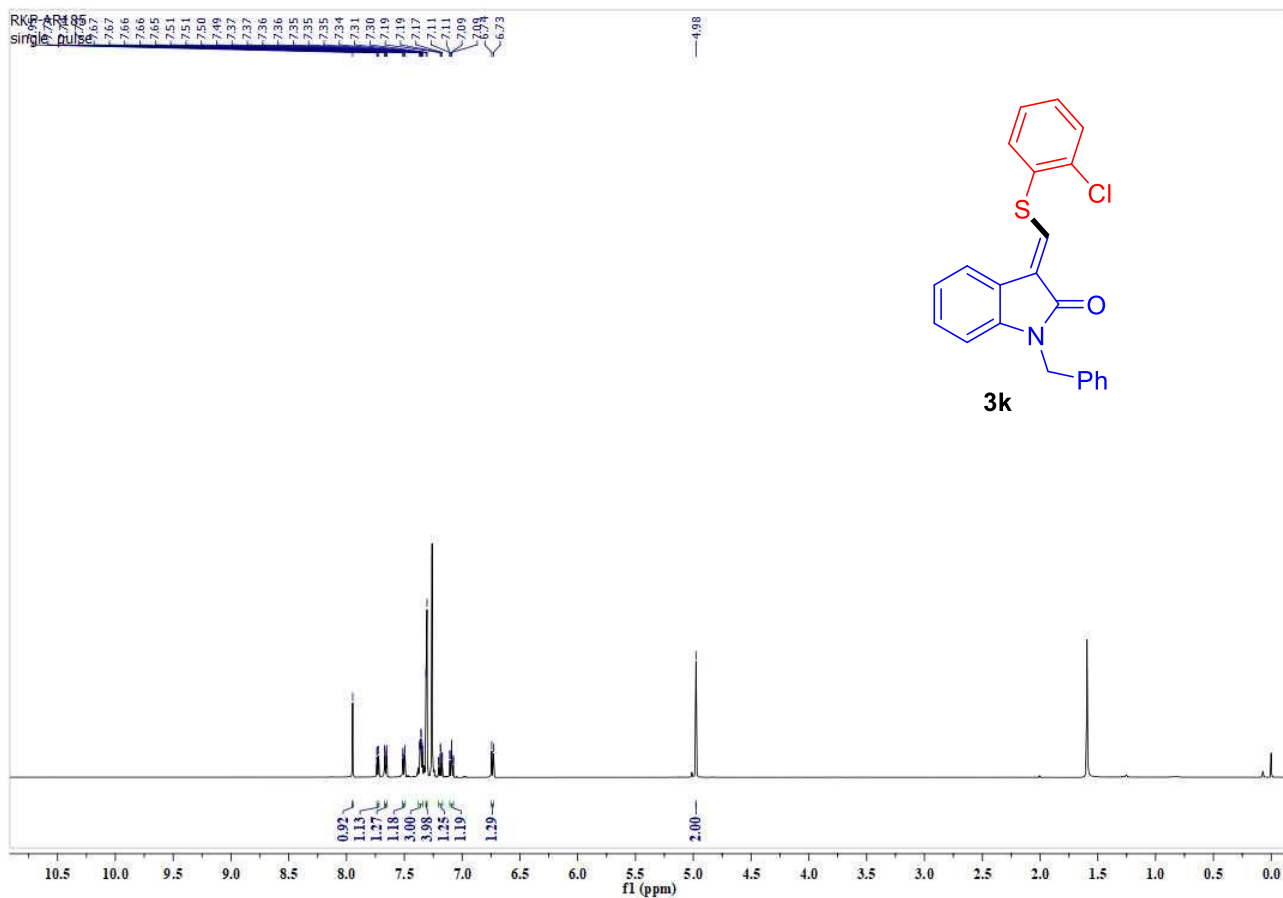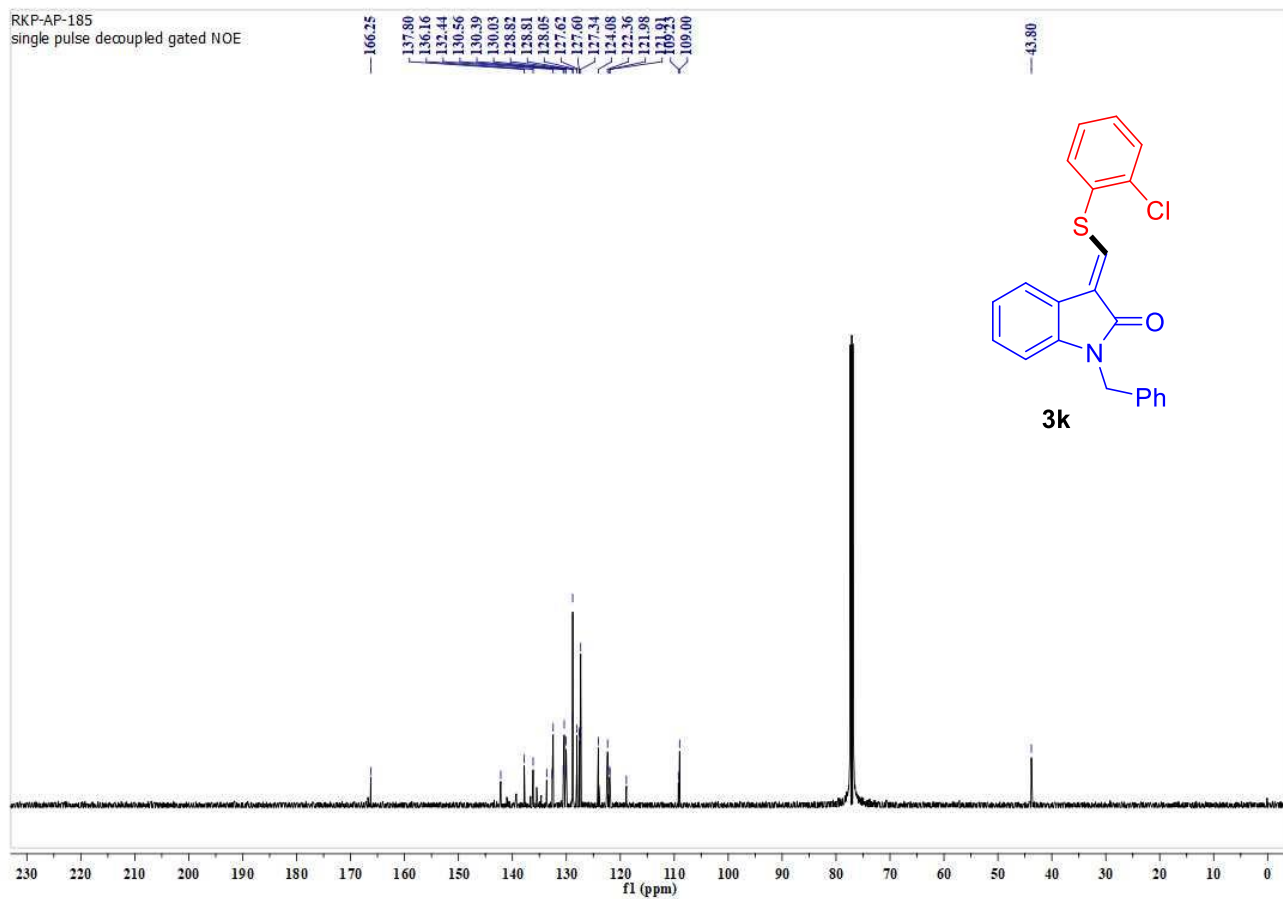

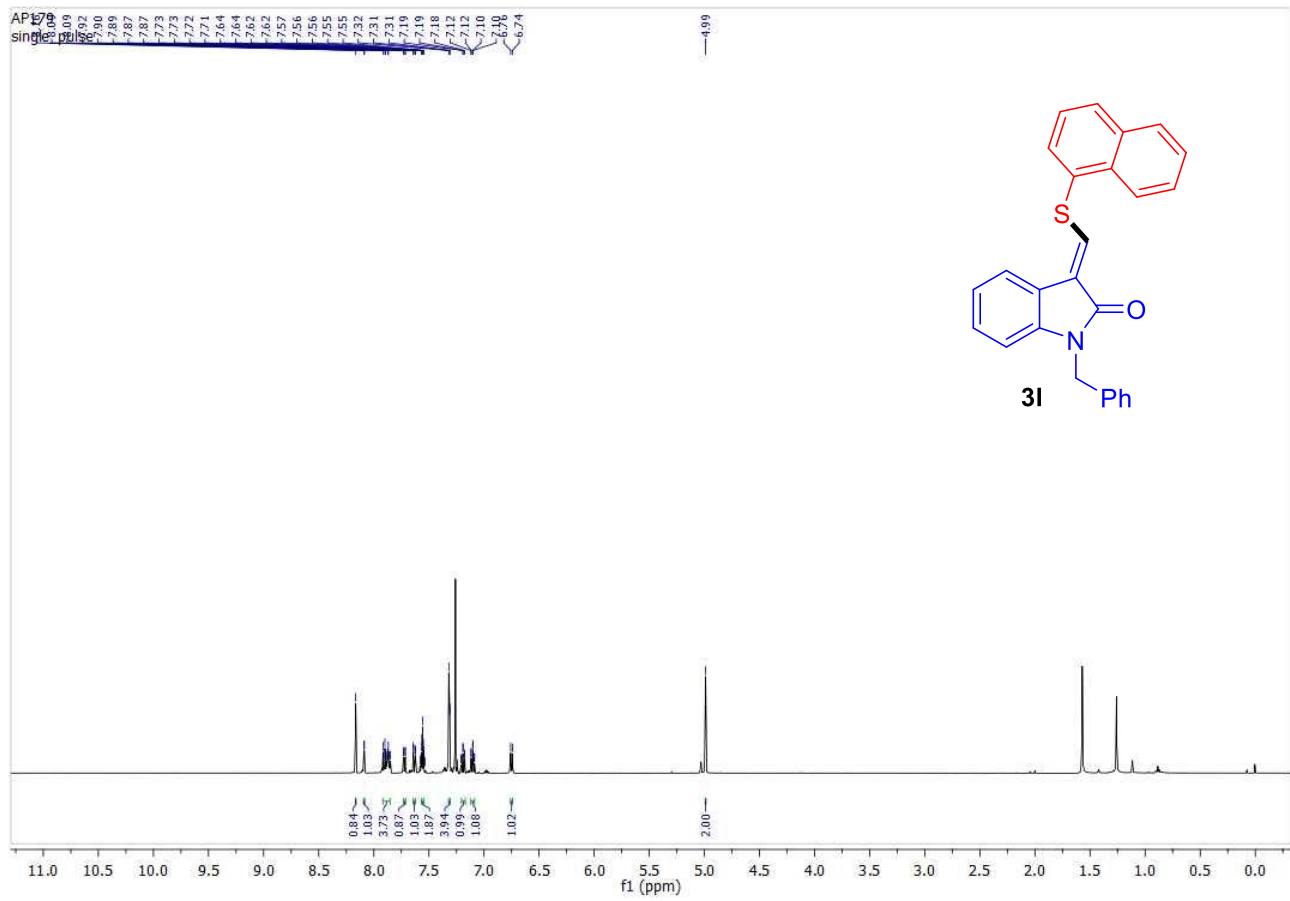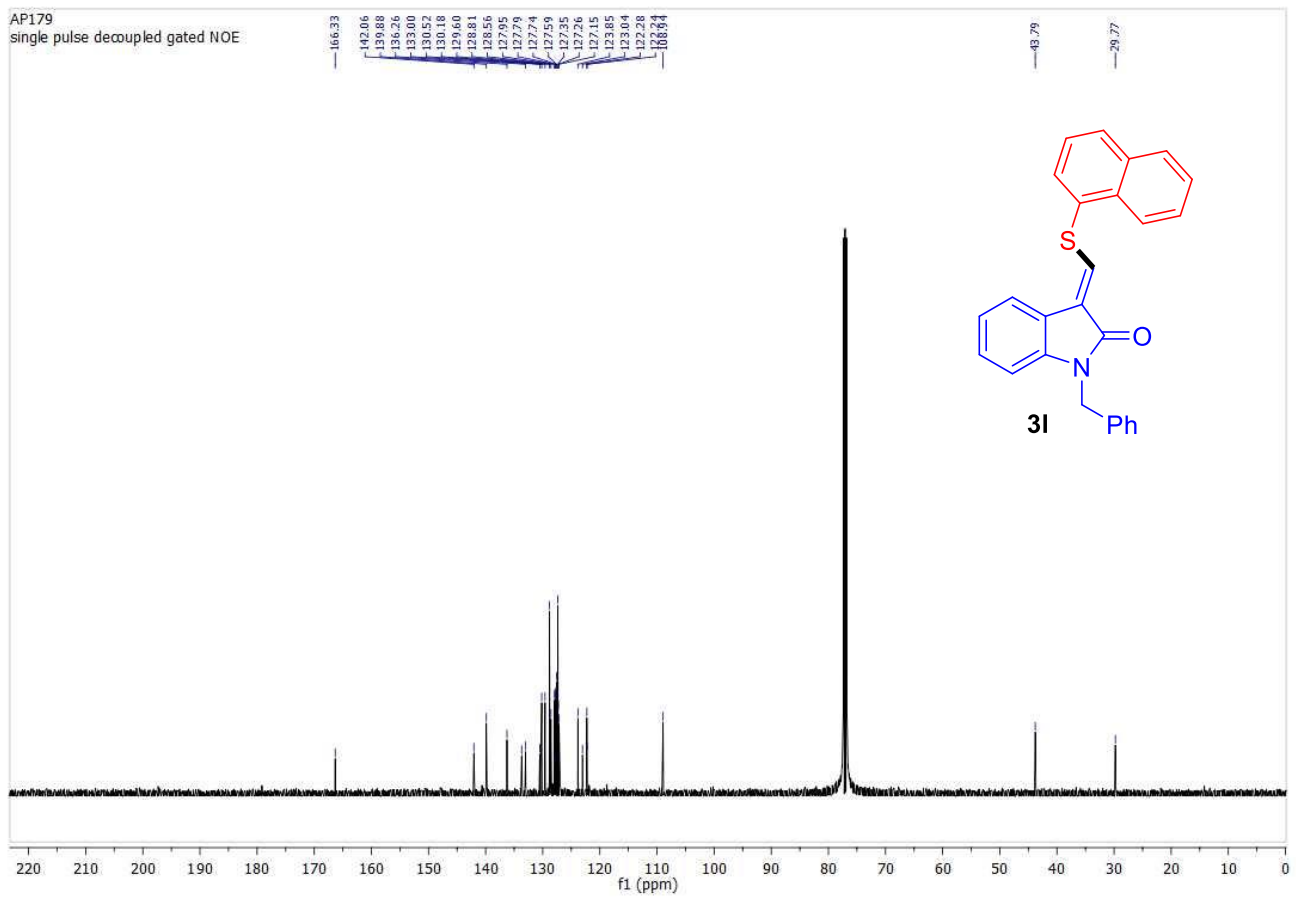

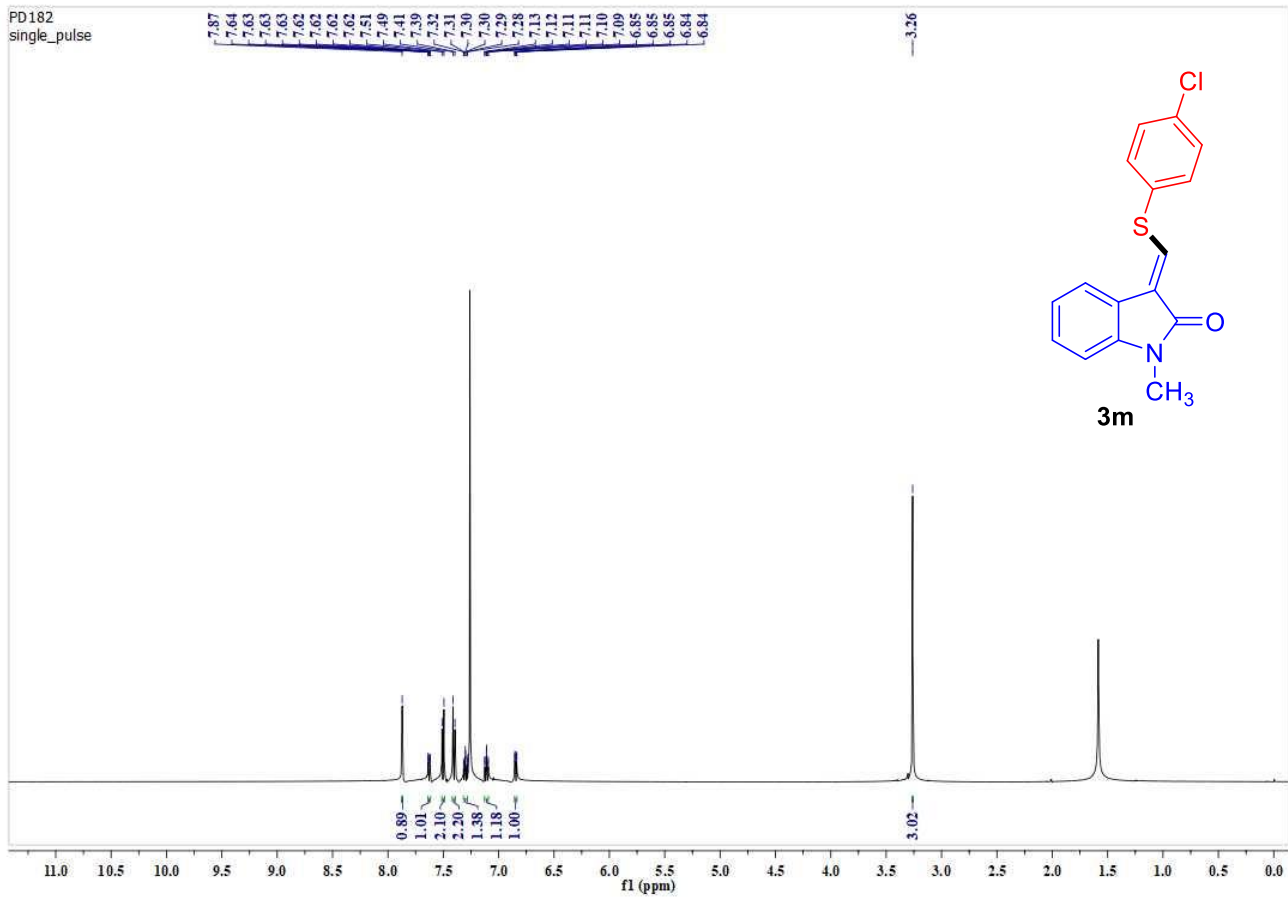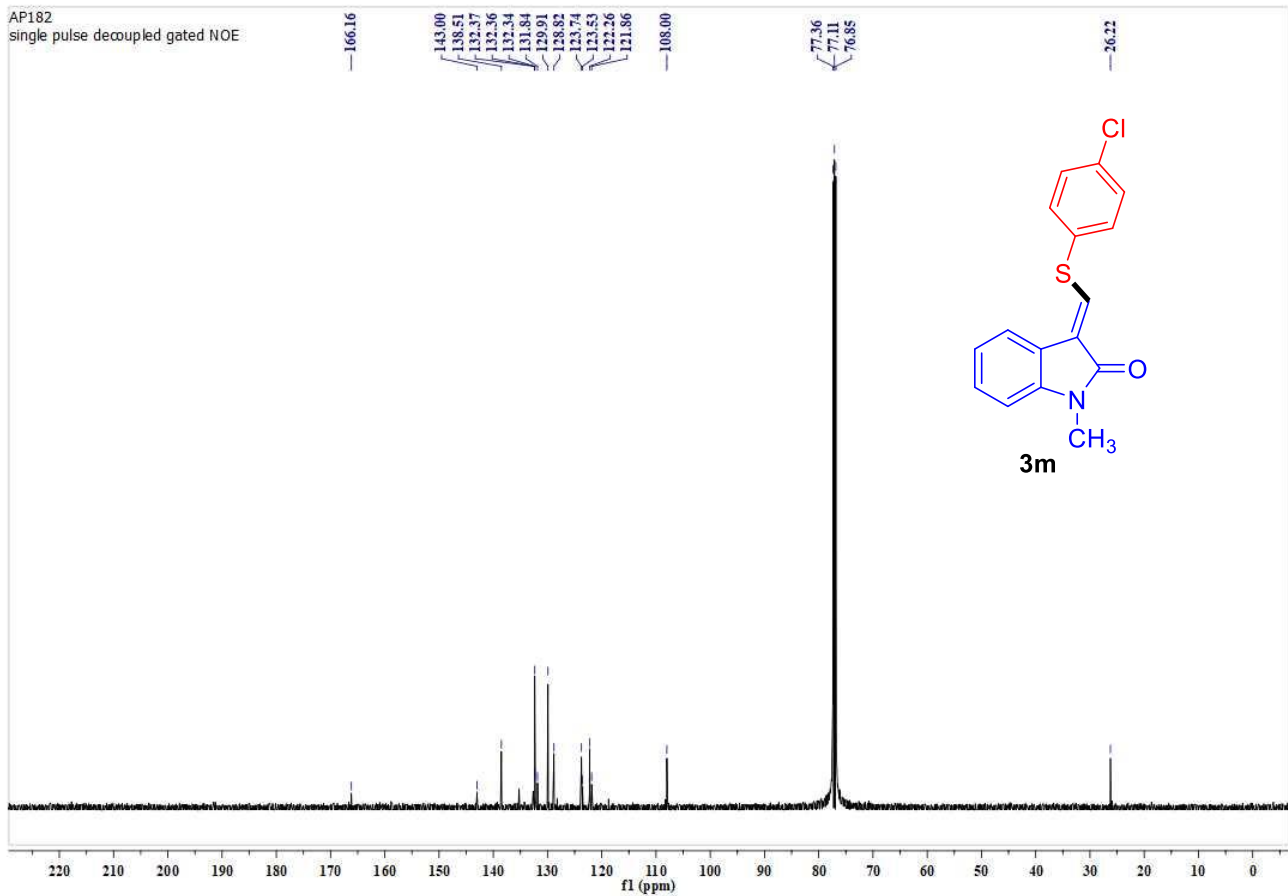

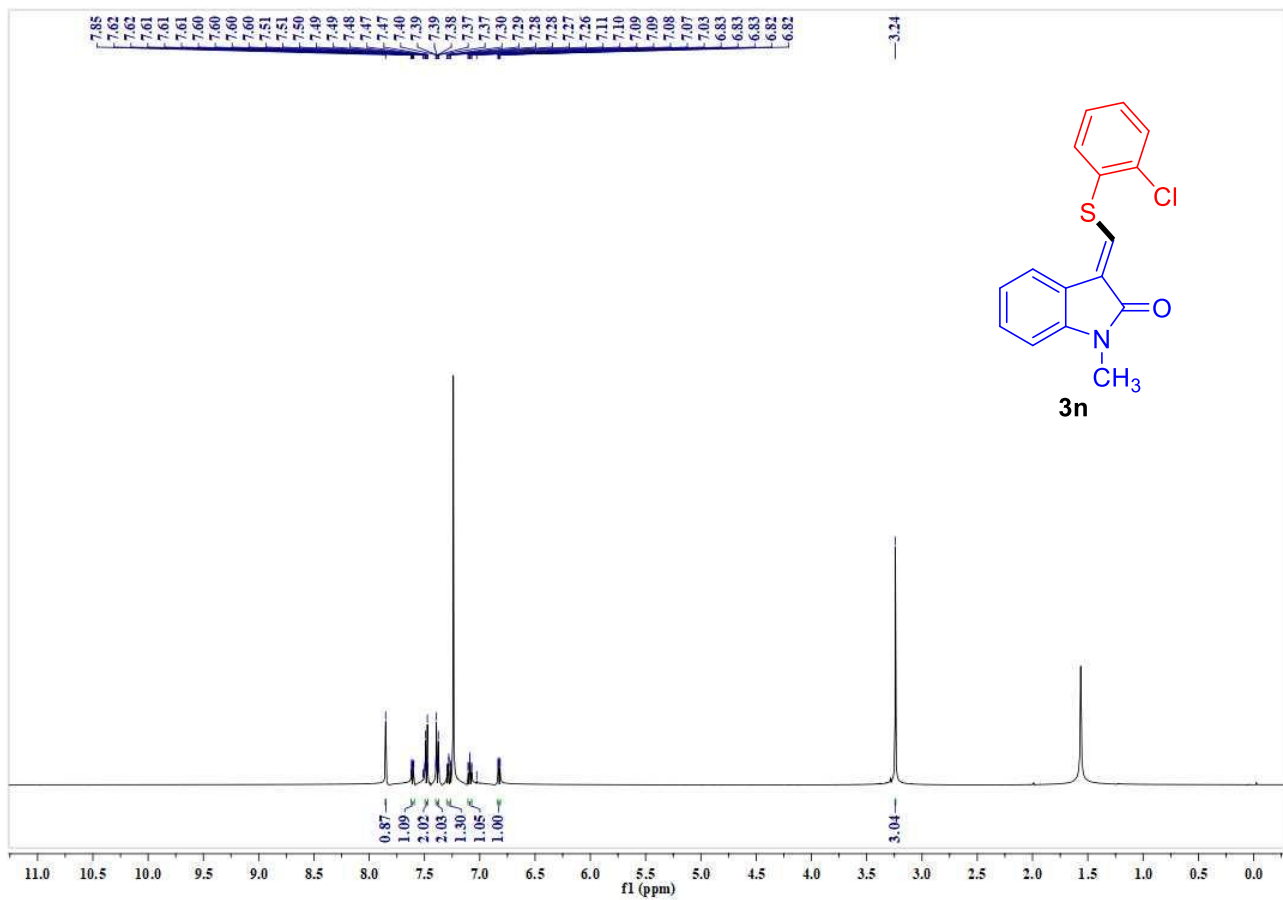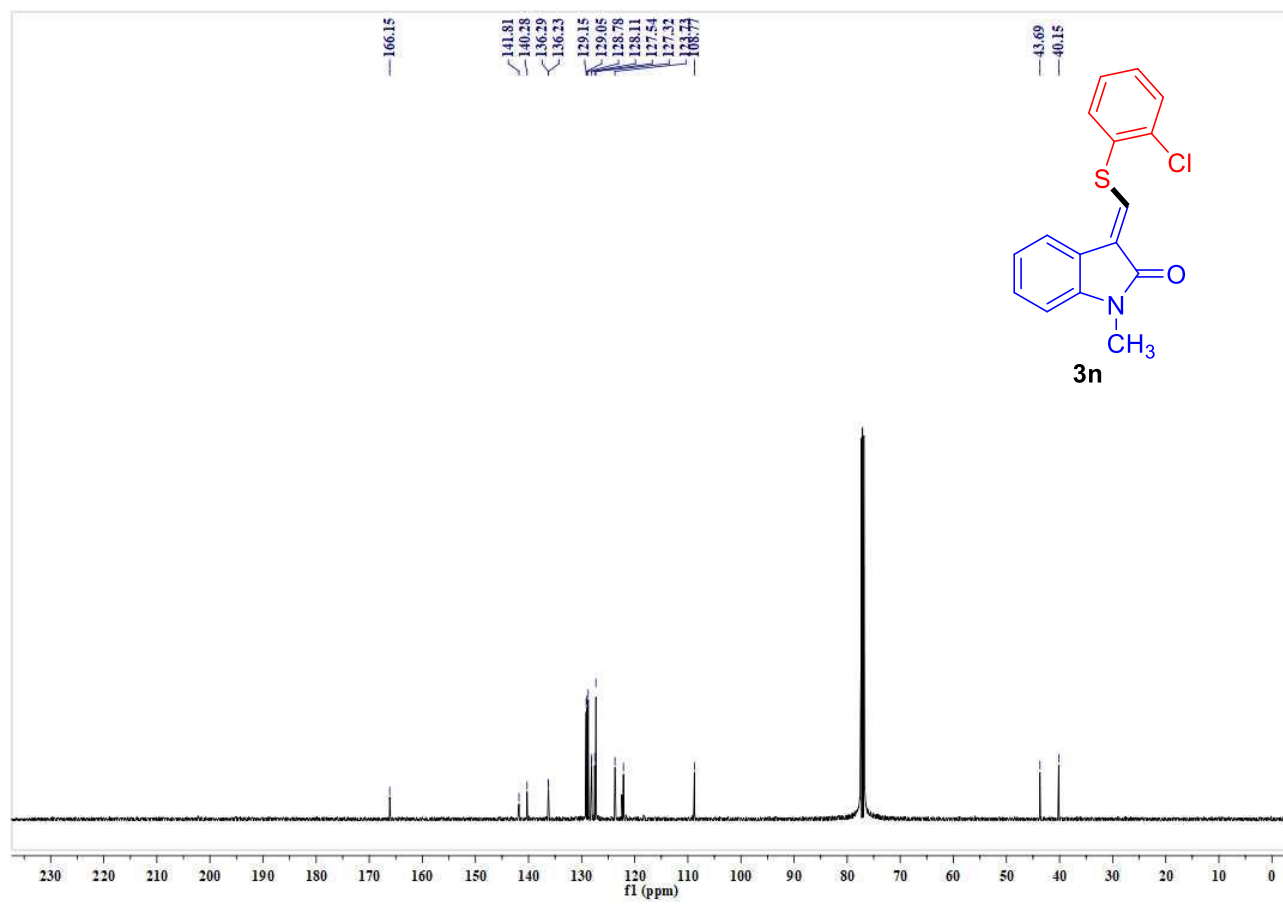

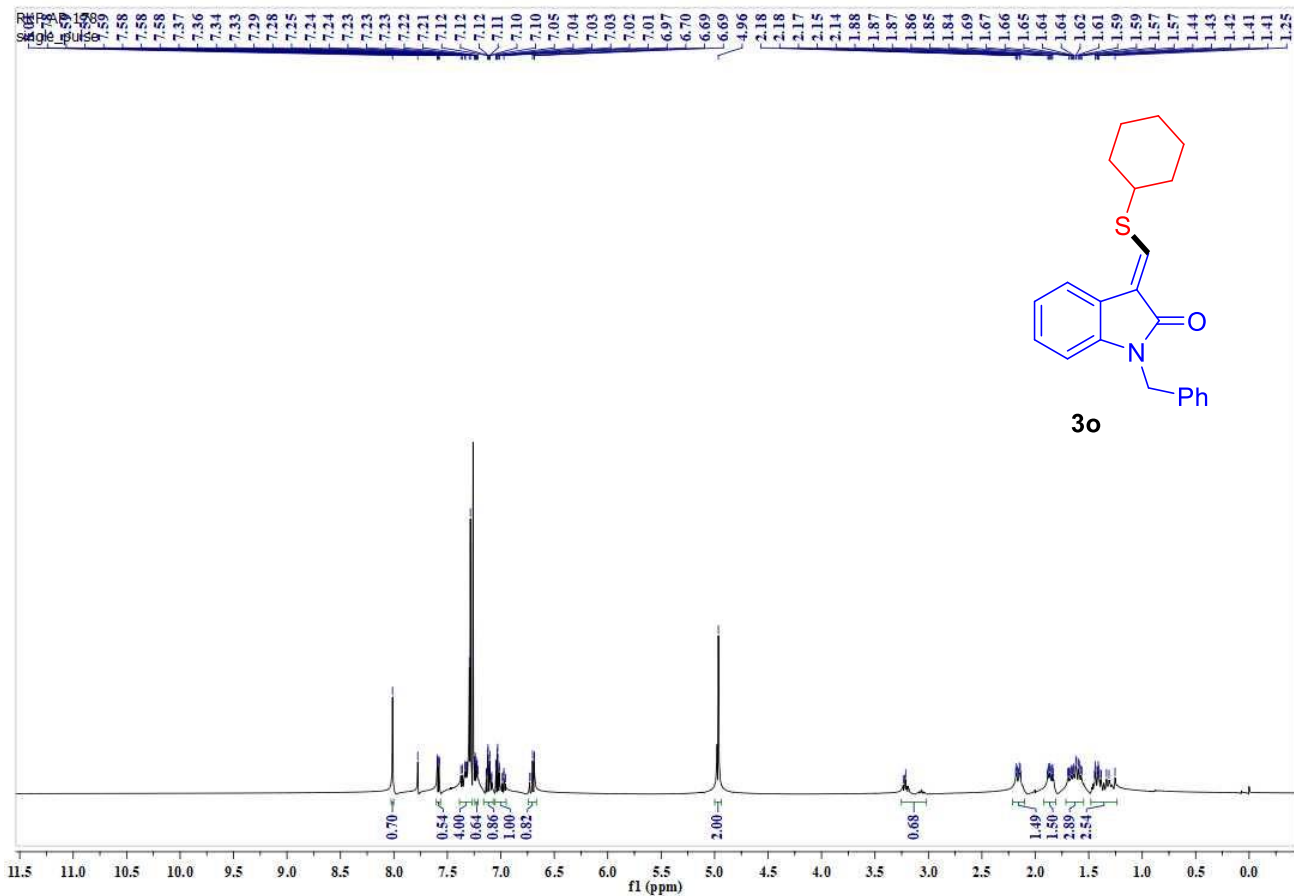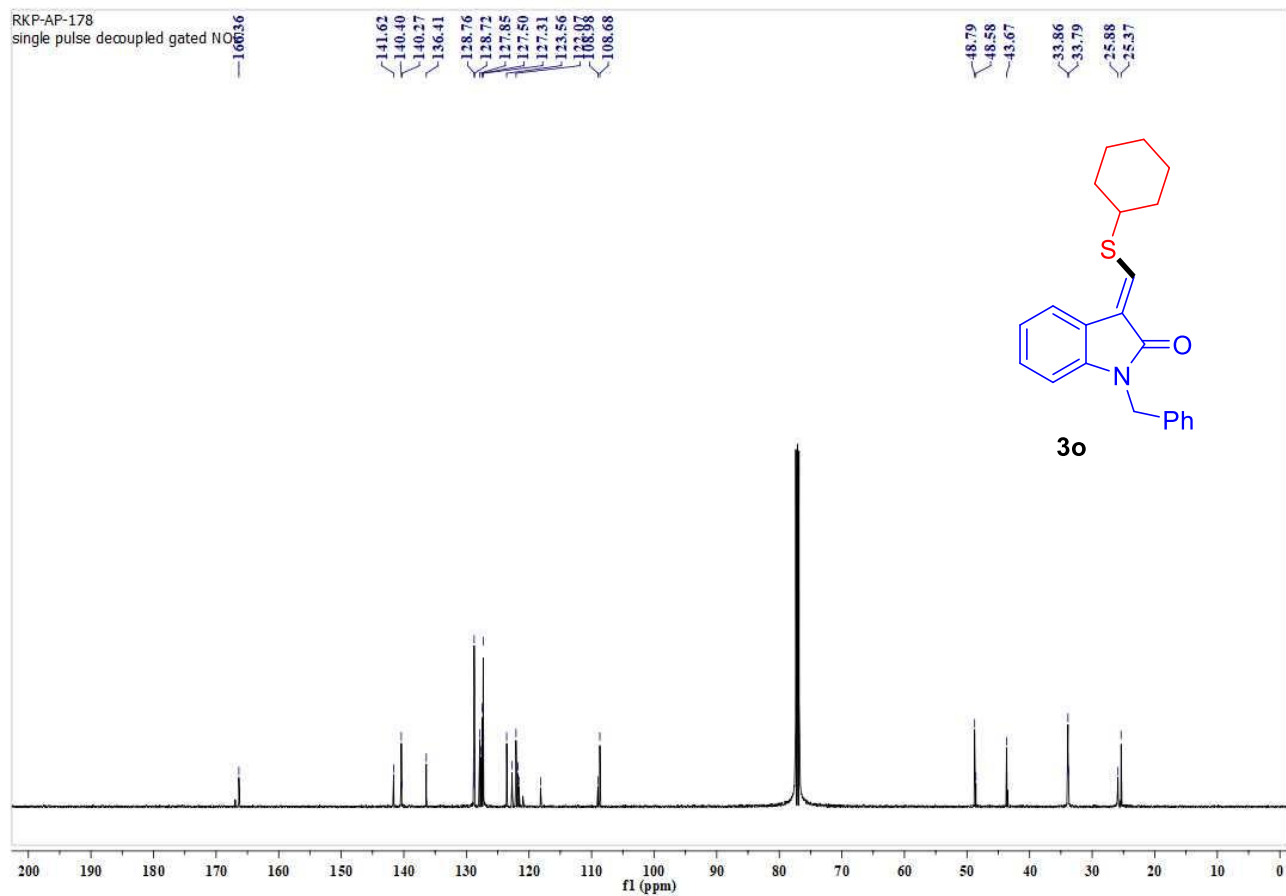

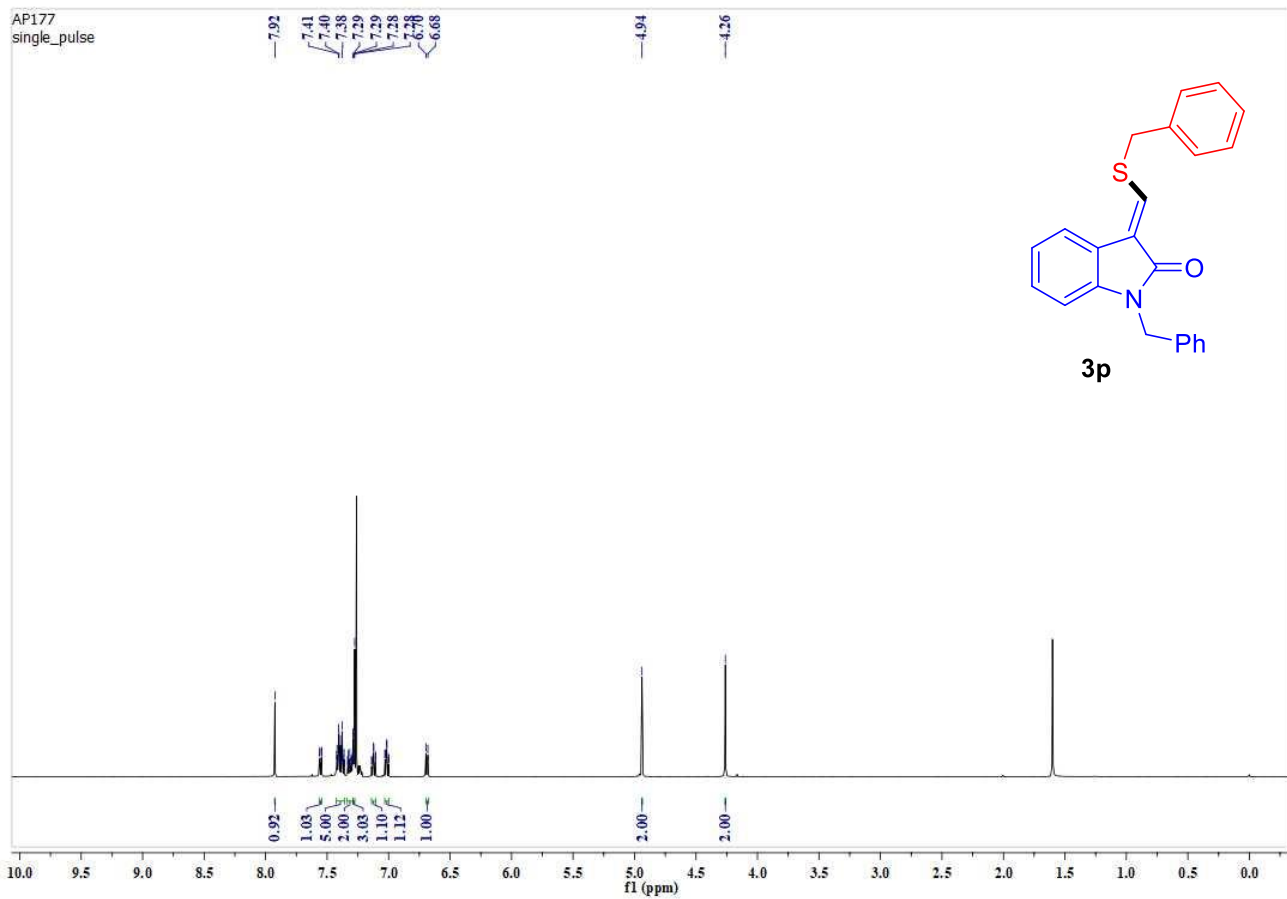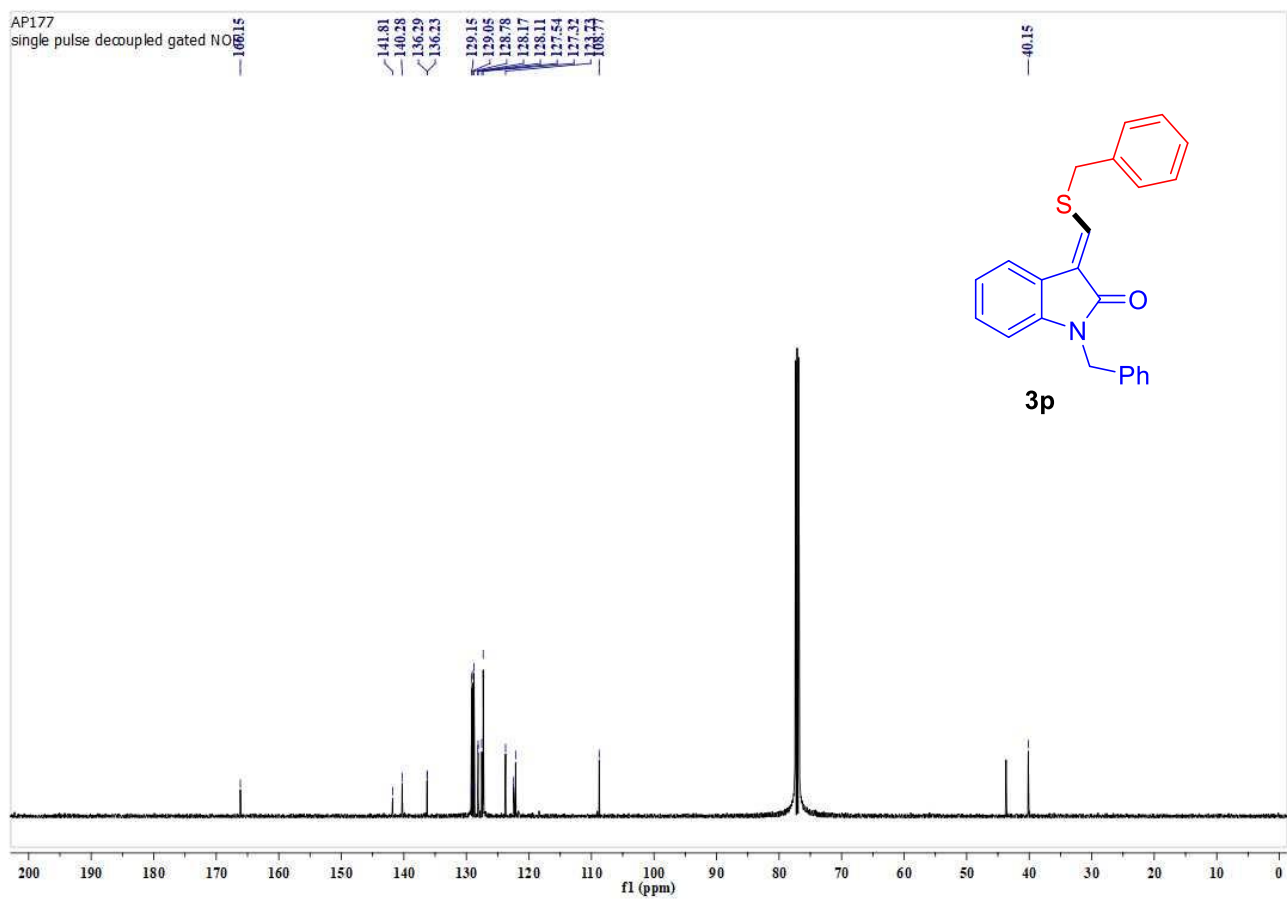

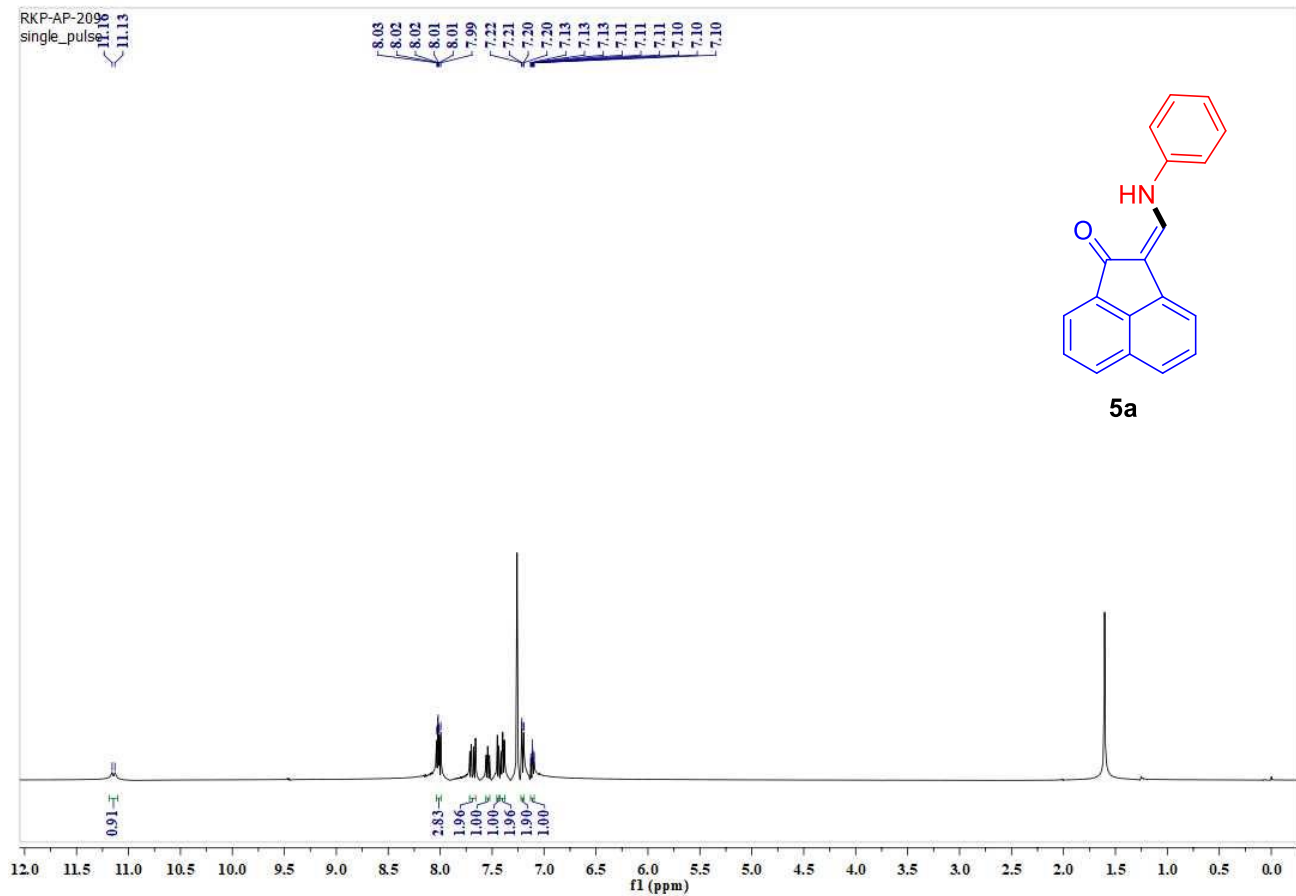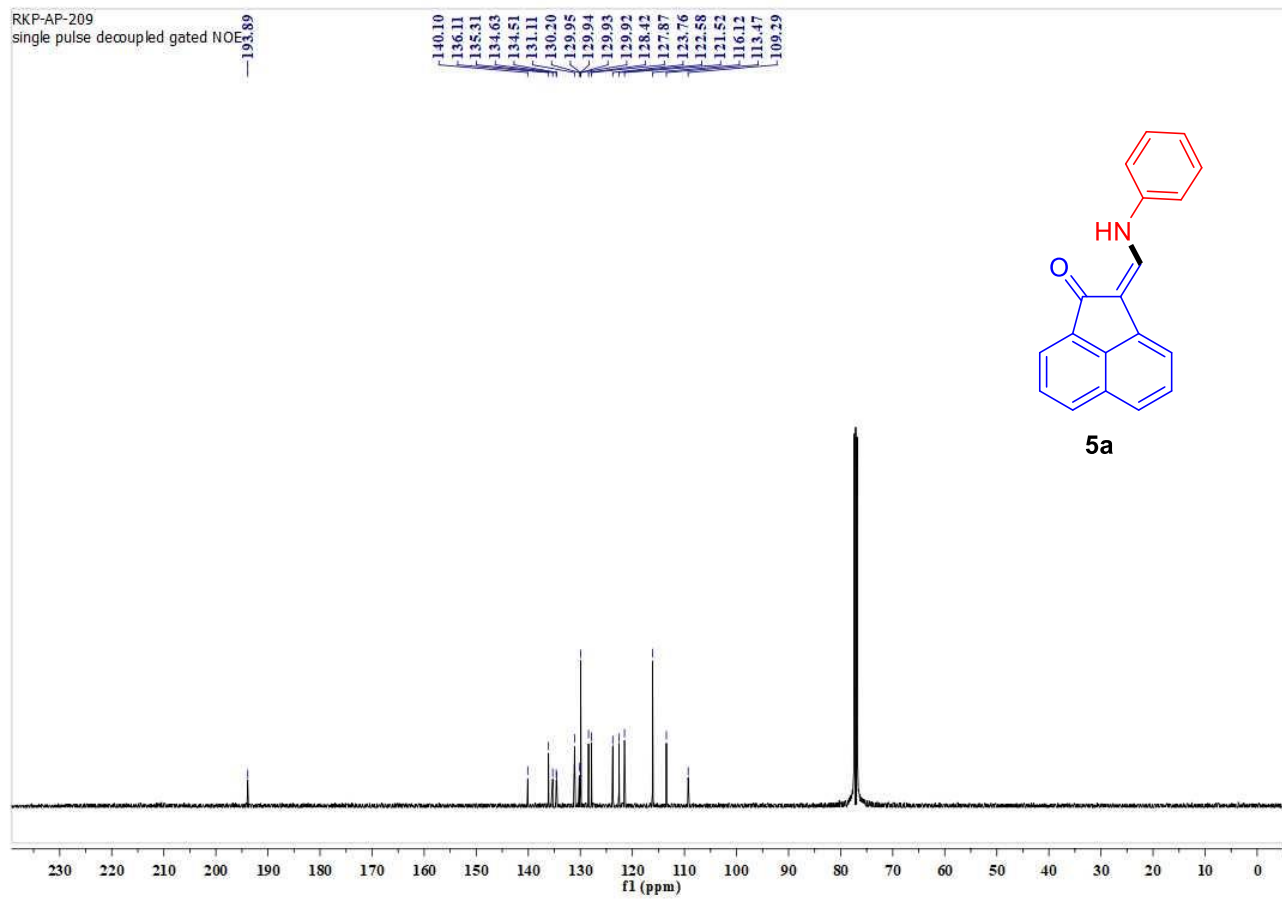



2NOV,2020  
PD423

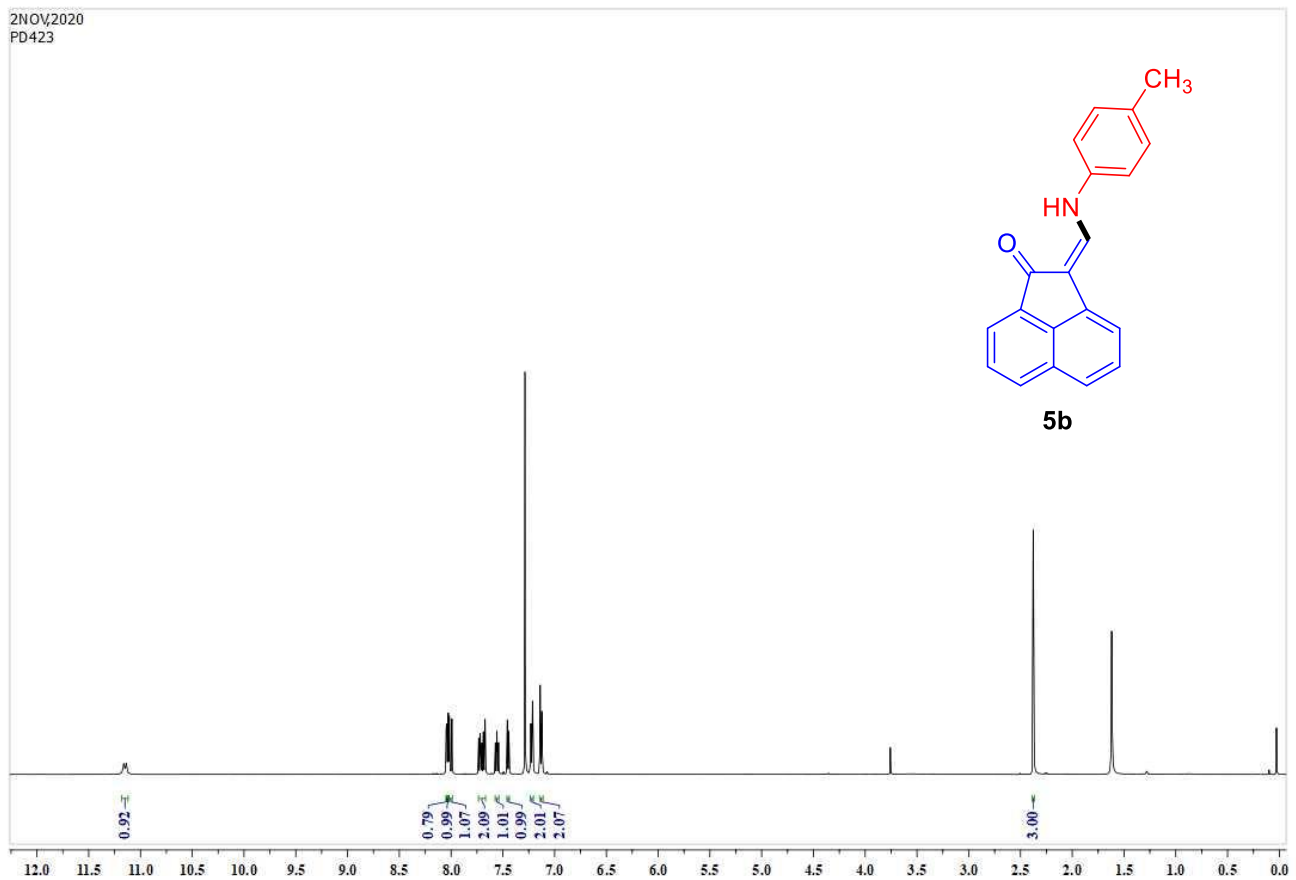

2NOV,2020  
PD423

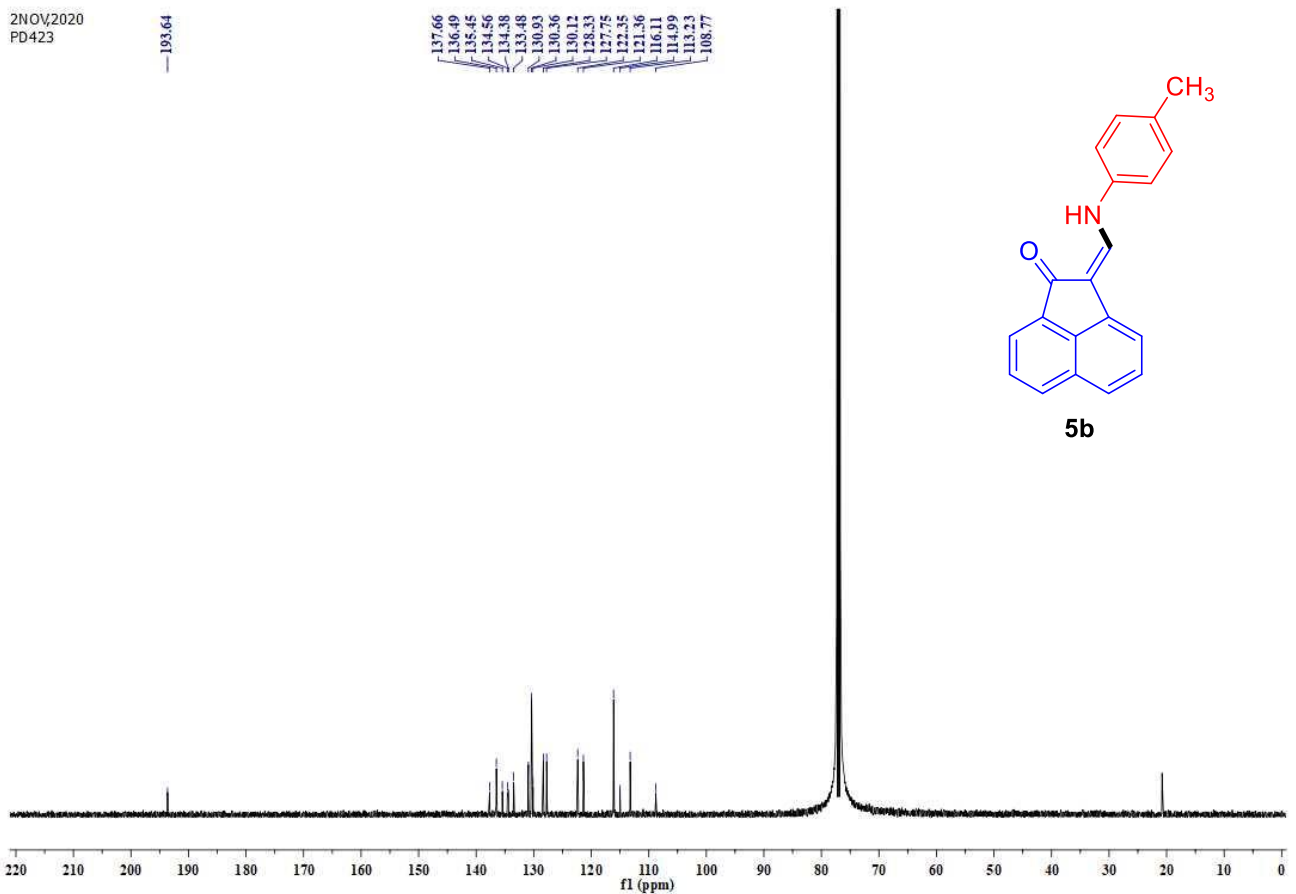

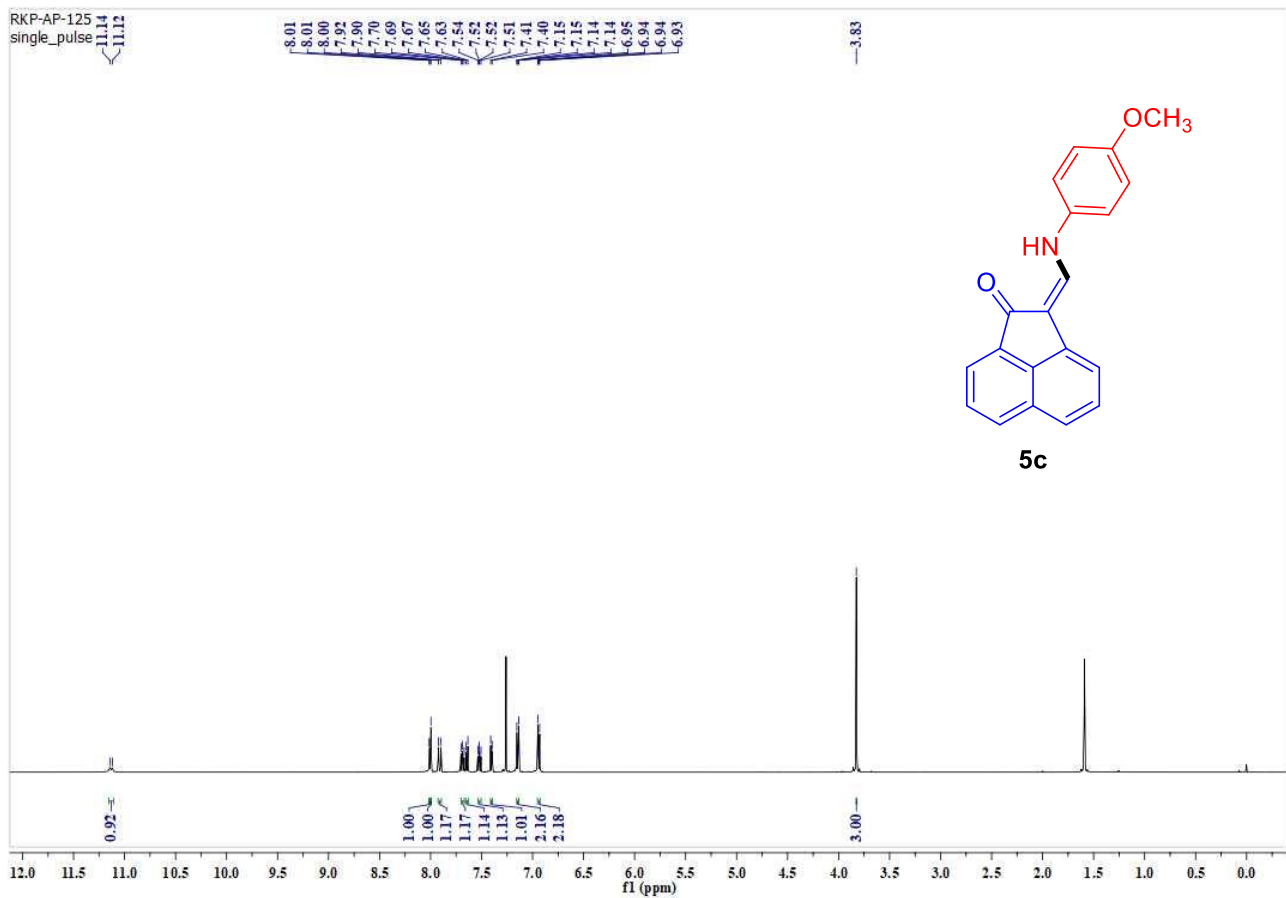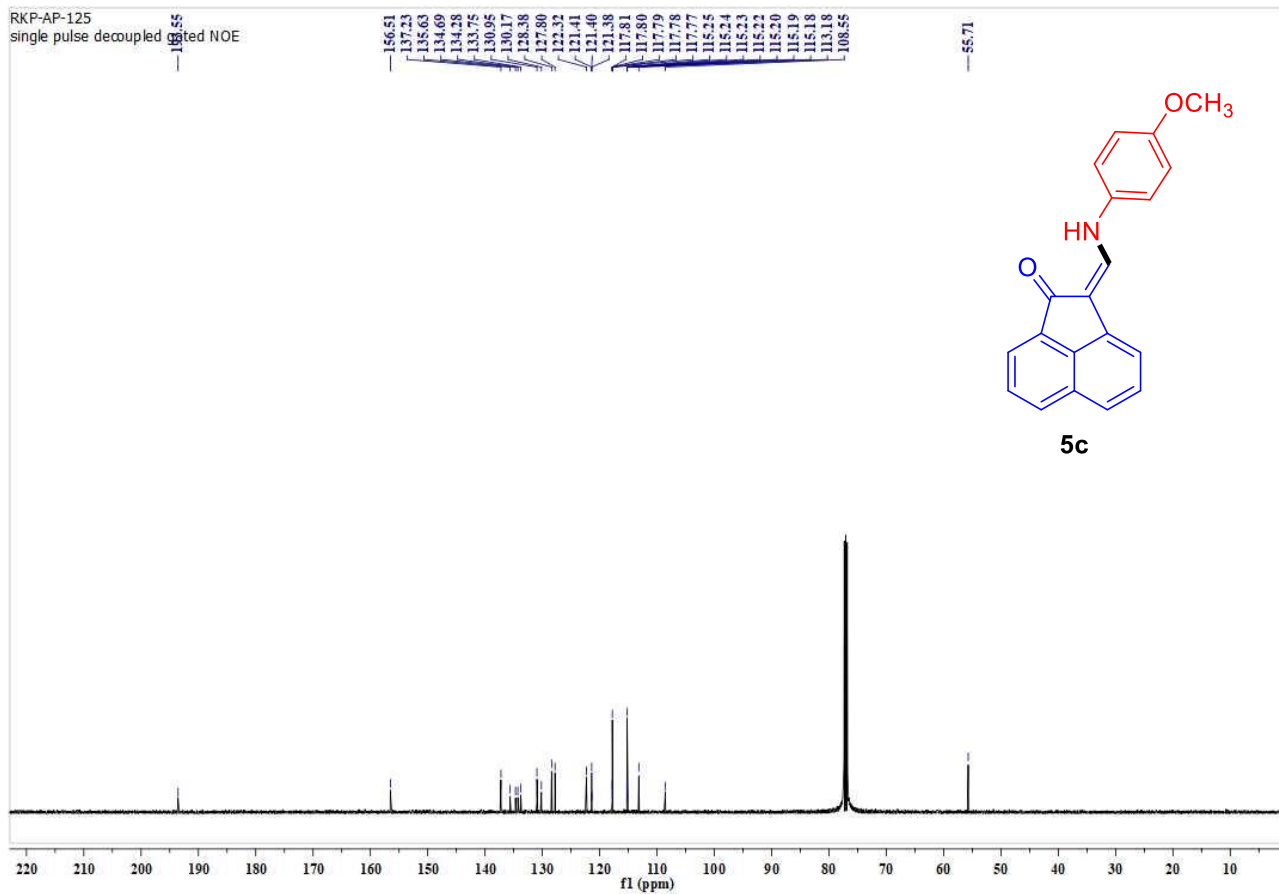

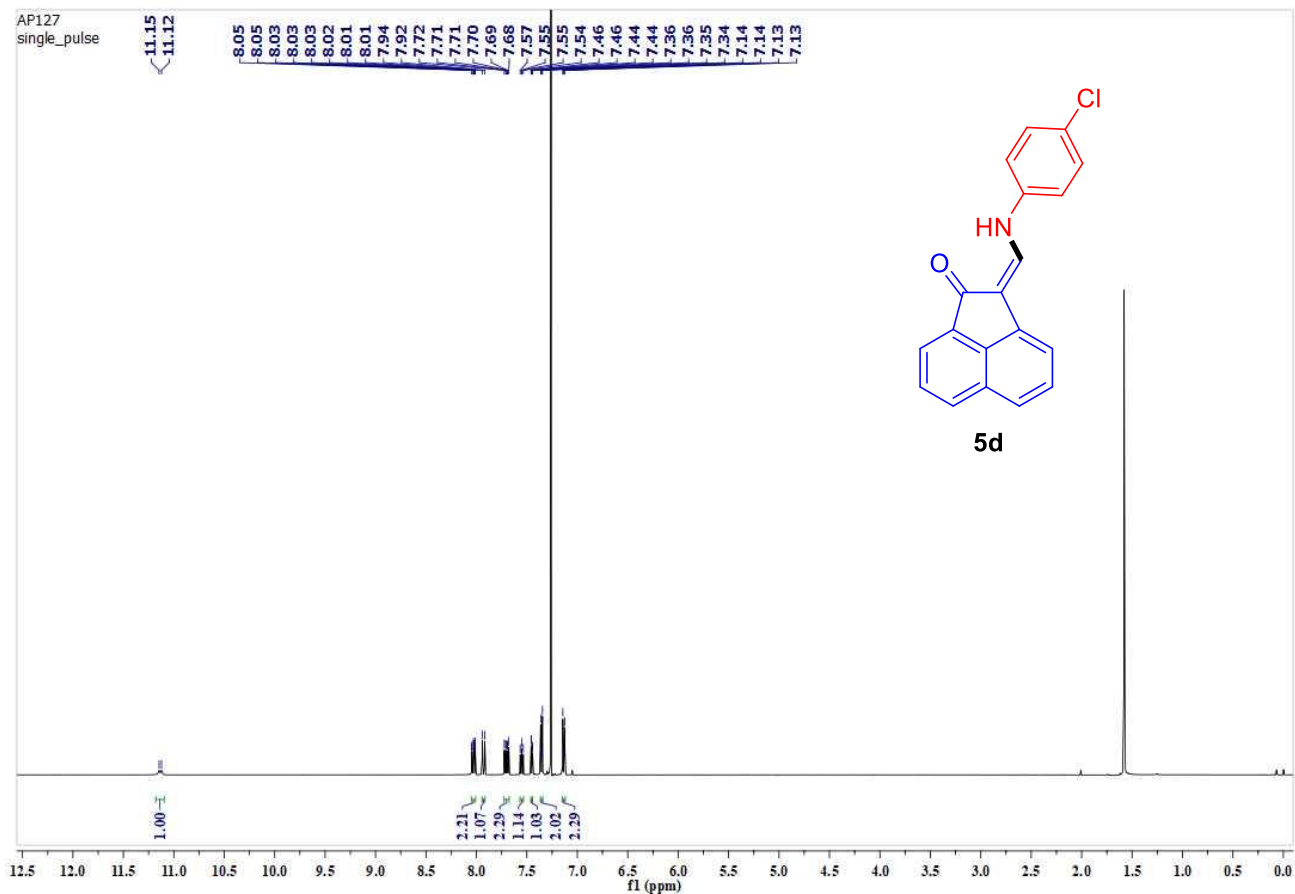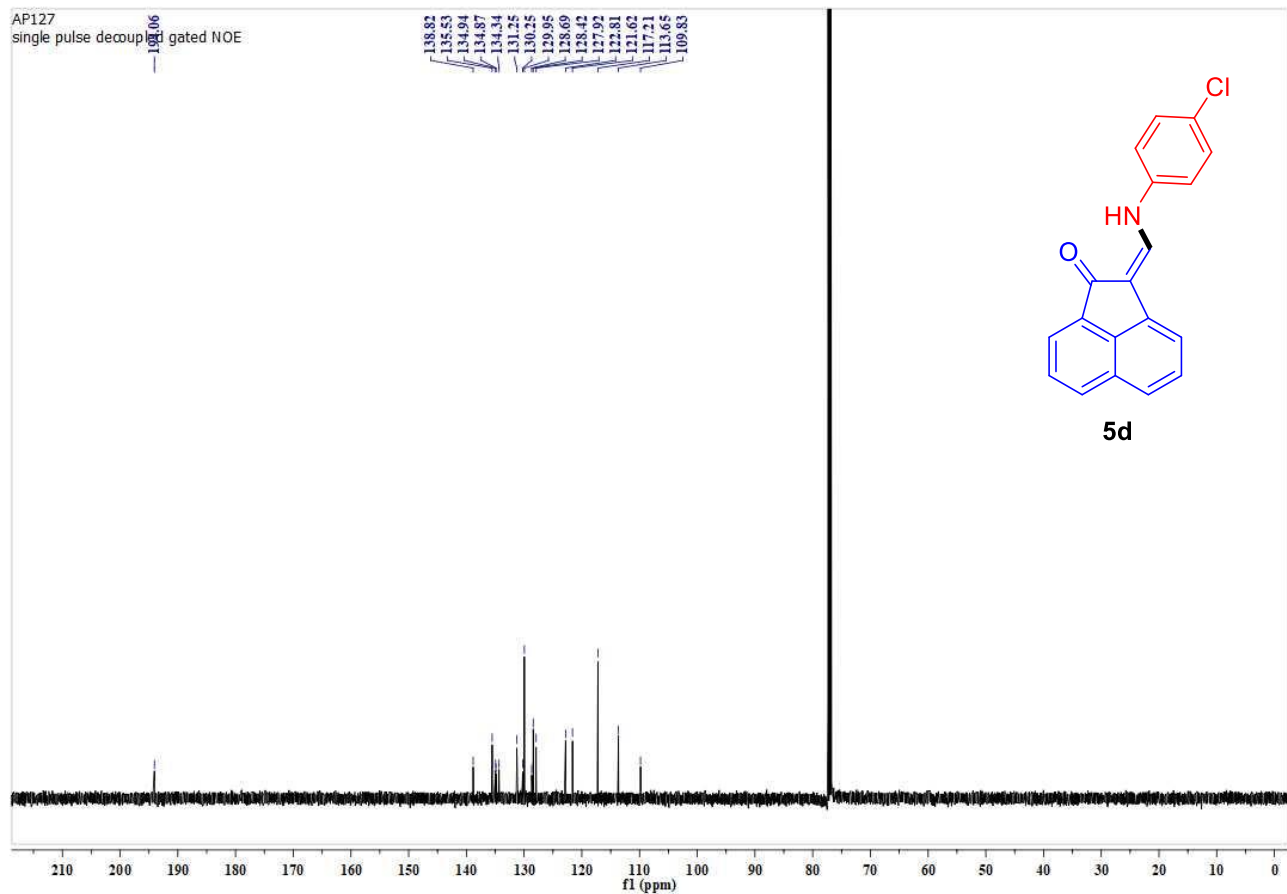

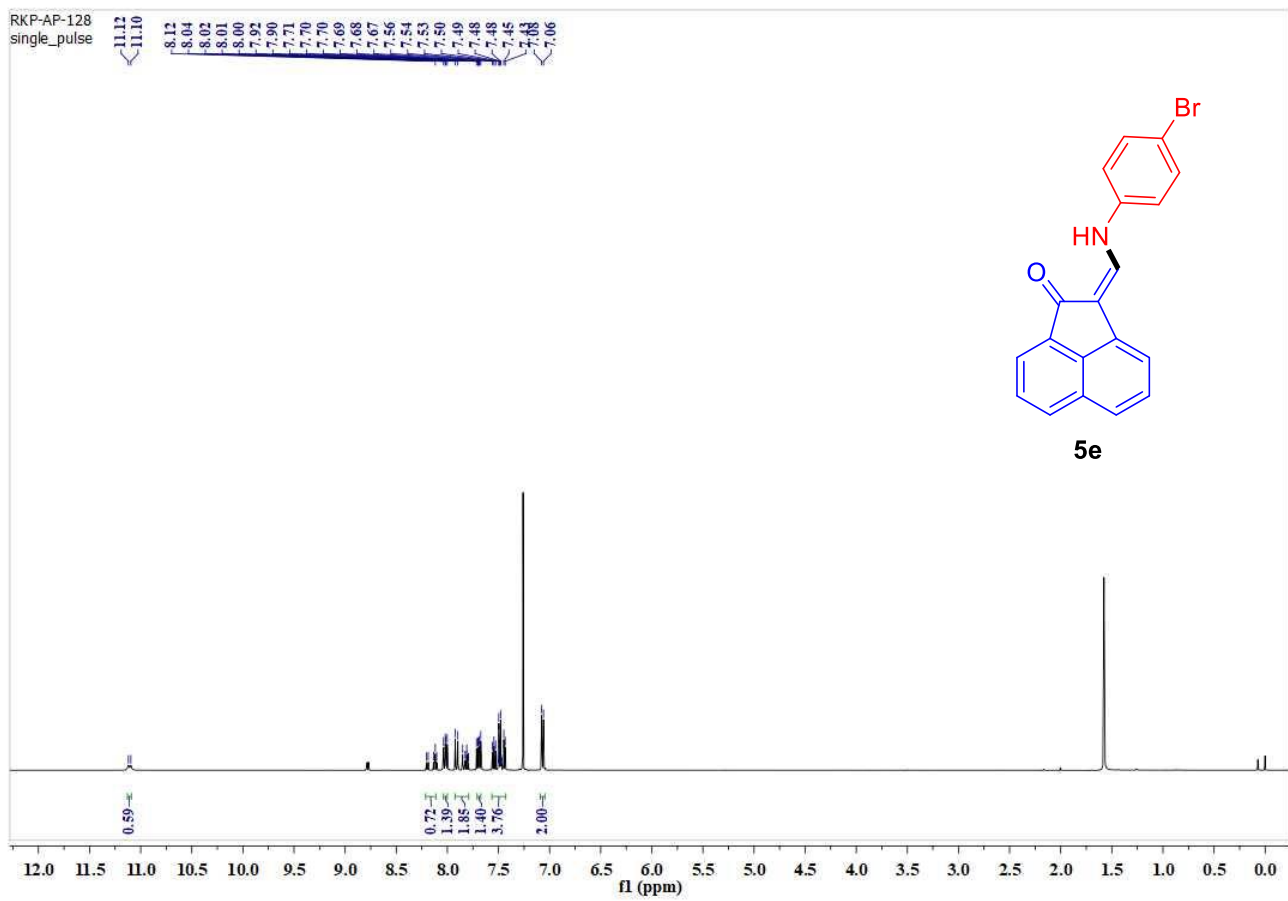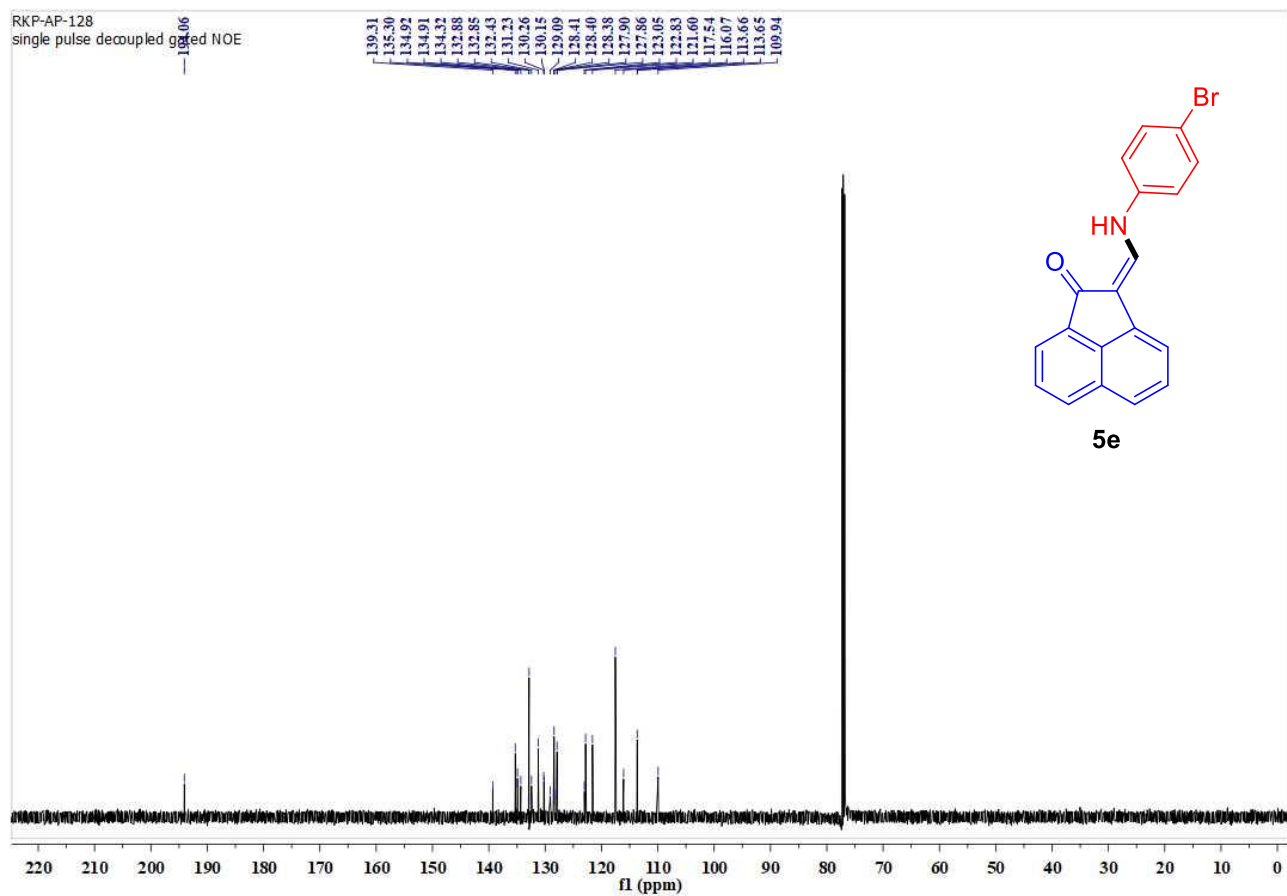

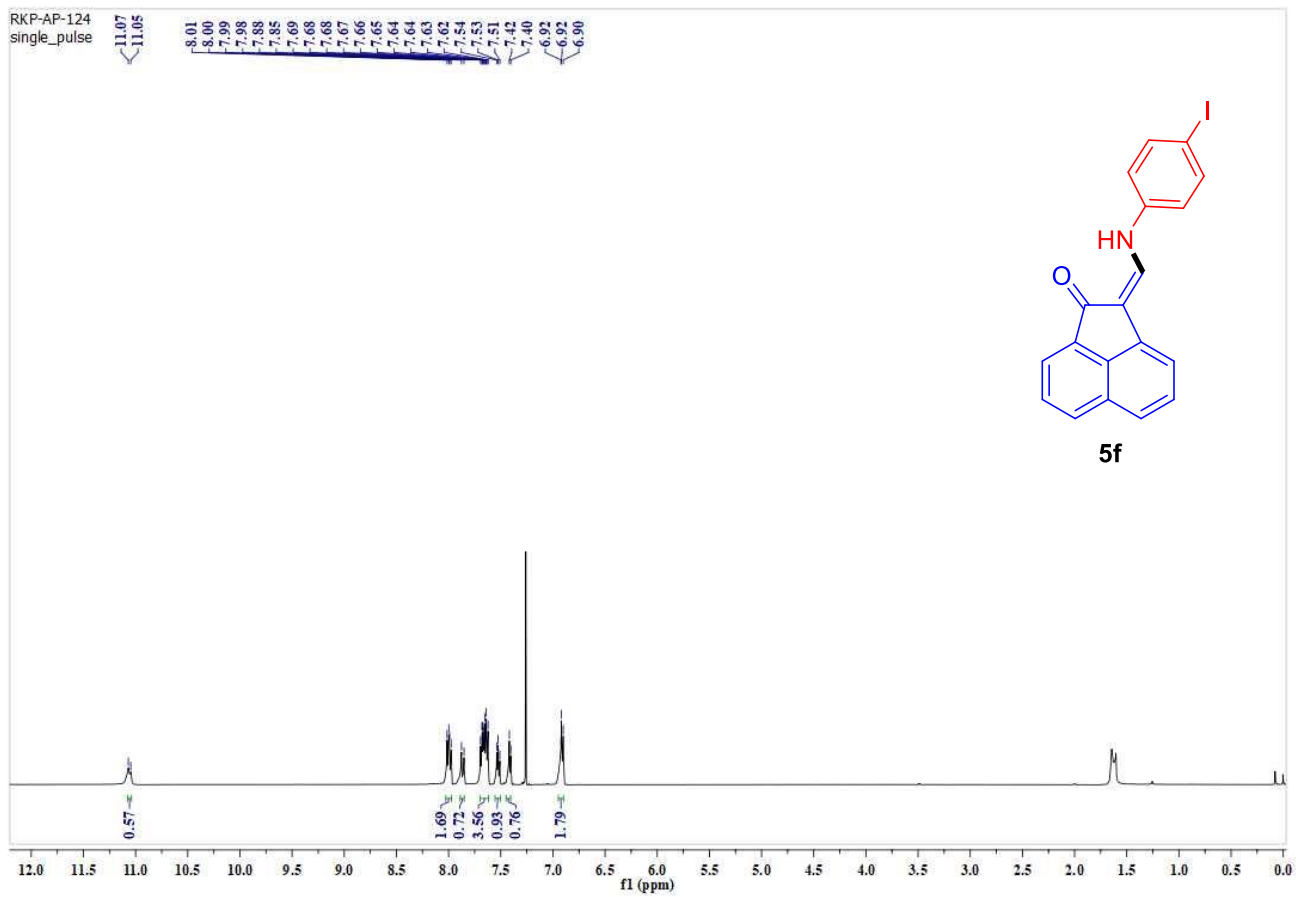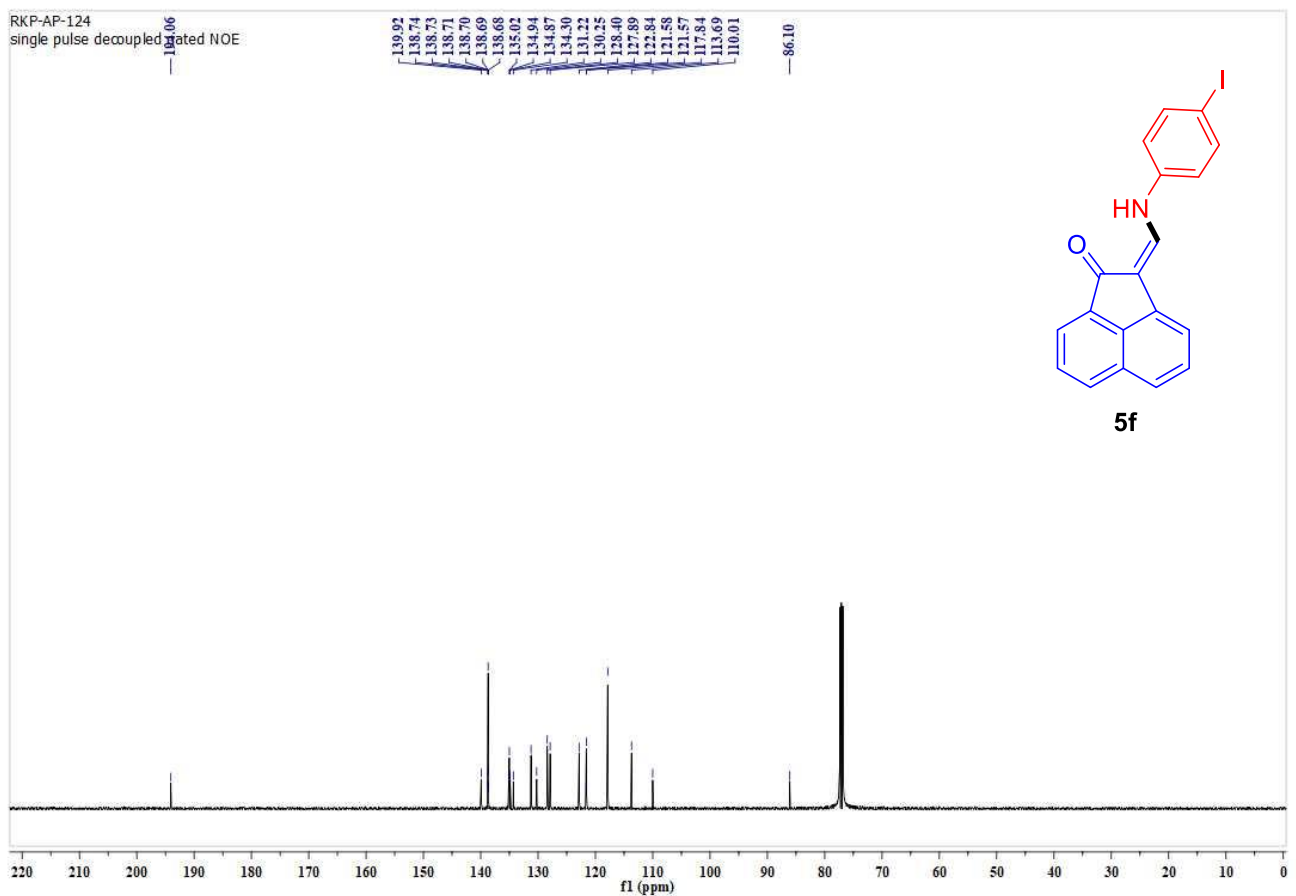

2NOV2020  
PD426

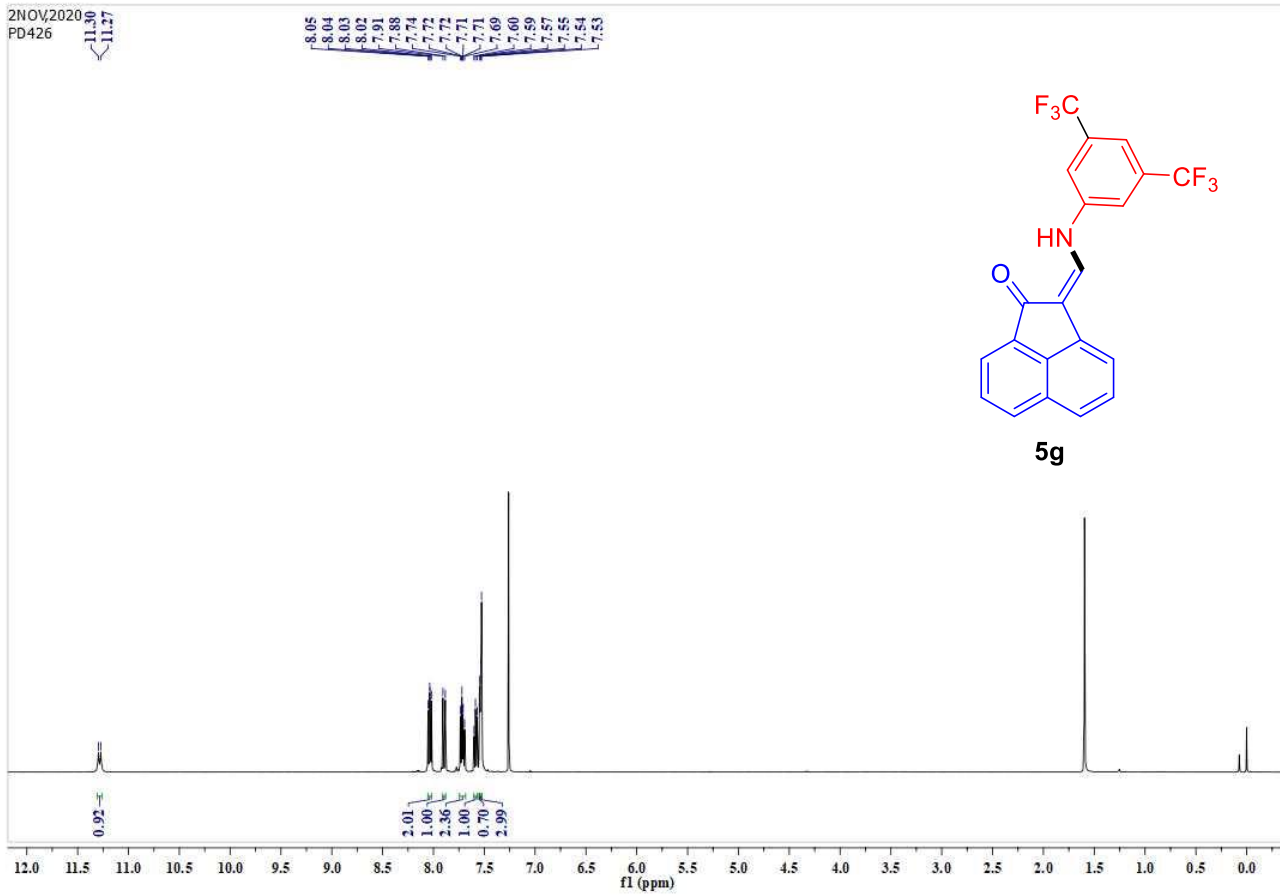

2NOV2020  
PD426

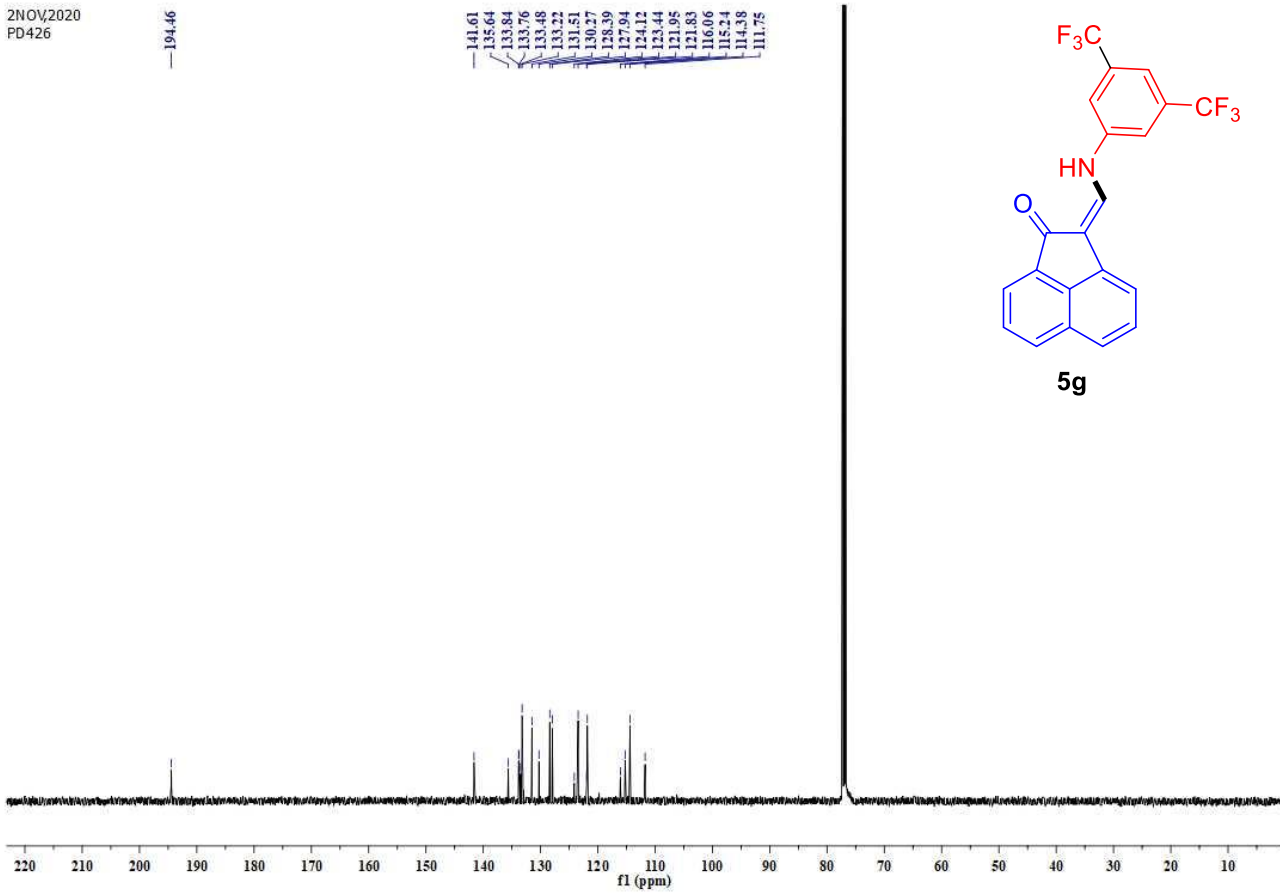

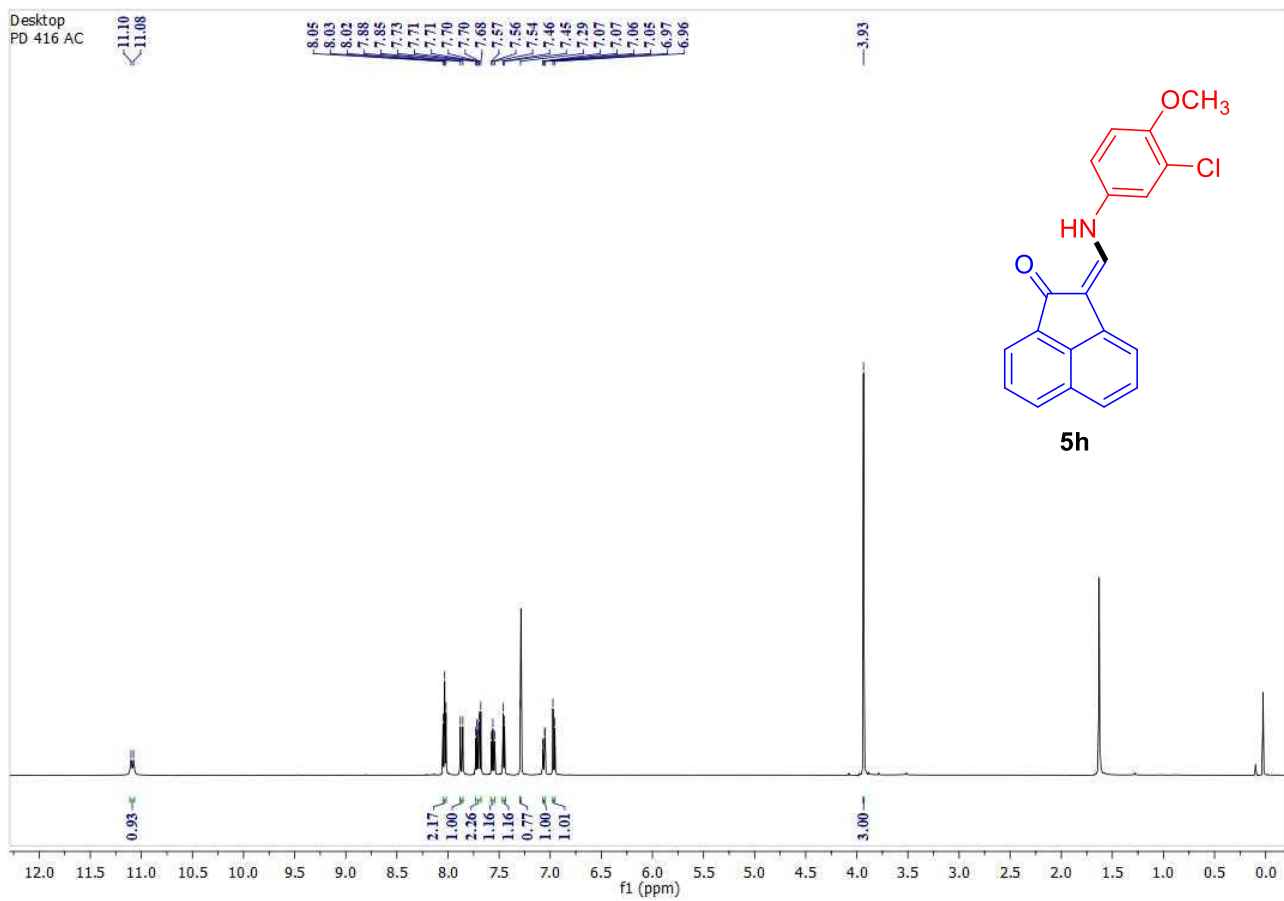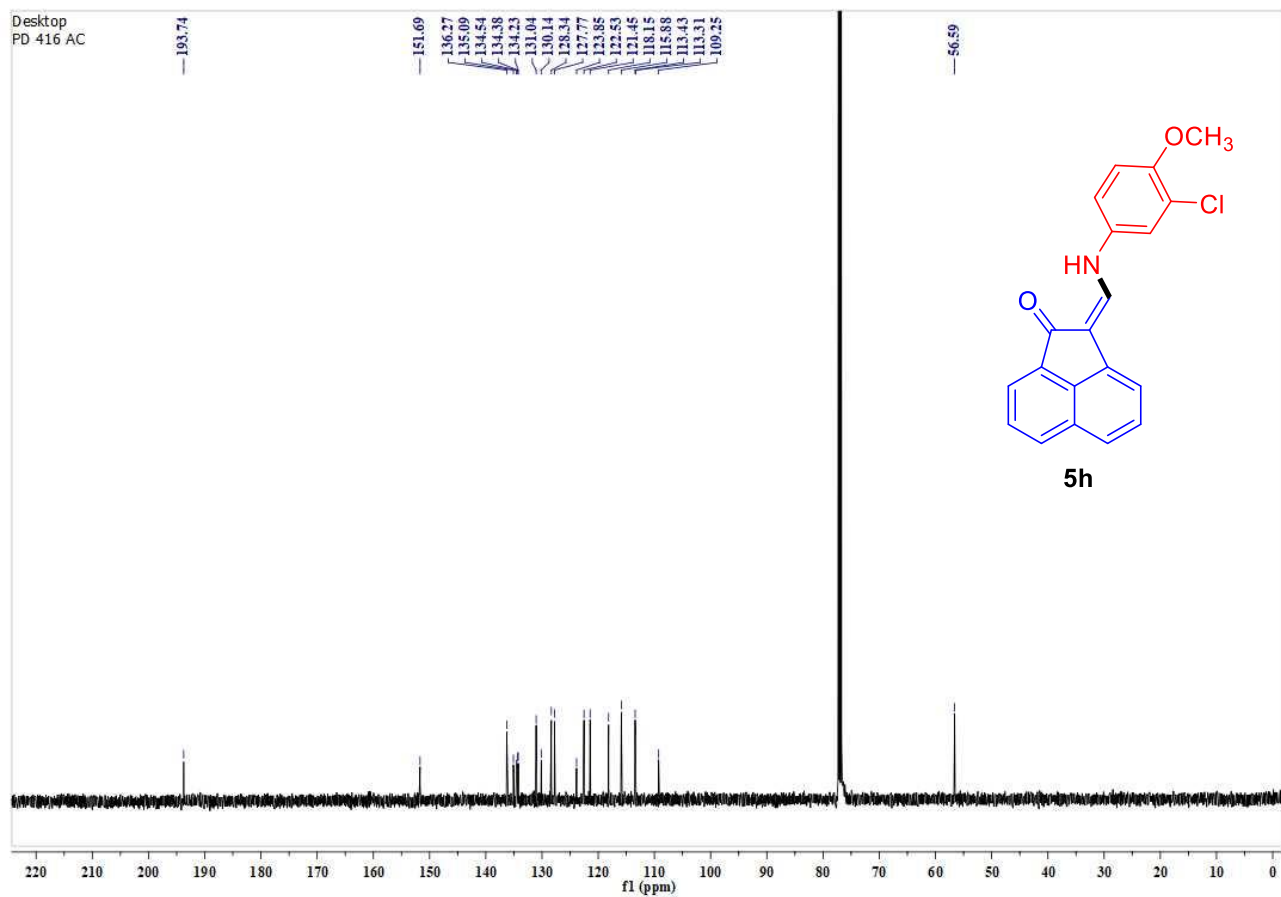

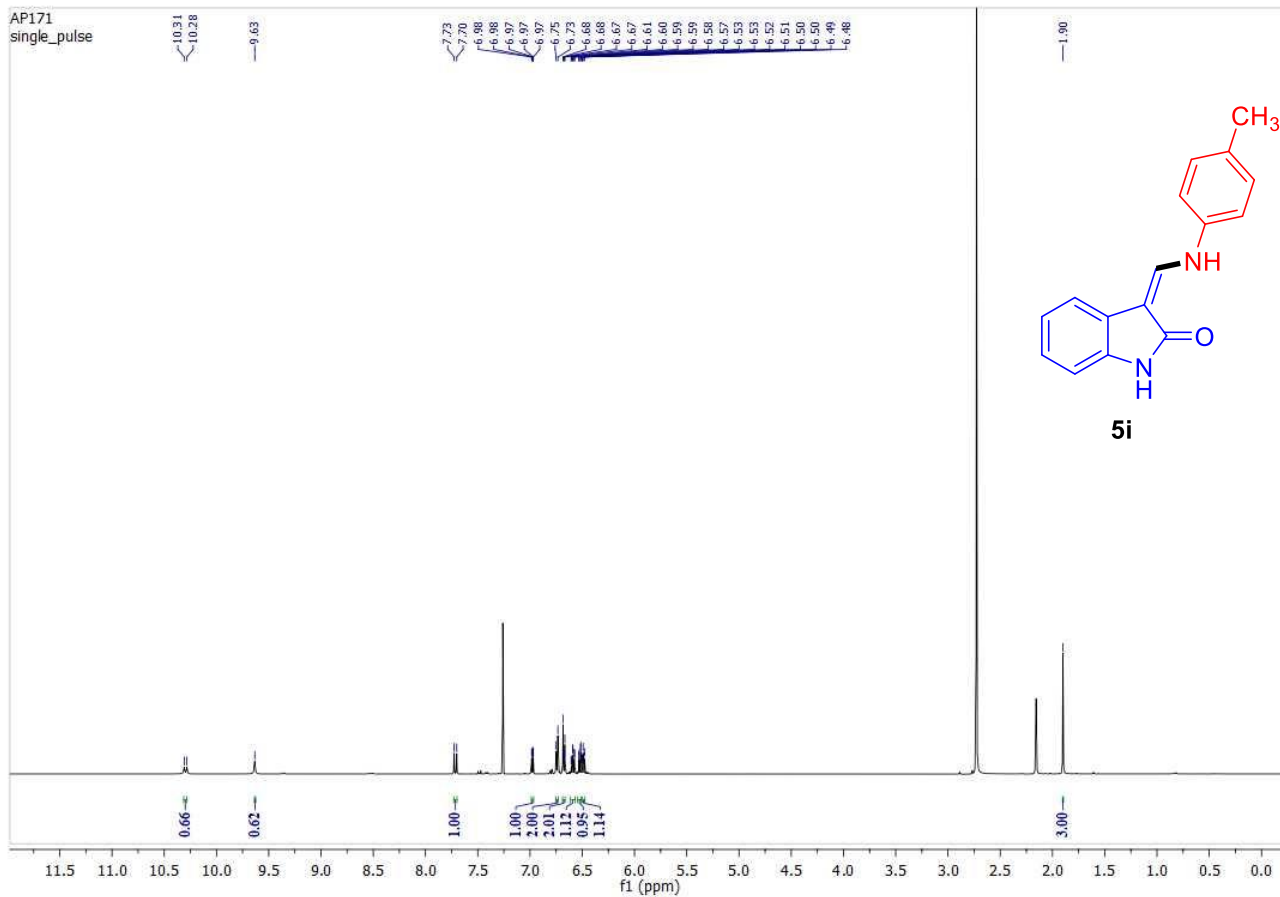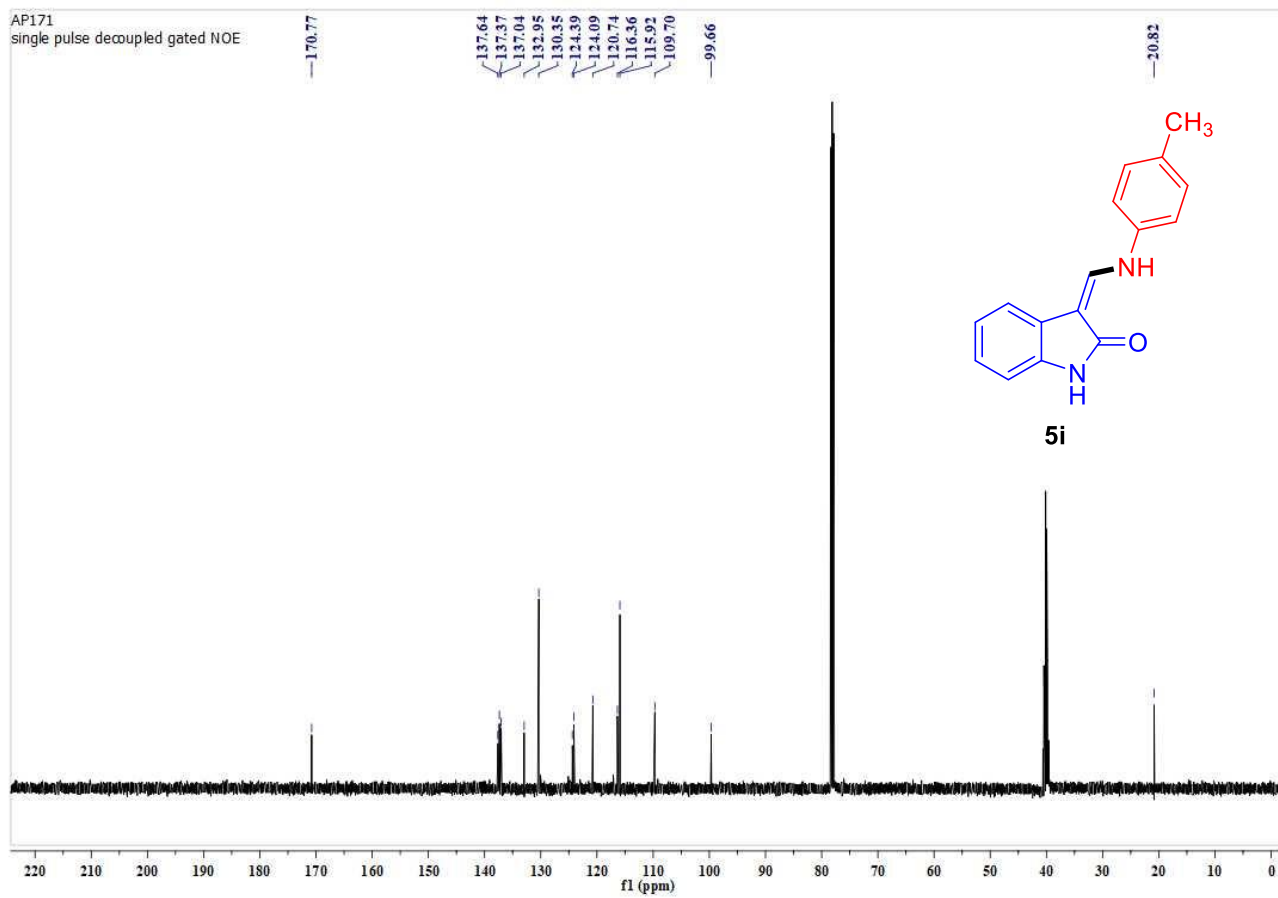



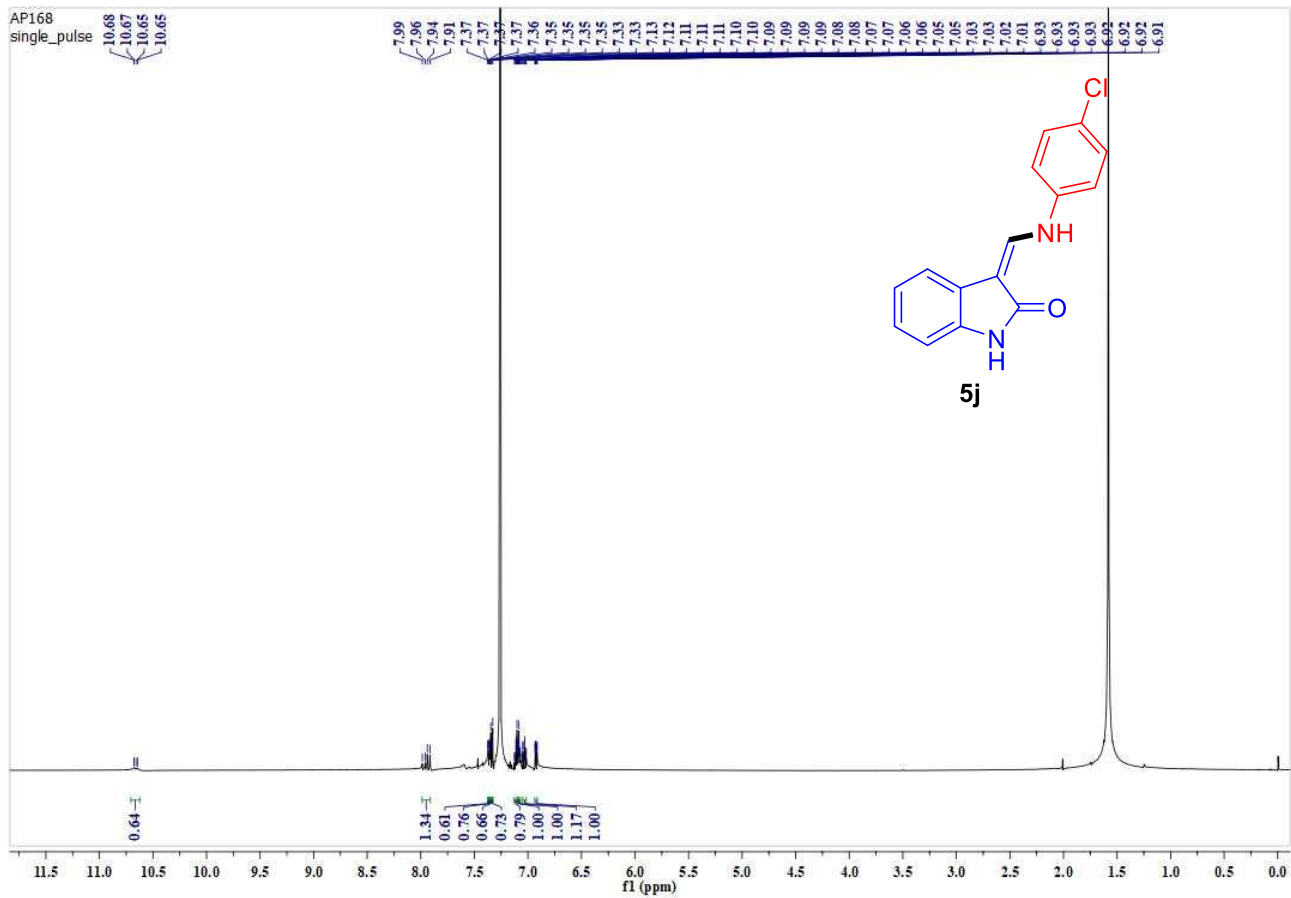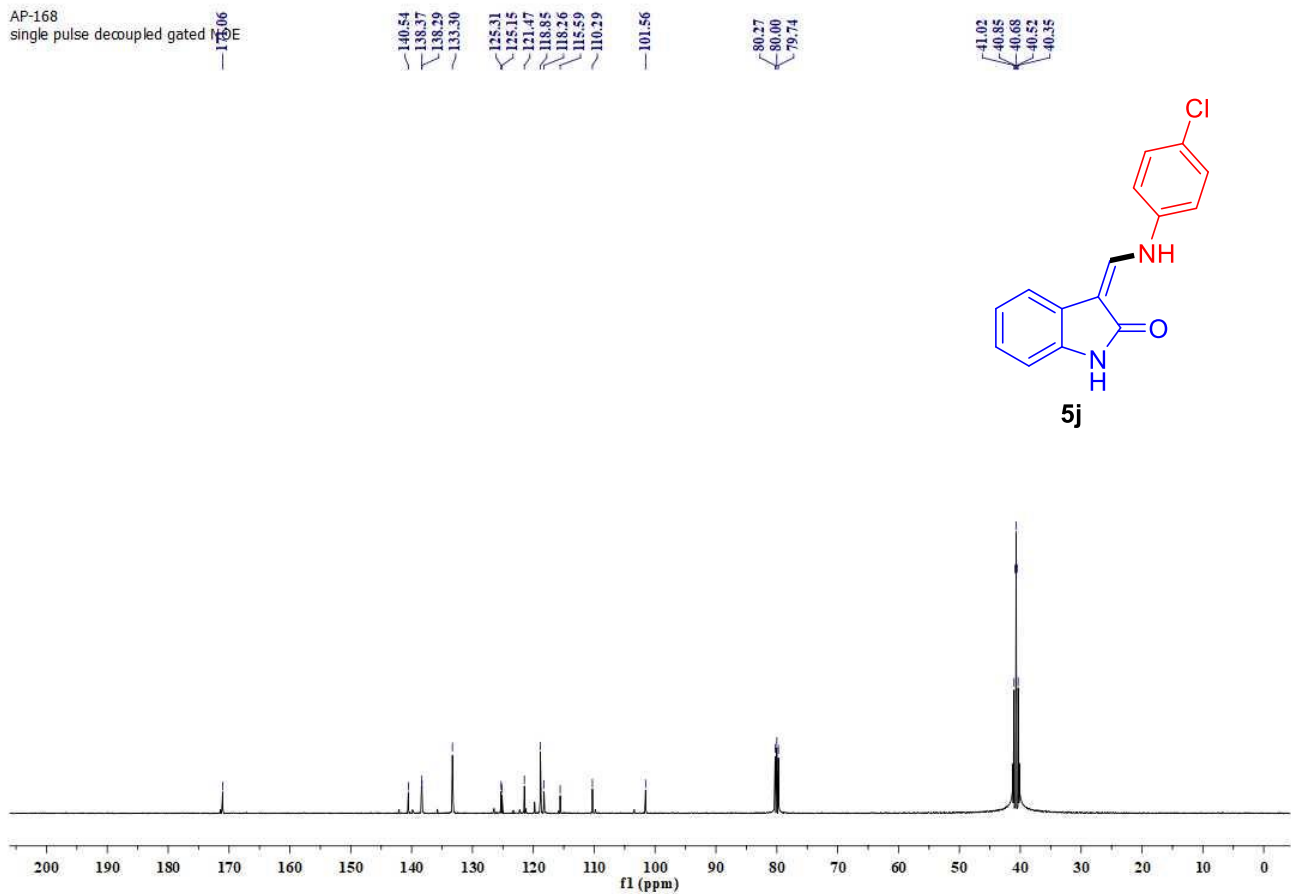

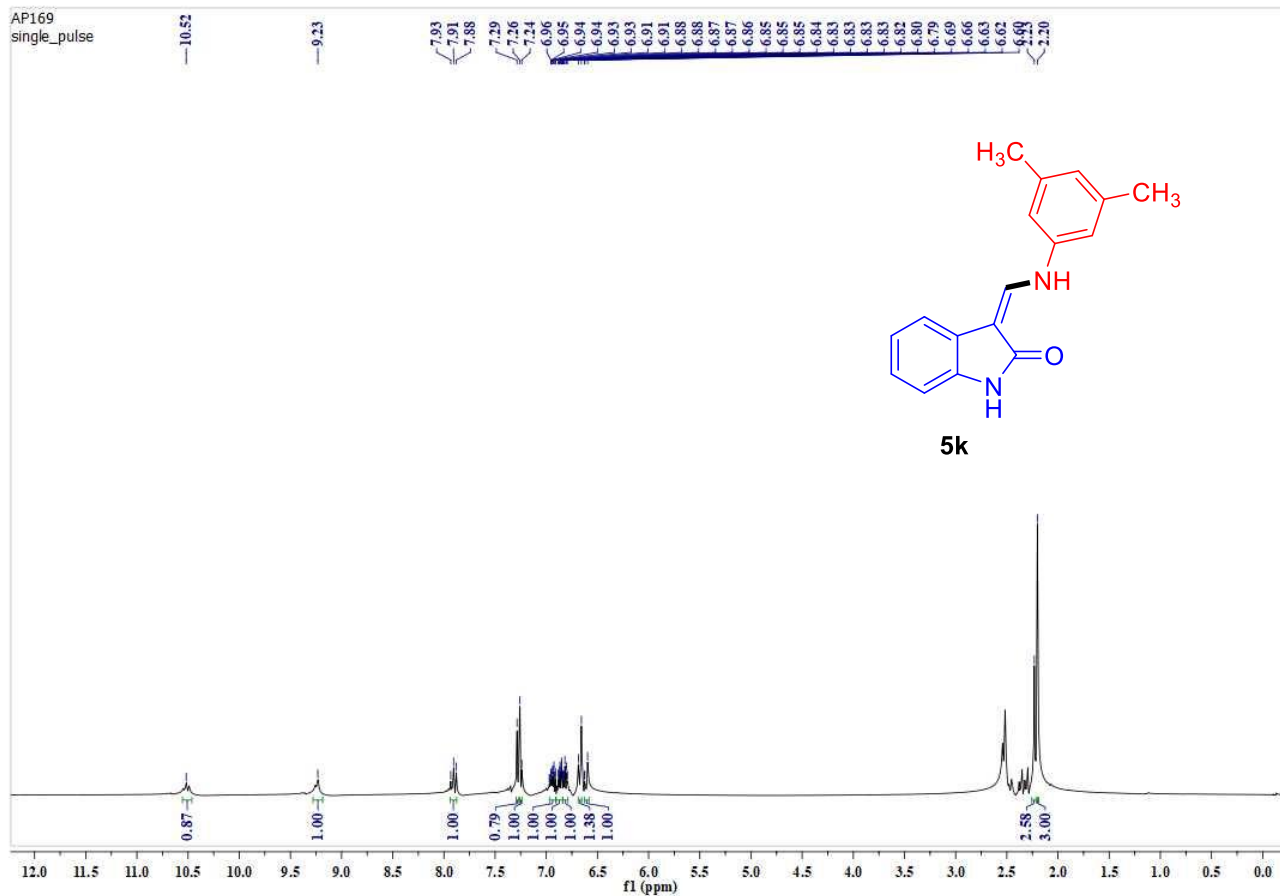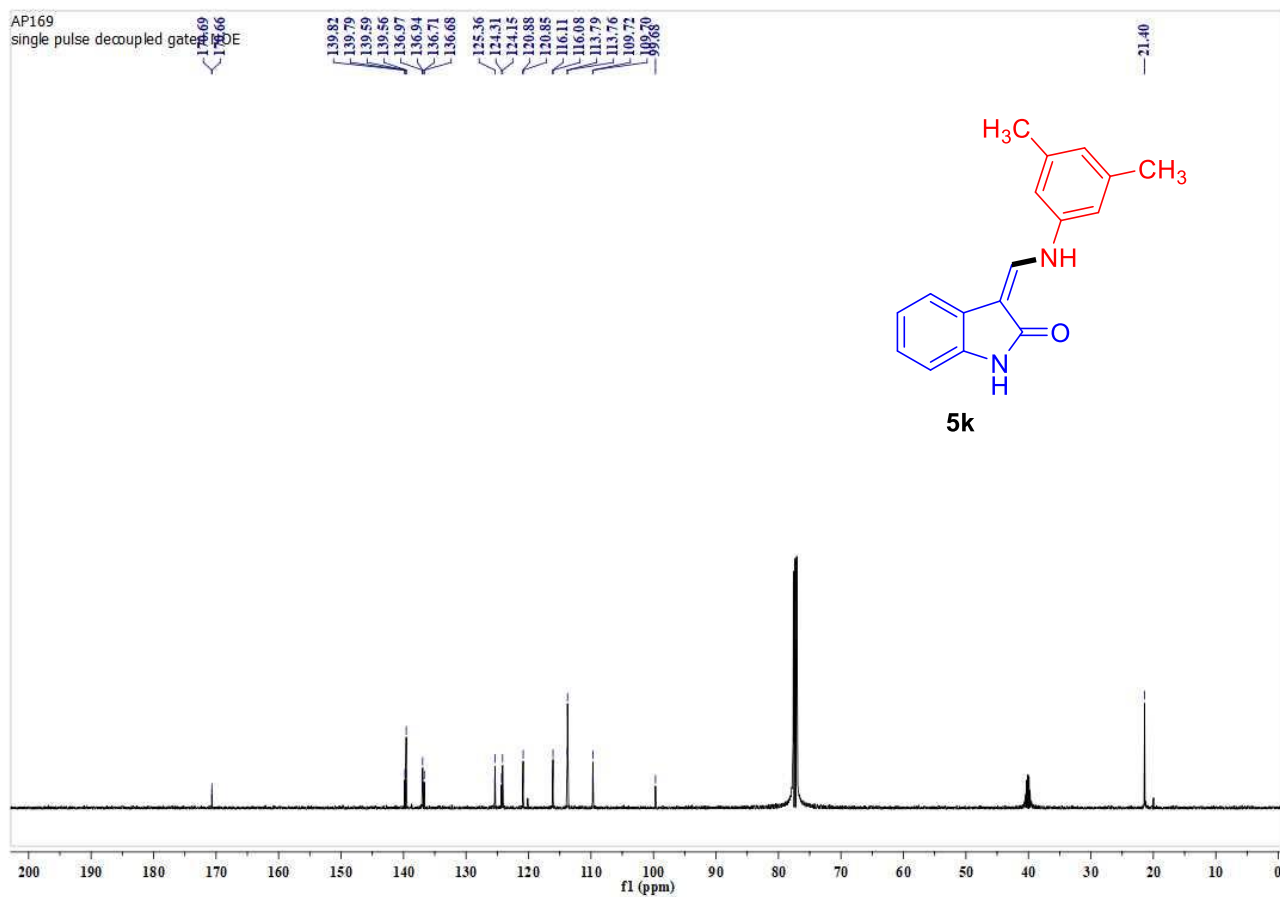

AP-170  
single\_pulse

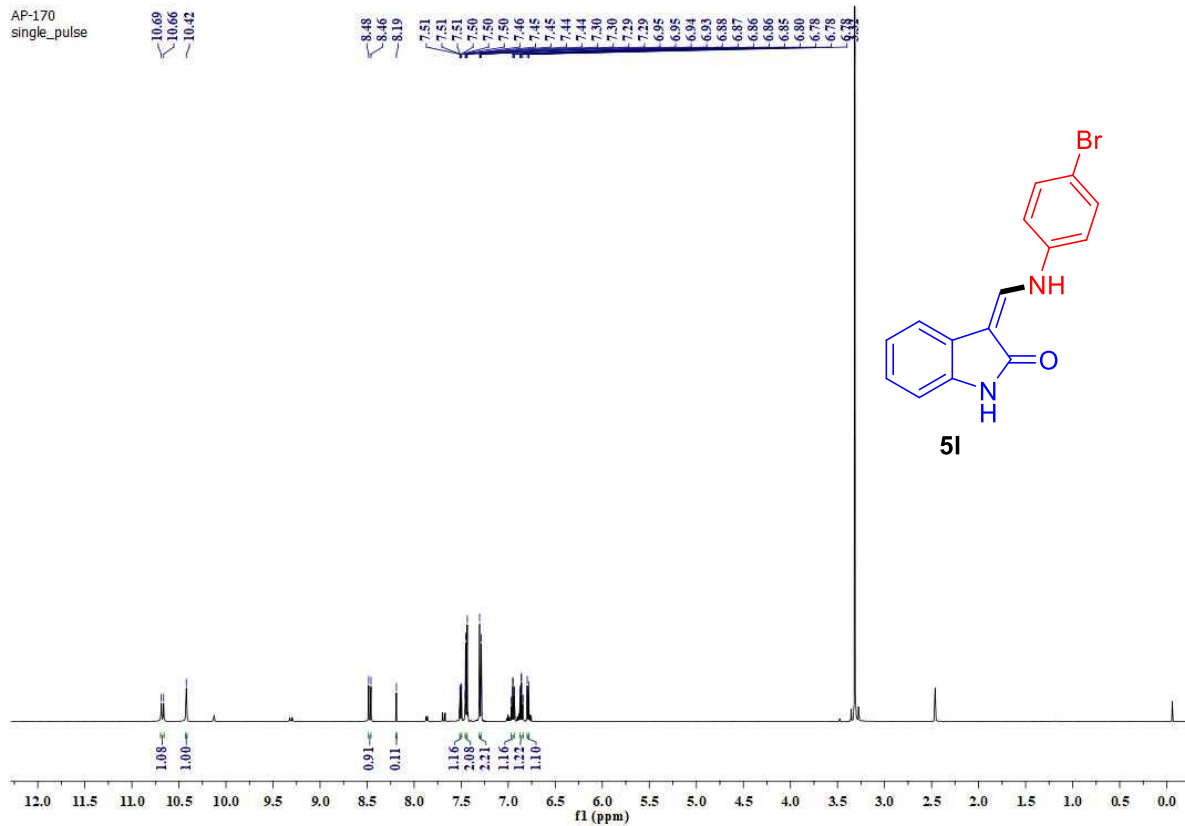

AP-170  
single pulse decoupled gated NOE

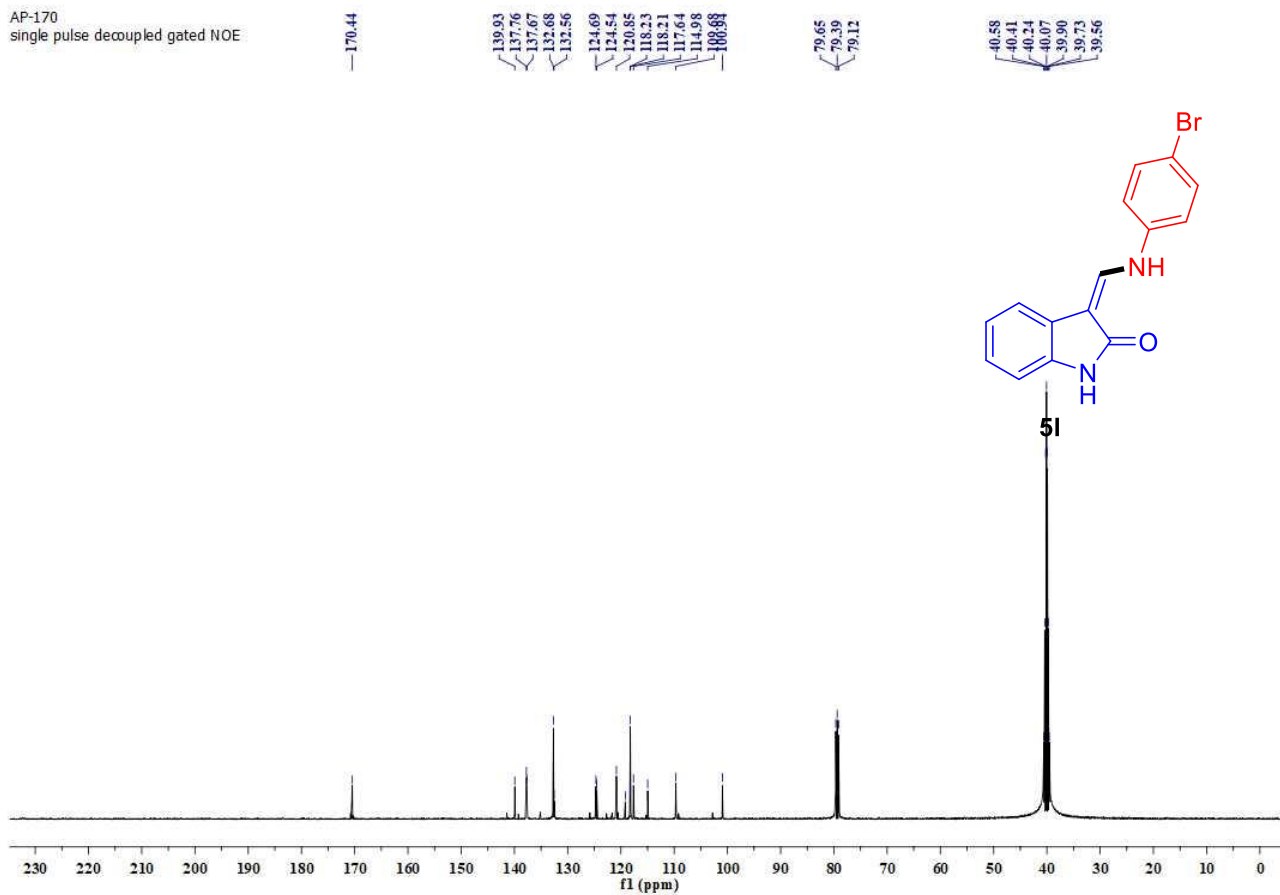

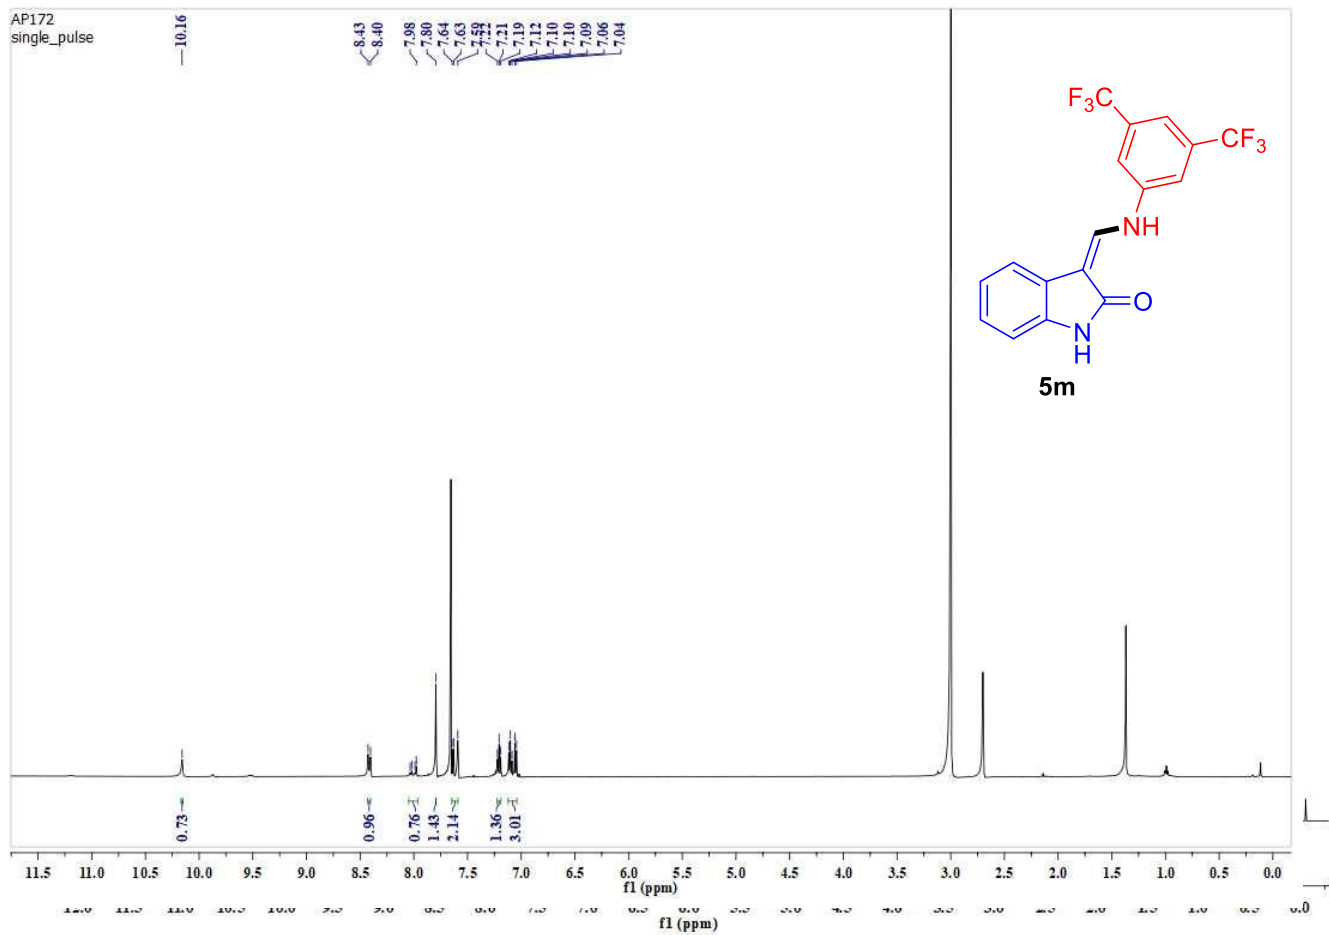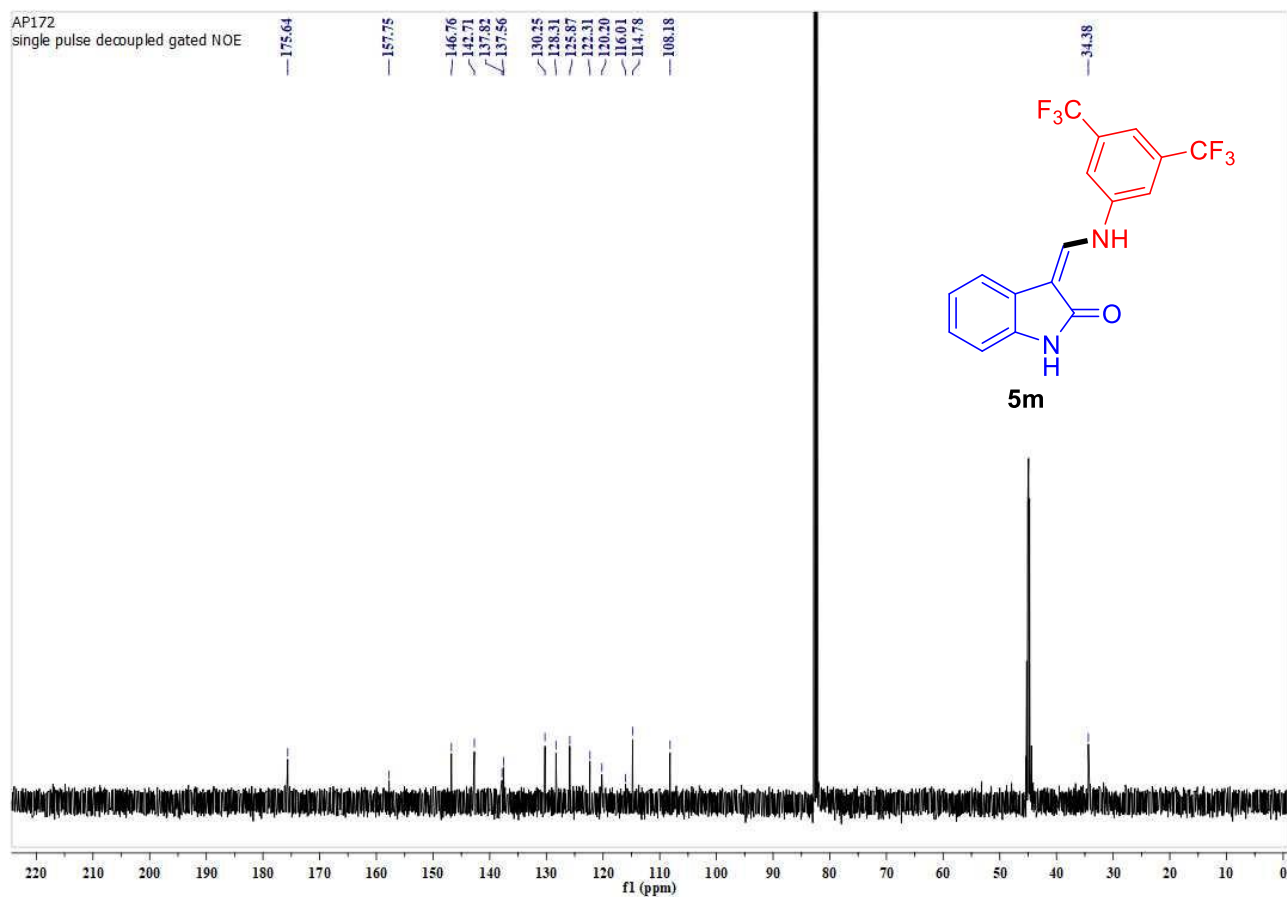

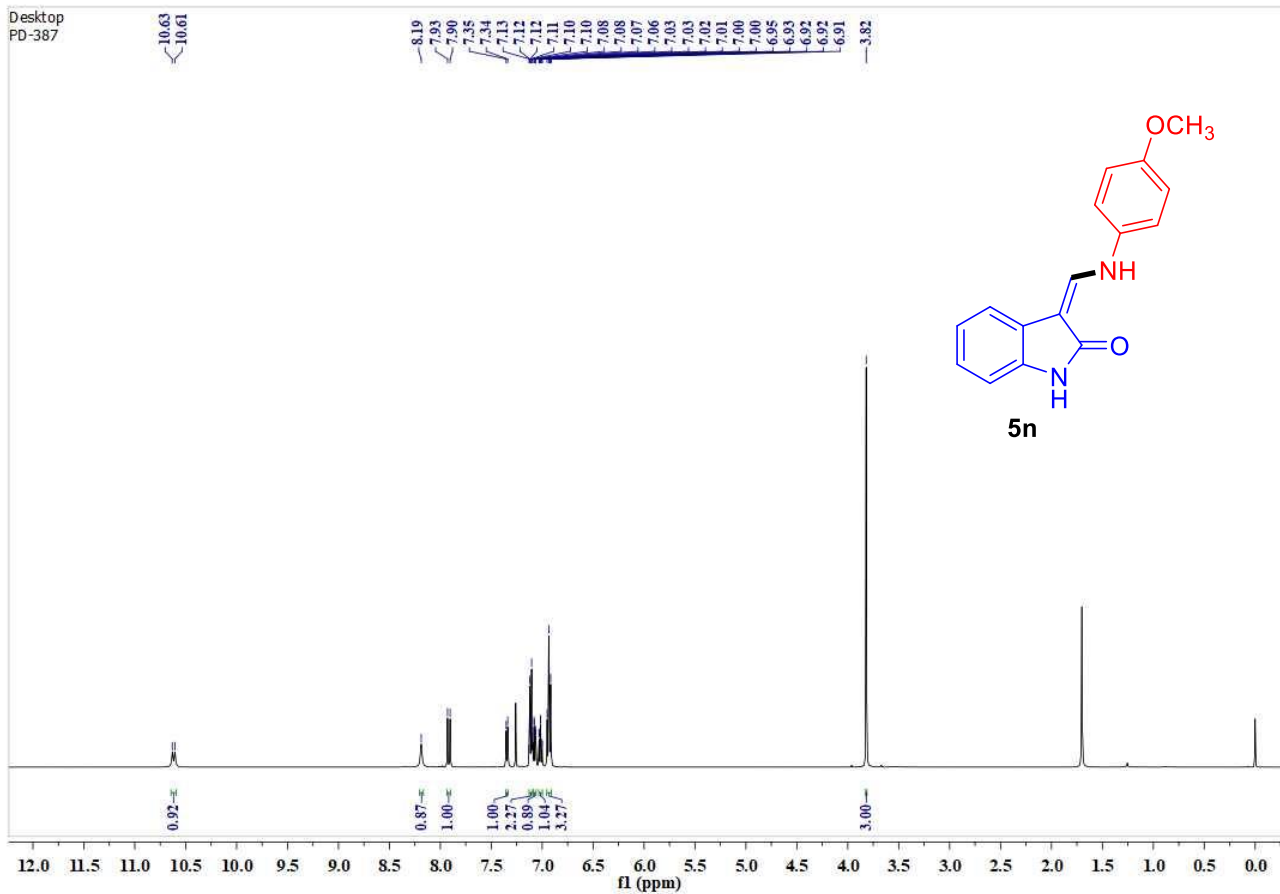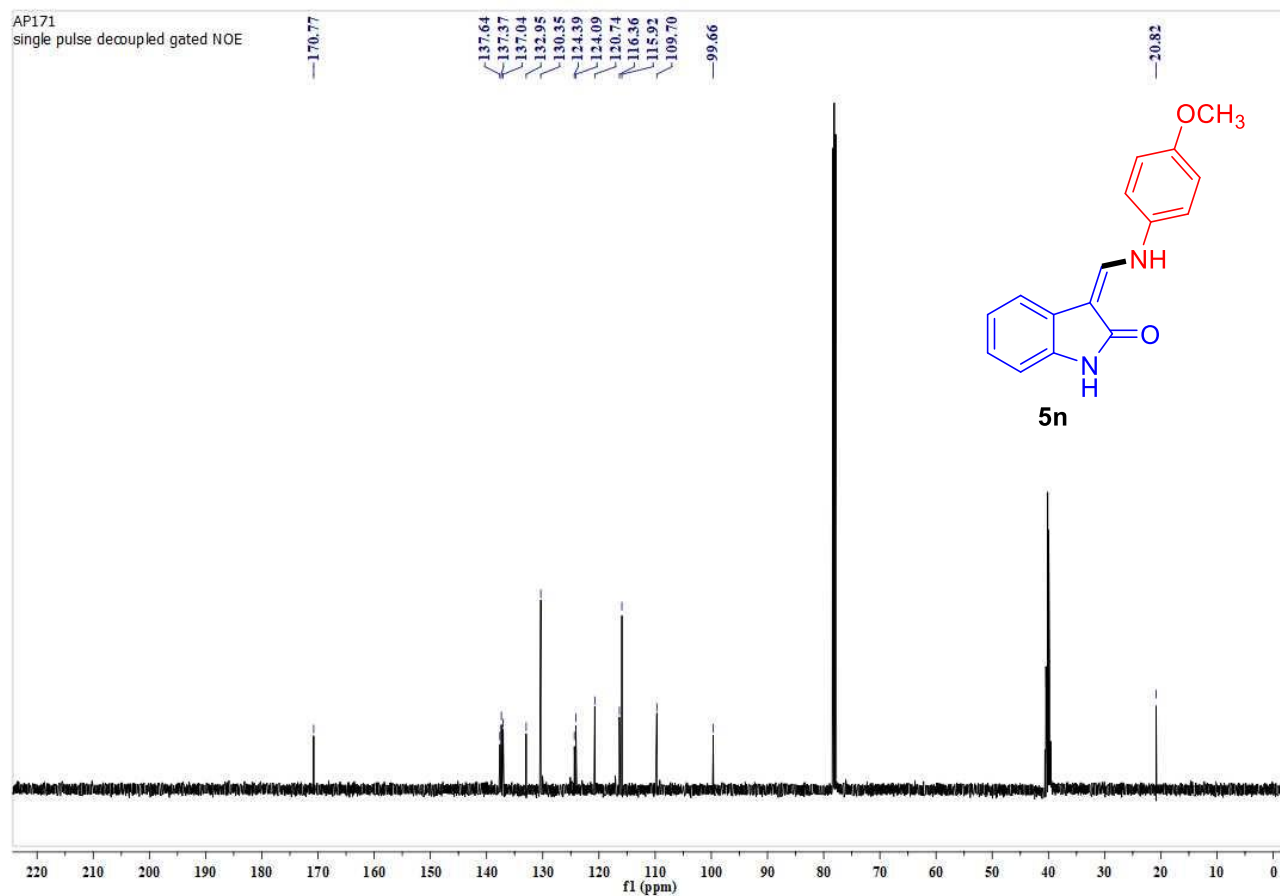

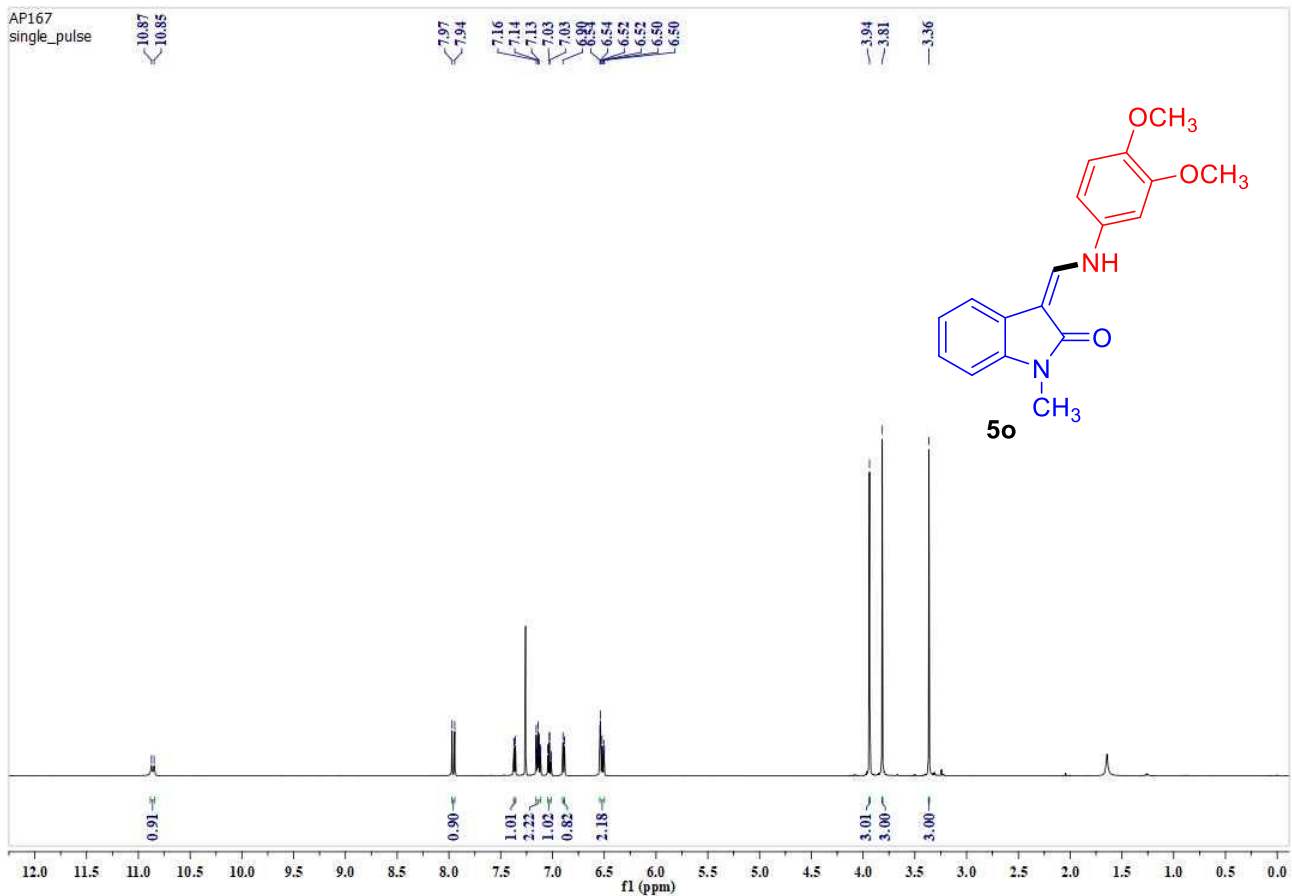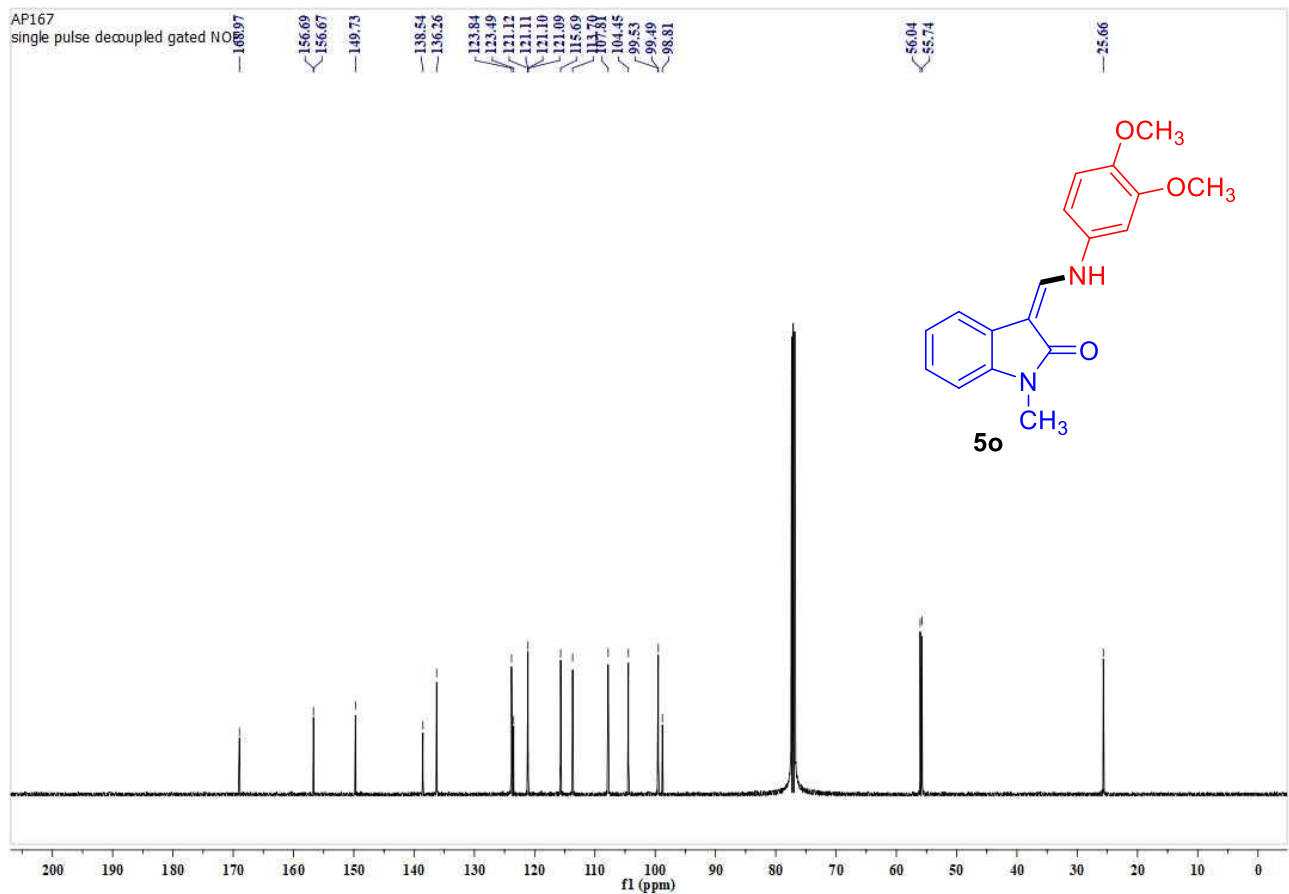

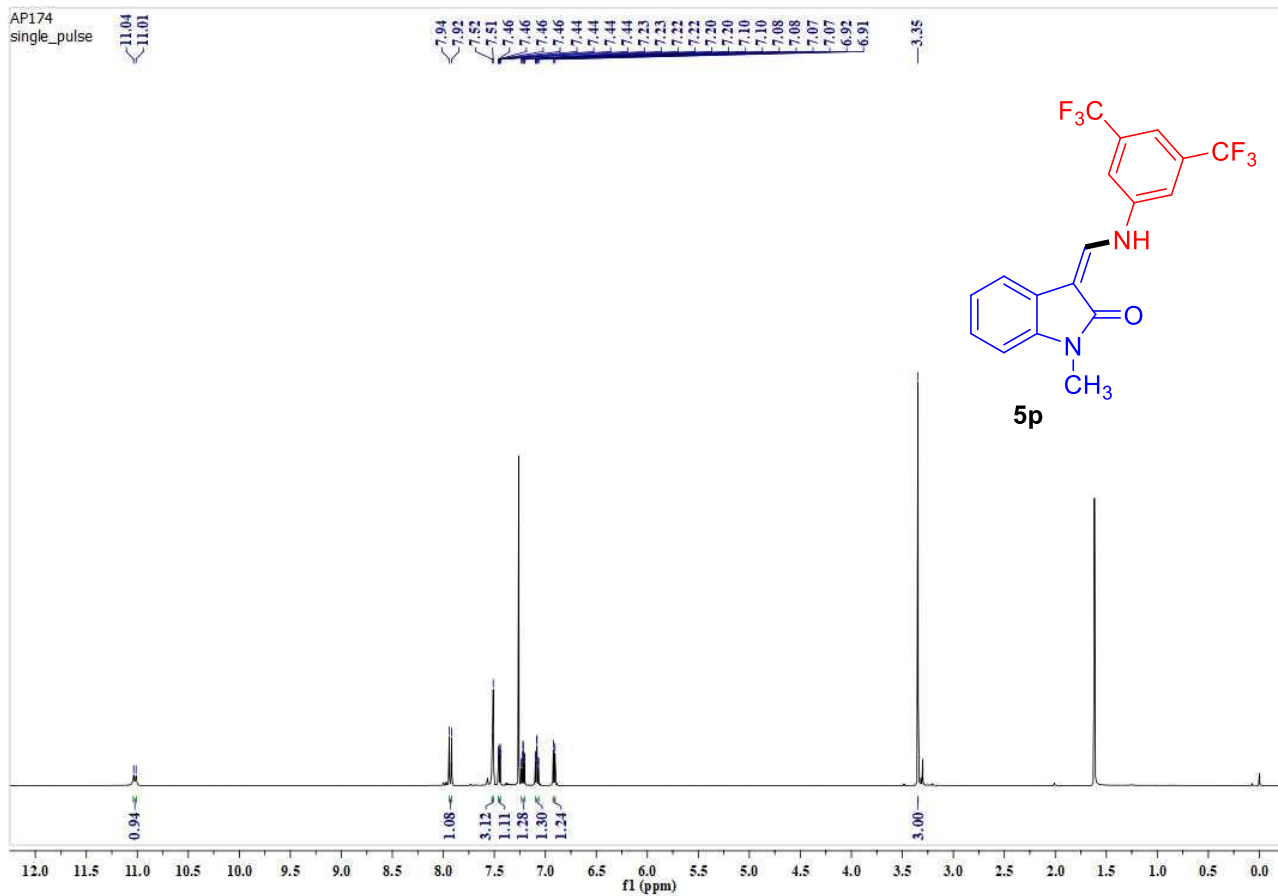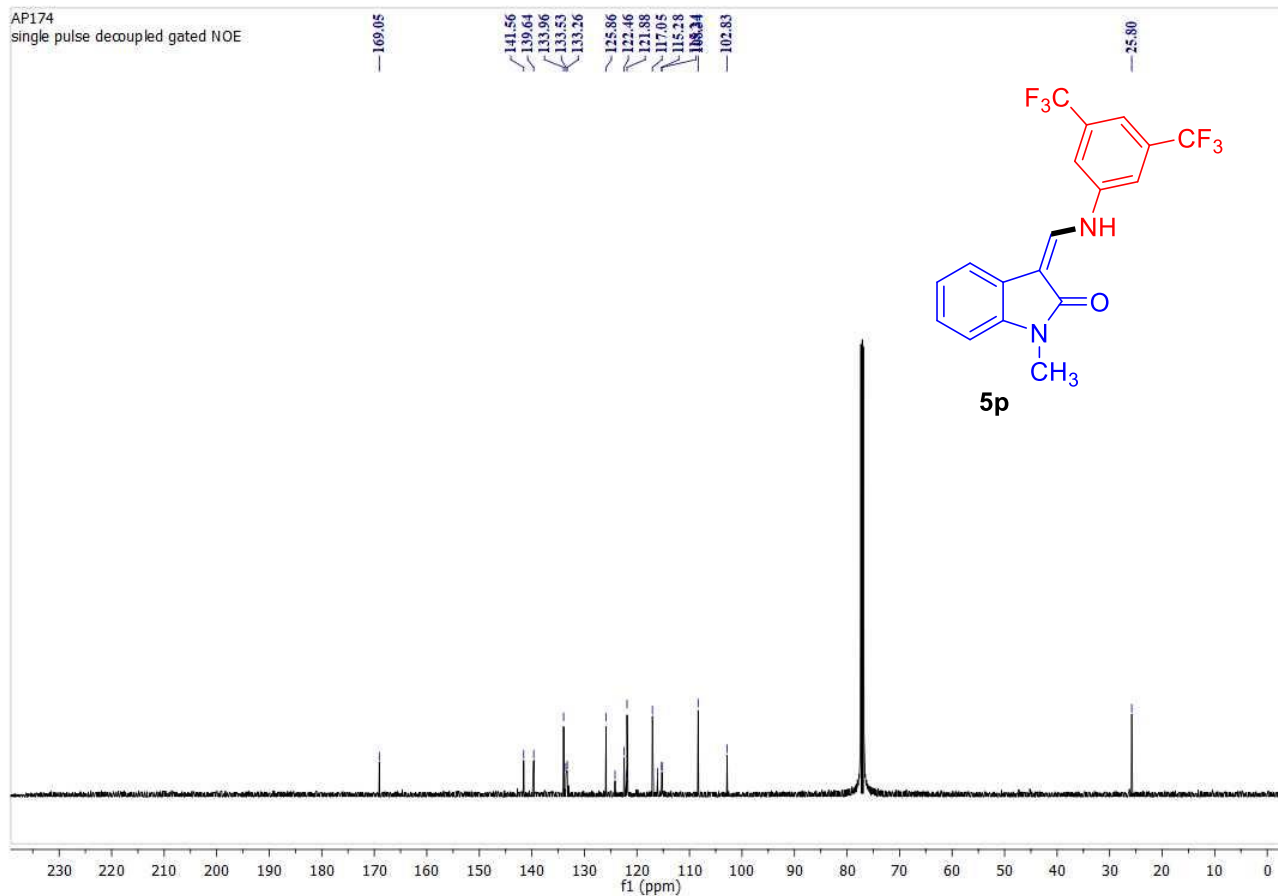





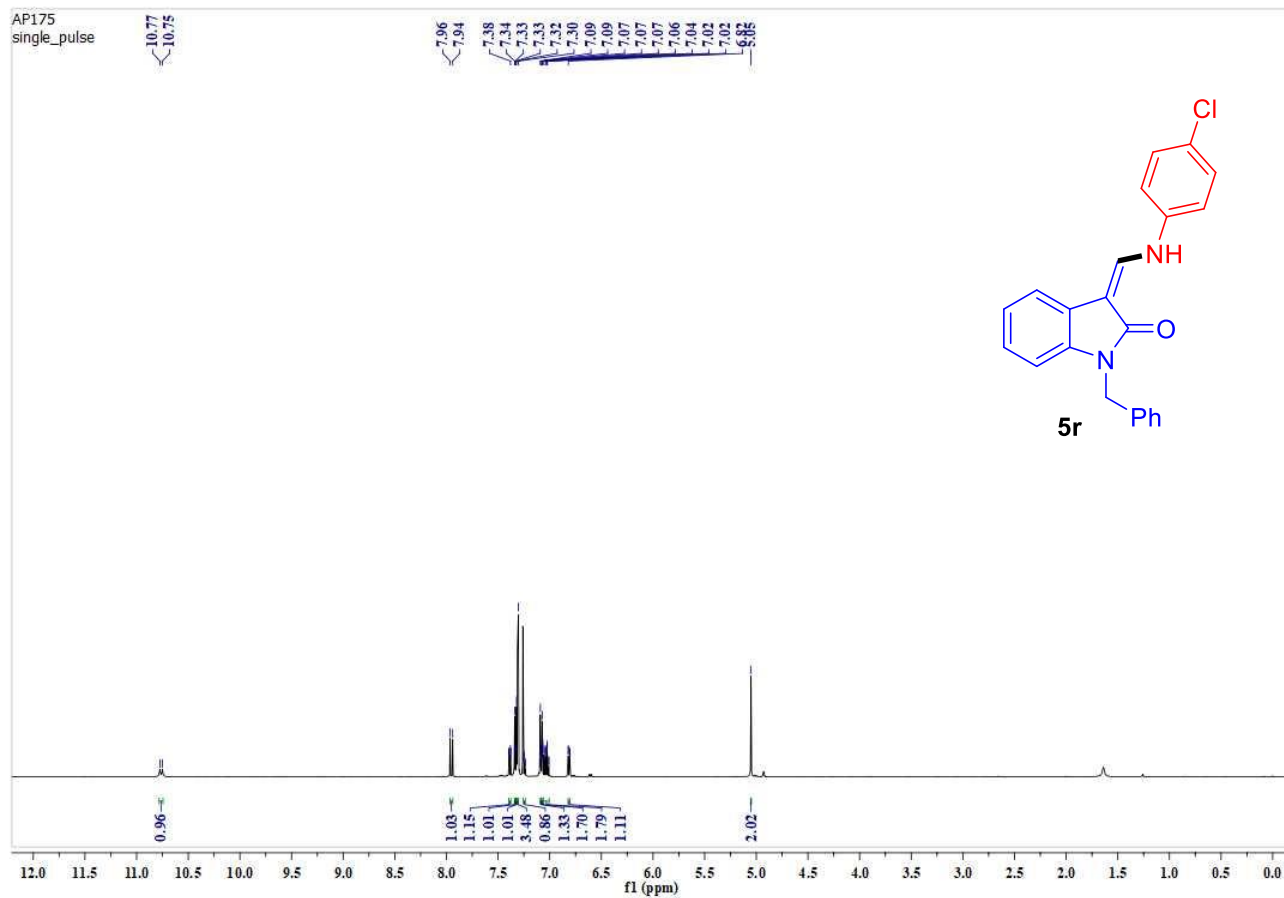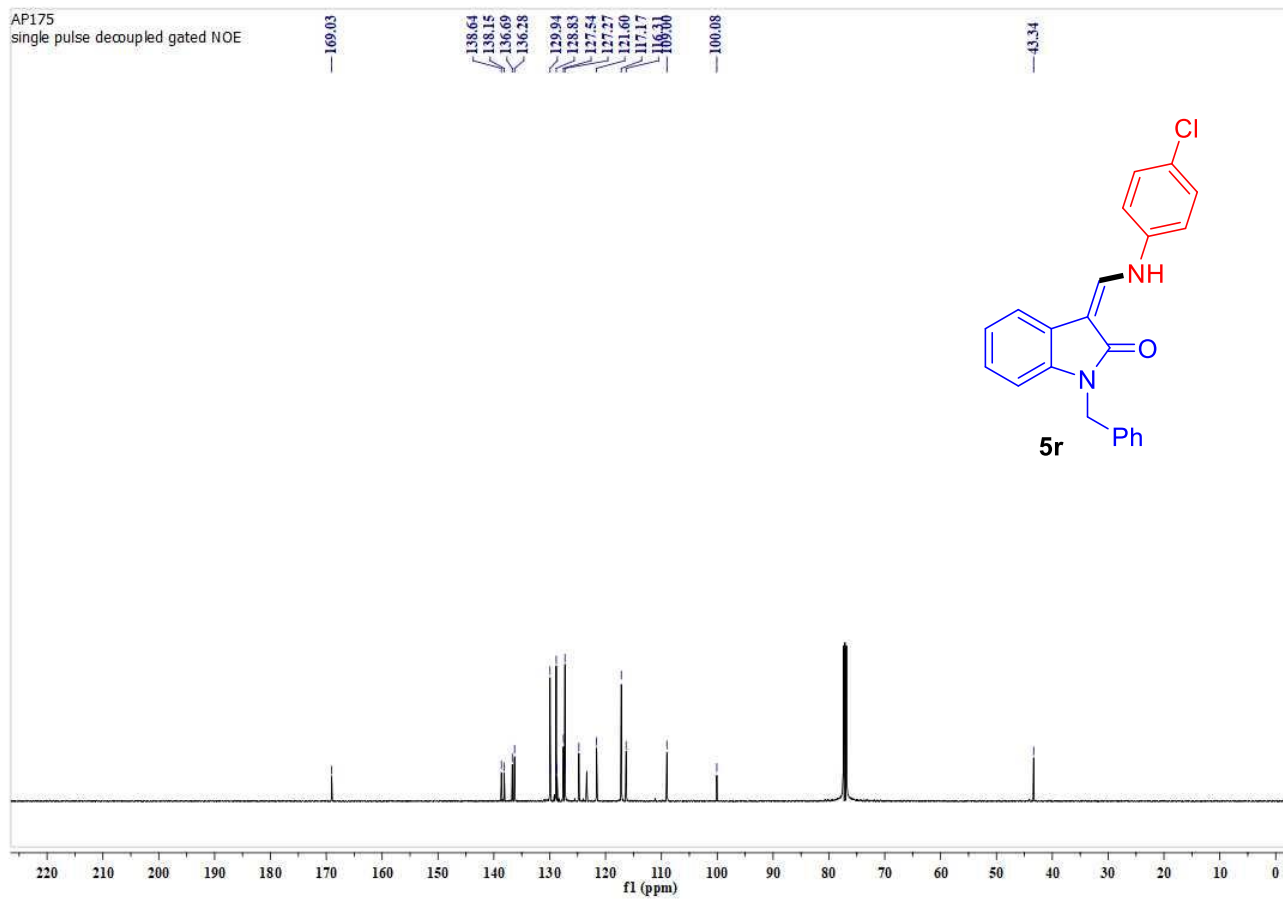

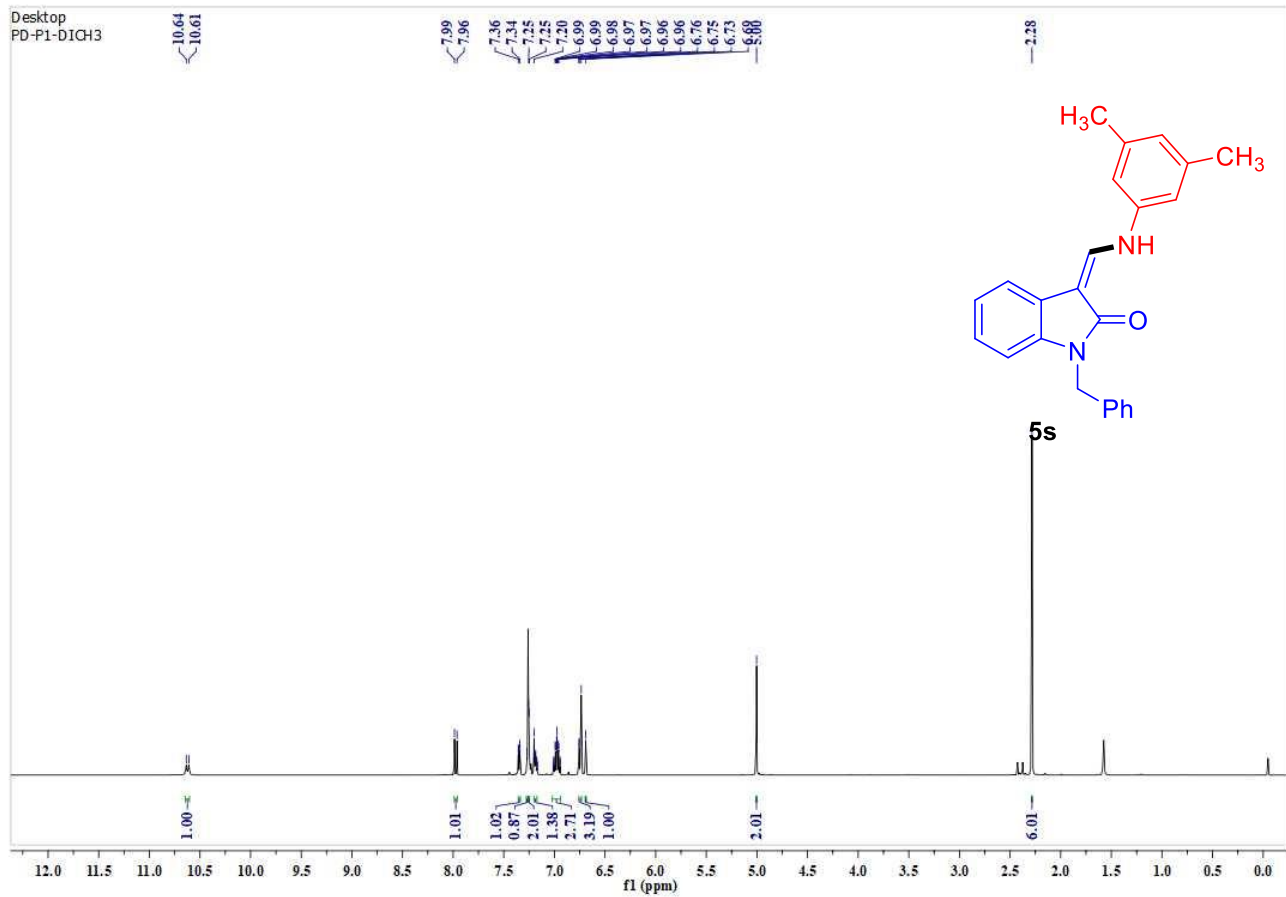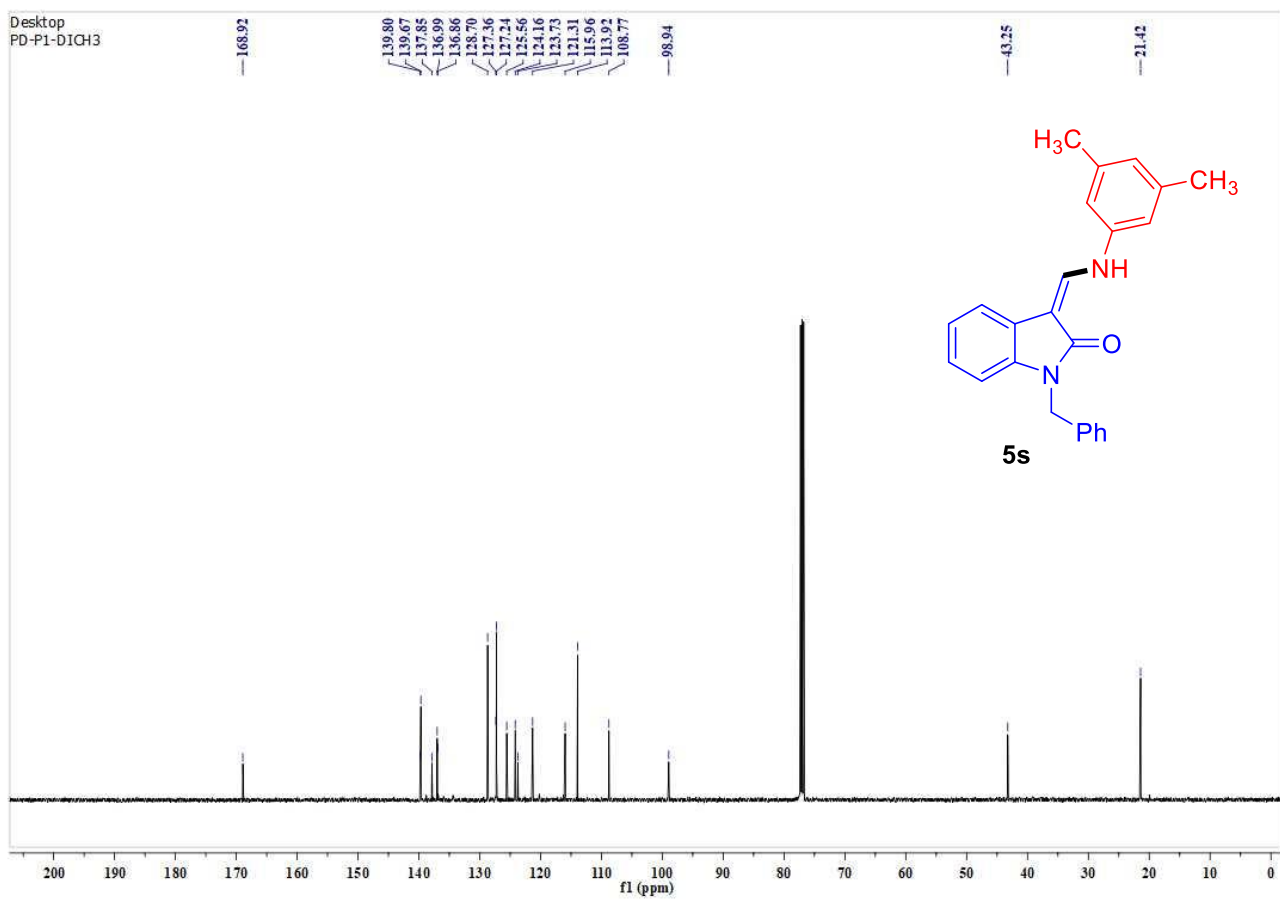

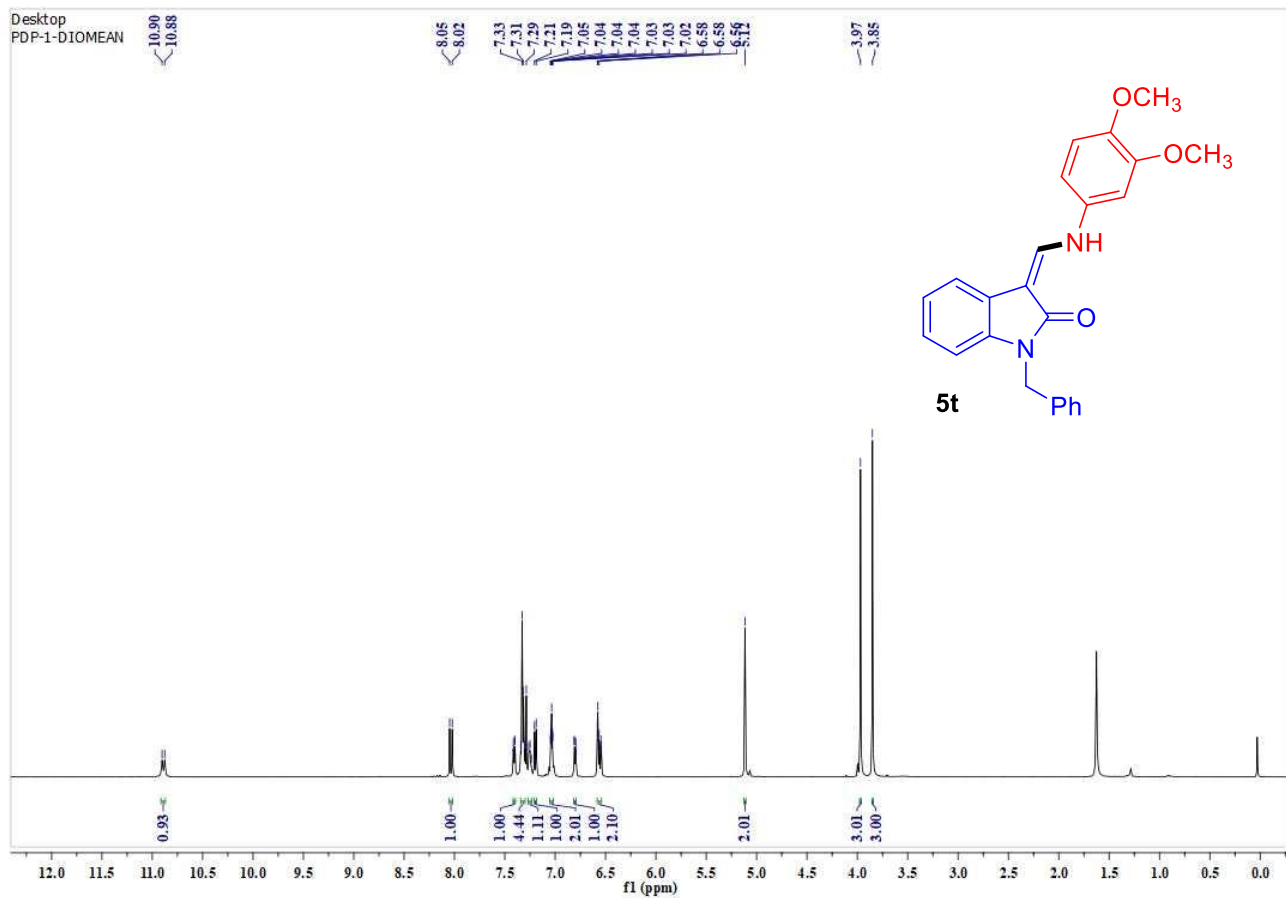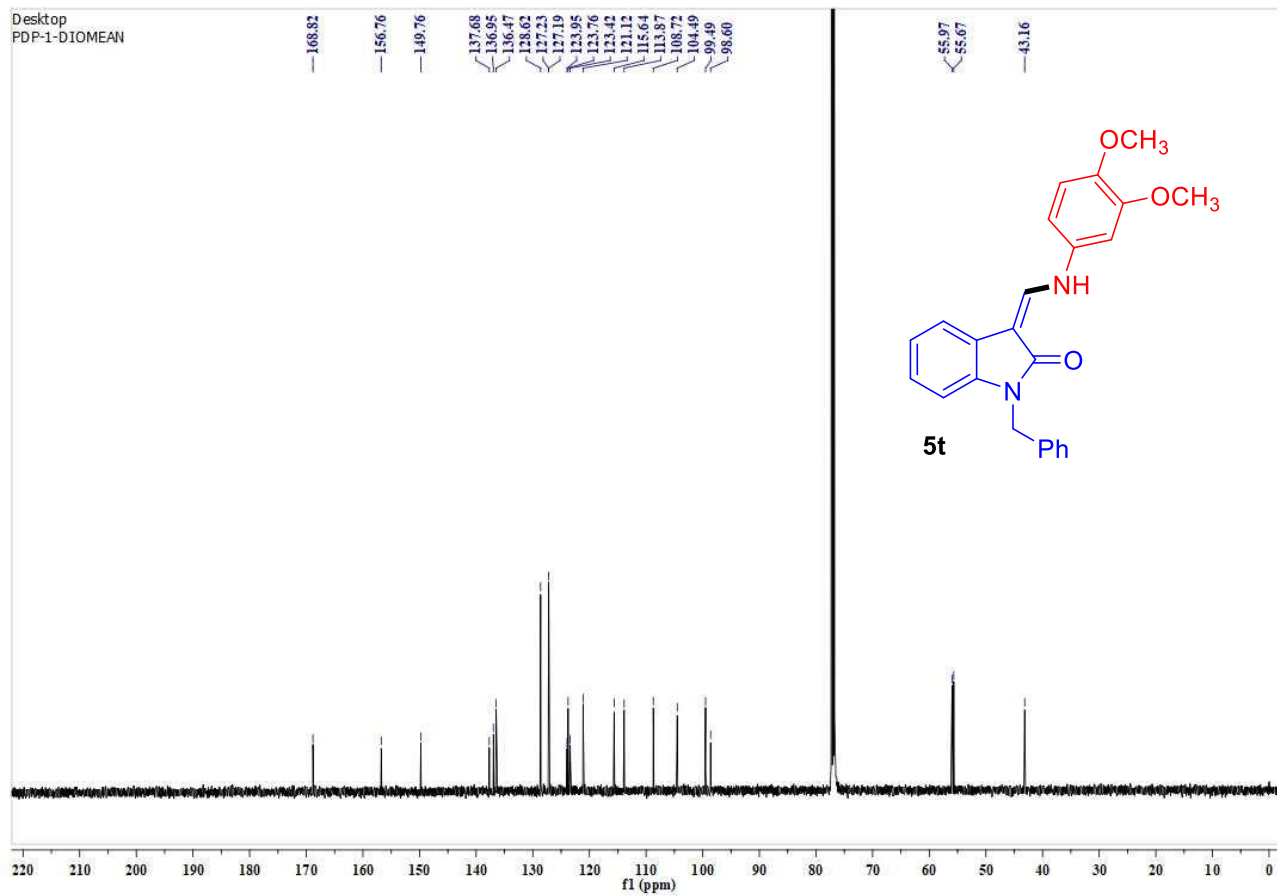

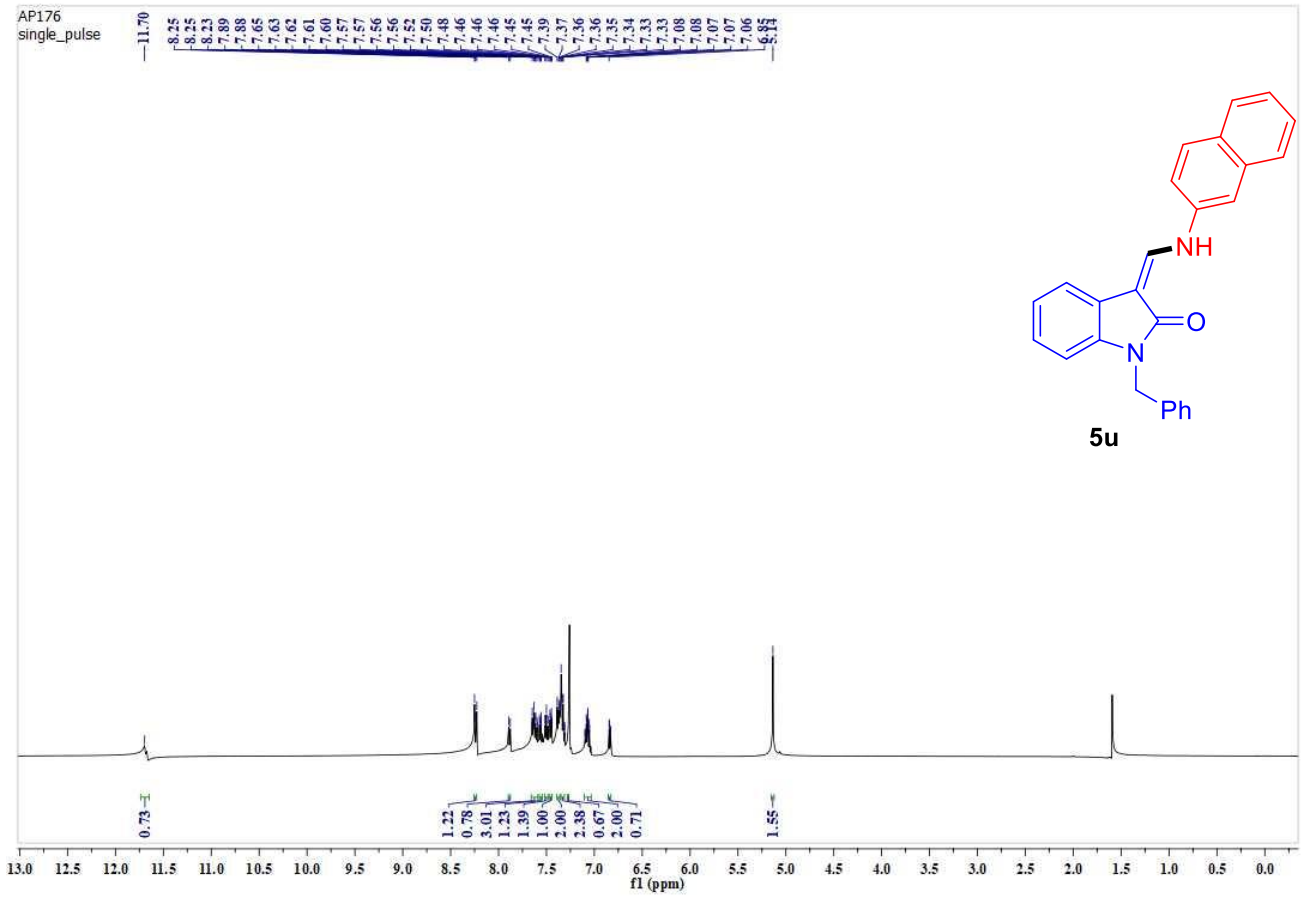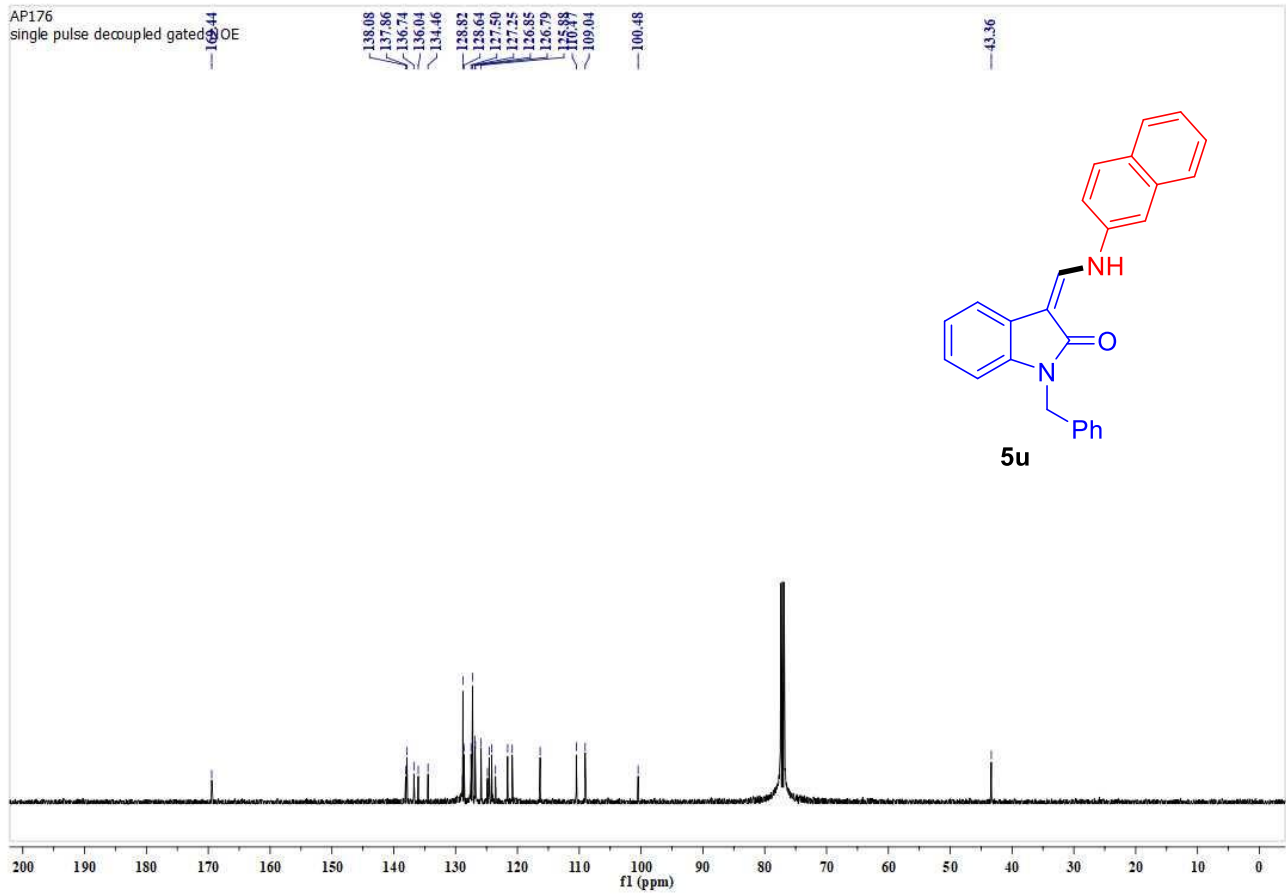

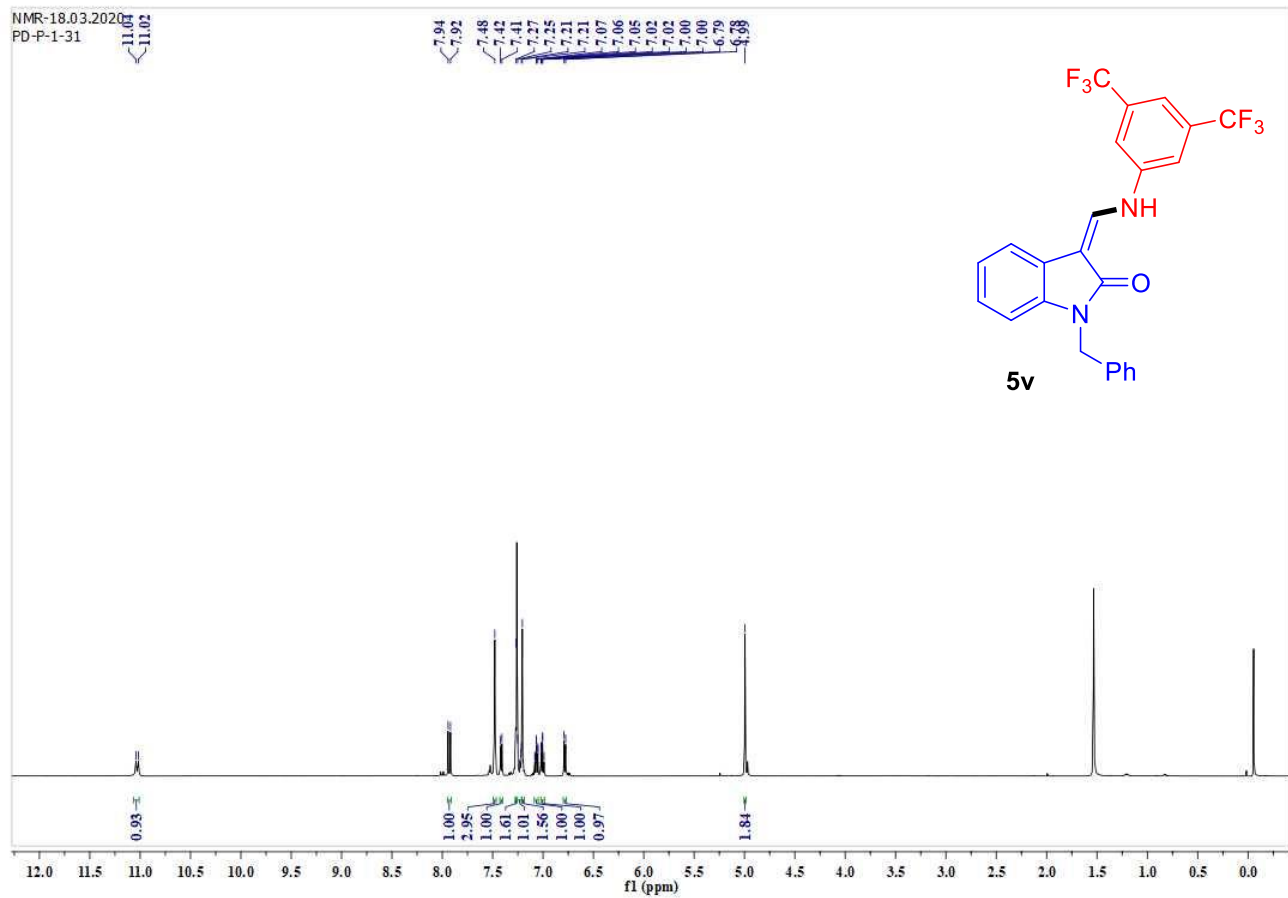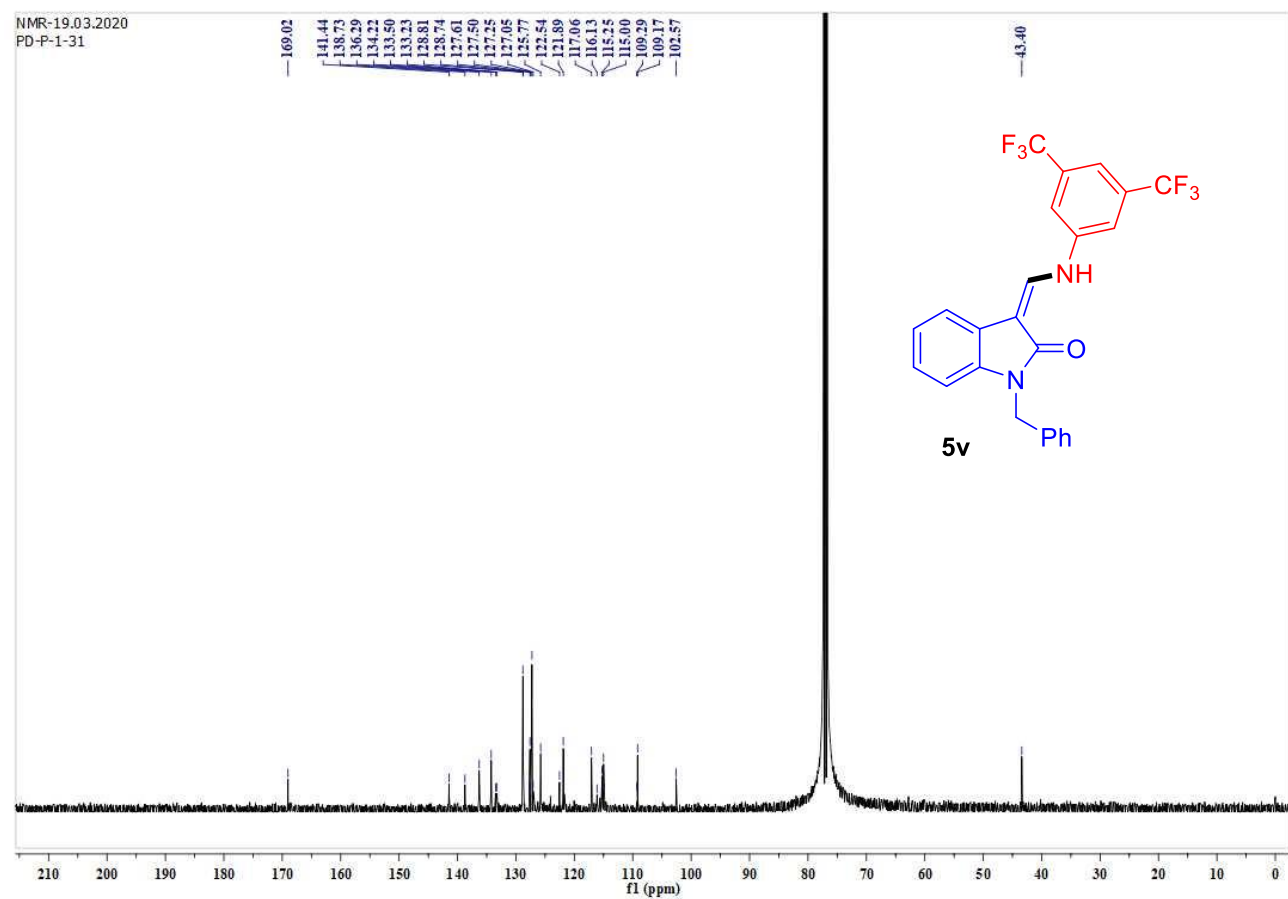

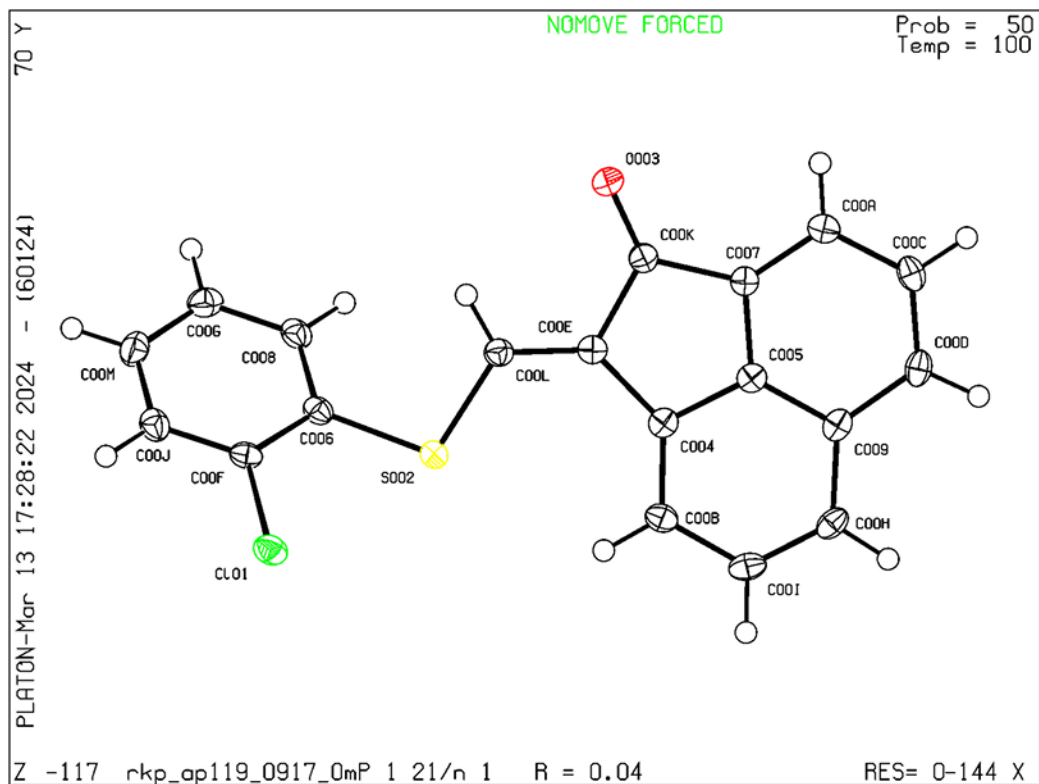

|                    |                                      |
|--------------------|--------------------------------------|
| Formula            | C <sub>19</sub> H <sub>11</sub> ClOS |
| Formula Wt.        | 322.79                               |
| Crystal color      | yellow                               |
| Crystal system     | Needle shape                         |
| Space group        | P 1 21/n 1                           |
| a(Å)               | 3.8430(2)                            |
| b(Å)               | 14.0193(7)                           |
| c(Å)               | 26.2392(12)                          |
| α(deg)             | 90                                   |
| β(deg)             | 92.820(1)                            |
| c(deg)             | 90                                   |
| V(Å <sup>3</sup> ) | 1411.96(12)                          |

**Figure S1:** ORTEP plot of the crystal structure of **3d**.

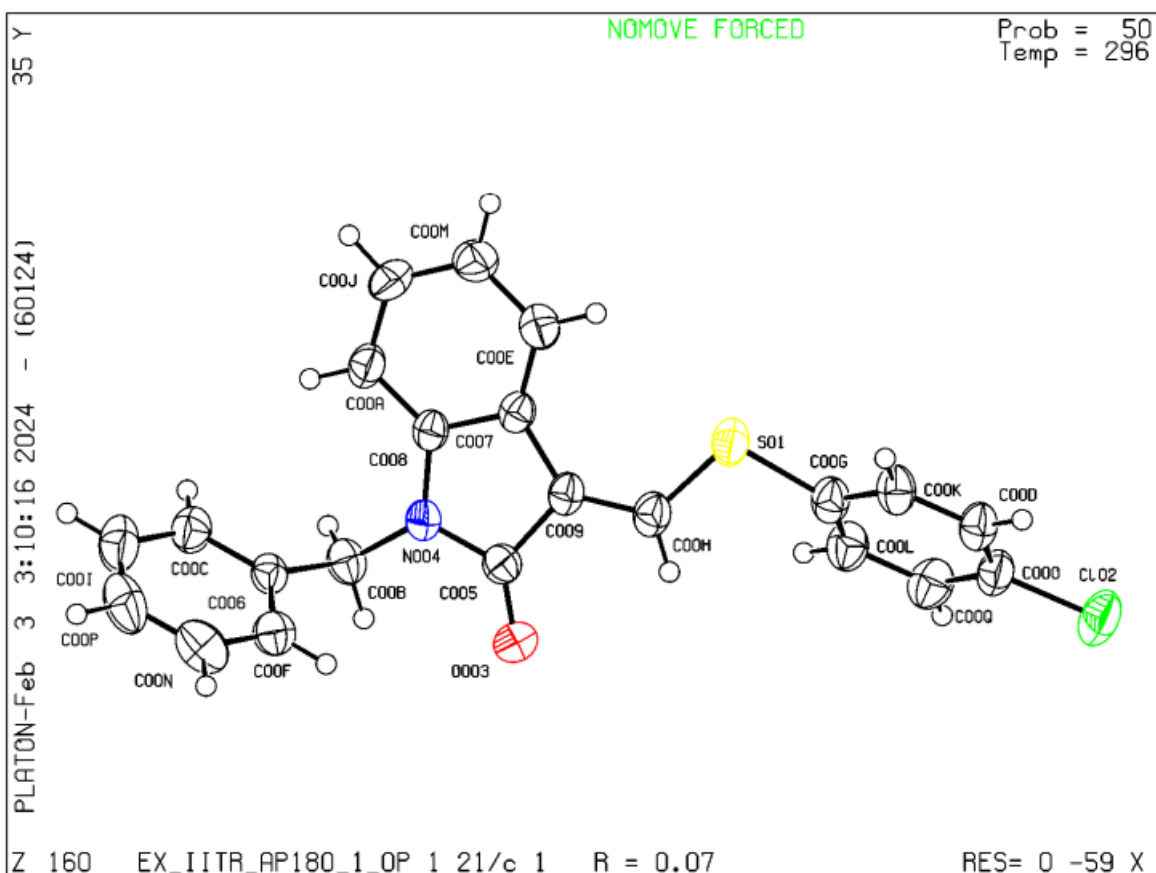

|                    |                                       |
|--------------------|---------------------------------------|
| Formula            | C <sub>22</sub> H <sub>16</sub> CINOS |
| Formula Wt.        | 377.90                                |
| Crystal color      | yellow                                |
| Crystal system     | Needle shape                          |
| Space group        | P21/c                                 |
| a(Å)               | 20.066(4)                             |
| b(Å)               | 5.963(2)                              |
| c(Å)               | 16.542(3)                             |
| α(deg)             | 90.25(3)                              |
| β(deg)             | 112.50(3)                             |
| c(deg)             | 90.04(3)                              |
| V(Å <sup>3</sup> ) | 1828.6(9)                             |

**Figure S2:** ORTEP plot of the crystal structure of **3j**.

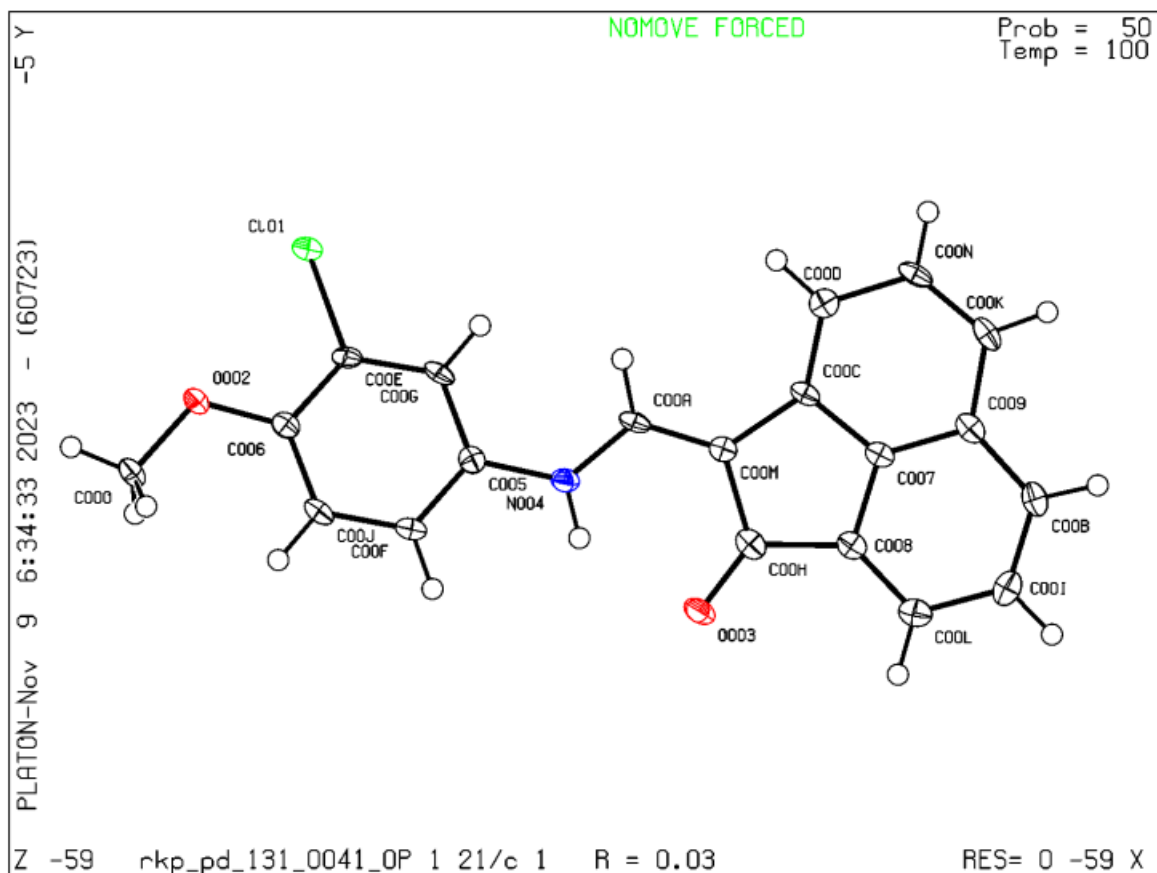

|                    |                                                   |
|--------------------|---------------------------------------------------|
| Formula            | C <sub>20</sub> H <sub>14</sub> ClNO <sub>2</sub> |
| Formula Wt.        | 335.77                                            |
| Crystal color      | yellow                                            |
| Crystal system     | Needle shape                                      |
| Space group        | P21/c                                             |
| a(Å)               | 14.6971 (12)                                      |
| b(Å)               | 3.9784 (3)                                        |
| c(Å)               | 25.694 (2)                                        |
| α(deg)             | 90                                                |
| β(deg)             | 94.365 (2)                                        |
| γ(deg)             | 90                                                |
| V(Å <sup>3</sup> ) | 1498.0 (2)                                        |

**Figure S3:** ORTEP plot of the crystal structure of **5h**.



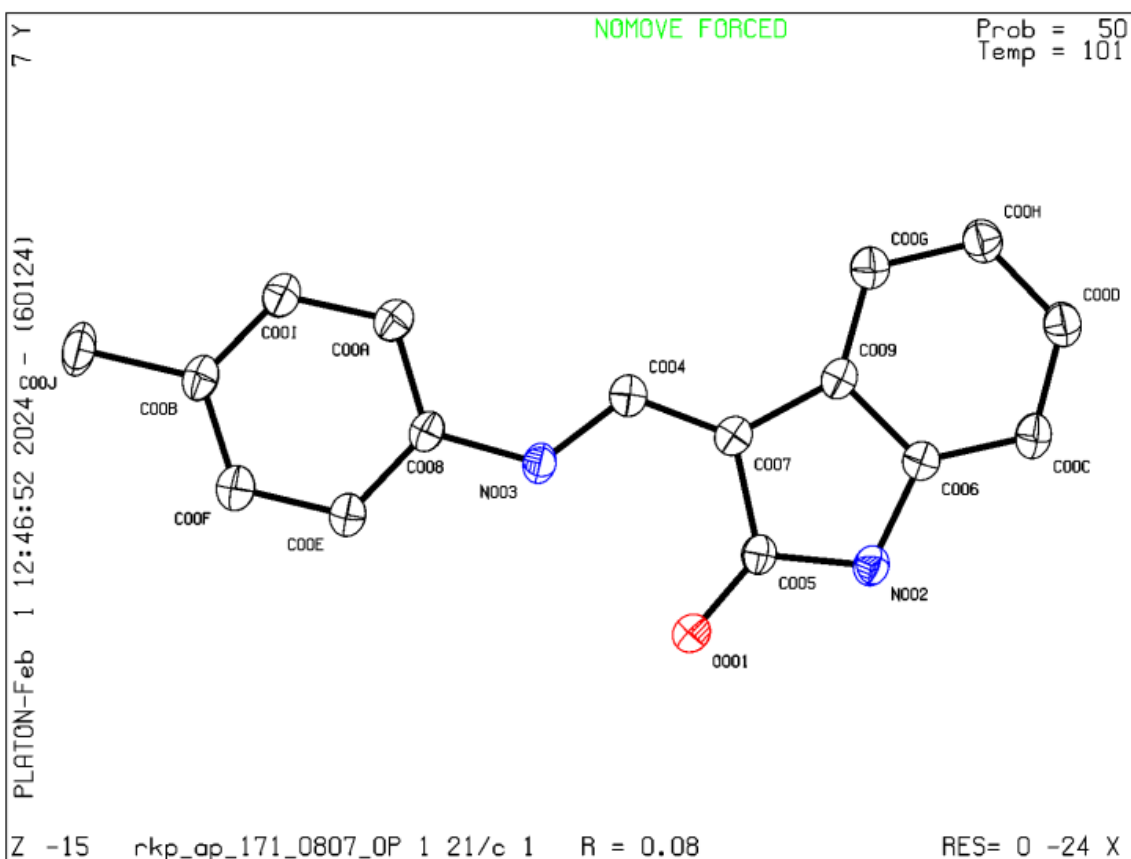

|                    |                                                  |
|--------------------|--------------------------------------------------|
| Formula            | C <sub>16</sub> H <sub>14</sub> N <sub>2</sub> O |
| Formula Wt.        | 250.29                                           |
| Crystal color      | yellow                                           |
| Crystal system     | Needle shape                                     |
| Space group        | P21/c                                            |
| a(Å)               | 14.0955(6)                                       |
| b(Å)               | 6.0166(3)                                        |
| c(Å)               | 15.1711(7)                                       |
| α(deg)             | 90                                               |
| β(deg)             | 103.195(1)                                       |
| γ(deg)             | 90                                               |
| V(Å <sup>3</sup> ) | 1252.65(10)                                      |

**Figure S4:** ORTEP plot of the crystal structure of **5i**.

## Computational Studies:

All the computational studies were done using density functional theory (DFT) method in ORCA program. Density functional theory has been performed to study the optimized energies of the molecule. The molecular properties of the compounds had been computed by DFT using the standard def2-SVP basis sets. The geometry optimization was performed at the B3LYP hybrid density functional with the same basis set with a dispersion correction D3BJ at 298 K temperature.

The structures and energies of configurations of arylthio/arylamino methylene derivatives were calculated on this basis set in ORCA program. Gibbs free energy for each *E* and *Z* structure, as well as optimized structures with single-point energies and relative frequencies, are provided by the DFT calculation. In order to investigate the effect of solvent on the isomeric composition, the structures were optimized in the solvent phase at B3LYP/def2-SVP level of theory using solvation model Conductor-like Polarizable Continuum Model (CPCM) with methanol solvent. Also, we have computed the solvent effect on energies by optimizing the structures and were used CPCM for the calculation of single point energies of methanol solvent.

In this investigation, theoretical calculation of molecules had been performed to have an idea about the lowest energy structures of the species *i.e.*, more stable structure. From the theoretical values obtained in this work, we can find that the optimized bond lengths and angles for molecule are in good agreement with the experimental values from single crystal XRD analysis.

### Coordinates of 3d (*E*-Isomer)

|   |              |             |              |
|---|--------------|-------------|--------------|
| C | 0.937047000  | 0.720554000 | -3.911536000 |
| C | -0.224548000 | 0.421695000 | -3.227324000 |
| C | 2.155183000  | 0.747302000 | -3.180749000 |
| C | -1.653927000 | 0.304626000 | -3.655202000 |
| H | 3.082983000  | 0.984225000 | -3.707659000 |
| C | -0.176888000 | 0.153123000 | -1.841637000 |
| C | 2.203059000  | 0.481413000 | -1.817268000 |
| H | 3.161422000  | 0.511030000 | -1.291410000 |
| C | 1.017510000  | 0.169697000 | -1.092174000 |

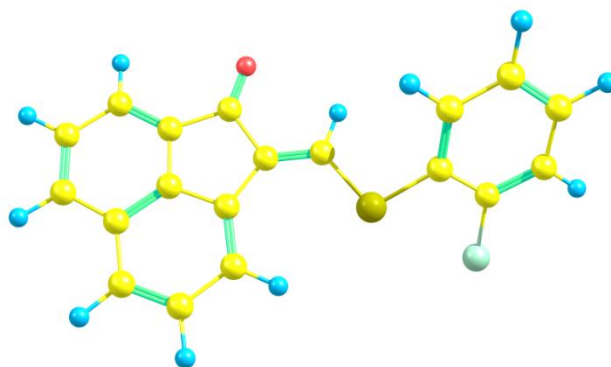

|   |              |              |              |
|---|--------------|--------------|--------------|
| H | 0.918837000  | 0.930914000  | -4.983392000 |
| C | -1.461498000 | -0.134797000 | -1.291918000 |
| C | -2.426345000 | -0.055916000 | -2.396648000 |
| C | -1.542393000 | -0.414482000 | 0.061325000  |
| C | 0.896463000  | -0.127062000 | 0.297472000  |
| H | -2.495091000 | -0.640477000 | 0.543195000  |
| H | 1.786396000  | -0.130746000 | 0.932214000  |
| C | -0.347677000 | -0.408075000 | 0.838460000  |
| H | -0.423429000 | -0.632186000 | 1.905604000  |
| O | -2.118671000 | 0.451160000  | -4.766832000 |
| S | -4.790782000 | -0.581816000 | -1.099115000 |
| C | -3.761752000 | -0.253749000 | -2.463197000 |
| H | -4.239693000 | -0.138665000 | -3.442129000 |
| C | -7.387825000 | -2.443925000 | -3.658203000 |
| C | -8.615746000 | -2.253669000 | -3.018901000 |
| C | -6.215628000 | -1.947847000 | -3.087209000 |
| H | -9.535659000 | -2.645264000 | -3.458715000 |
| H | -5.256753000 | -2.128361000 | -3.575559000 |
| C | -8.668431000 | -1.566587000 | -1.805218000 |
| C | -6.254315000 | -1.230042000 | -1.881050000 |
| H | -9.615016000 | -1.411279000 | -1.285165000 |
| C | -7.496447000 | -1.058076000 | -1.240939000 |

|    |              |              |             |
|----|--------------|--------------|-------------|
| Cl | -7.591981000 | -0.205842000 | 0.279677000 |
| H  | -7.335592000 | -2.993516000 | -4.60068500 |

**Coordinates of 3d (Z-Isomer)**

|   |              |              |              |
|---|--------------|--------------|--------------|
| C | 0.692812000  | 1.492260000  | -2.059514000 |
| C | -0.321542000 | 0.655181000  | -1.638956000 |
| C | 1.802087000  | 1.685525000  | -1.192652000 |
| C | -1.611561000 | 0.220386000  | -2.260625000 |
| H | 2.612708000  | 2.345862000  | -1.511342000 |
| C | -0.233267000 | 0.021975000  | -0.378772000 |
| C | 1.888110000  | 1.063199000  | 0.047513000  |
| H | 2.759124000  | 1.240359000  | 0.684559000  |
| C | 0.853930000  | 0.195917000  | 0.502244000  |
| H | 0.643794000  | 1.991711000  | -3.029883000 |
| C | -1.361829000 | -0.803065000 | -0.102148000 |
| C | -2.259269000 | -0.702971000 | -1.264625000 |
| C | -1.395900000 | -1.474531000 | 1.105437000  |
| C | 0.786206000  | -0.512434000 | 1.738145000  |
| H | -2.234133000 | -2.120888000 | 1.377969000  |
| H | 1.597420000  | -0.418853000 | 2.464761000  |
| C | -0.309307000 | -1.315414000 | 2.014012000  |
| H | -0.347390000 | -1.850492000 | 2.966518000  |

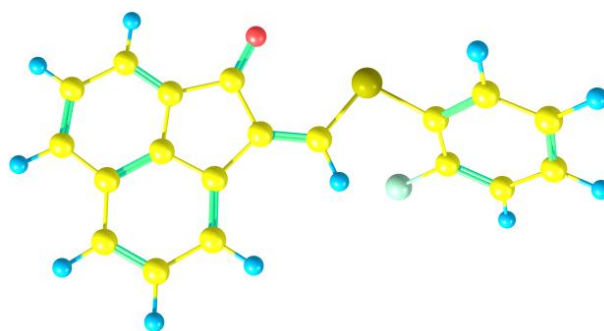

|    |              |              |              |
|----|--------------|--------------|--------------|
| O  | -2.071126000 | 0.526530000  | -3.345878000 |
| S  | -4.428013000 | -1.076948000 | -2.905959000 |
| C  | -3.458052000 | -1.296696000 | -1.467505000 |
| H  | -3.883969000 | -1.958953000 | -0.709837000 |
| C  | -7.310890000 | -3.924419000 | -3.124946000 |
| C  | -8.148486000 | -3.643207000 | -2.042485000 |
| C  | -6.169297000 | -3.150284000 | -3.336259000 |
| H  | -9.041713000 | -4.246267000 | -1.863288000 |
| H  | -5.498985000 | -3.367979000 | -4.170688000 |
| C  | -7.849040000 | -2.585417000 | -1.182624000 |
| C  | -5.848165000 | -2.083172000 | -2.482962000 |
| H  | -8.496353000 | -2.348141000 | -0.336858000 |
| C  | -6.714306000 | -1.800511000 | -1.409172000 |
| Cl | -6.399631000 | -0.470777000 | -0.322539000 |
| H  | -7.540272000 | -4.750673000 | -3.801506000 |

For both the isomers of **3d**, we have performed theoretical calculations. Optimizing the coordinates revealed that *E*-isomer possesses less optimized energy and less Gibbs free energy, so is more stable than *Z*-isomer as data shown in below table:

| S.No. | Isomer   | Compound (3d)                                                                     | E(a.u.)         | GFE(a.u.)      | Esolvent(a.u.)   |
|-------|----------|-----------------------------------------------------------------------------------|-----------------|----------------|------------------|
| 1     | <i>E</i> | 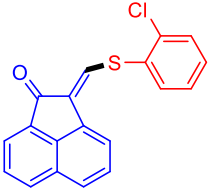 | -1662.913655744 | -1662.71579355 | -1662.9256569453 |
| 2     | <i>Z</i> |  | -1662.911814293 | -1662.71349097 | -1662.9253050682 |

### Coordinates of 3j (*E*-Isomer)

|   |              |              |              |
|---|--------------|--------------|--------------|
| C | -0.895682000 | -0.480389000 | -7.118570000 |
| C | -0.453305000 | -0.534044000 | -5.796046000 |
| C | -1.027512000 | 0.331923000  | -4.828404000 |
| C | -2.029473000 | 1.237270000  | -5.160384000 |
| C | -2.457435000 | 1.277848000  | -6.497104000 |
| C | -1.900524000 | 0.435172000  | -7.464604000 |
| C | 0.550721000  | -1.334215000 | -5.102742000 |
| C | 0.533645000  | -0.898806000 | -3.665008000 |
| N | -0.429543000 | 0.107389000  | -3.583831000 |
| H | -0.467747000 | -1.138818000 | -7.876592000 |
| H | -2.478361000 | 1.884820000  | -4.406626000 |
| H | -3.245577000 | 1.979615000  | -6.781185000 |
| H | -2.253937000 | 0.485588000  | -8.496861000 |
| O | 1.204865000  | -1.307584000 | -2.737090000 |
| C | 1.415558000  | -2.294234000 | -5.502965000 |
| S | 1.530057000  | -2.934425000 | -7.117319000 |
| C | -2.161929000 | 0.526237000  | -1.864021000 |
| C | -2.963080000 | 1.569220000  | -1.384022000 |
| C | -2.678221000 | -0.777171000 | -1.873164000 |
| H | -2.572002000 | 2.591178000  | -1.380755000 |
| H | -2.061520000 | -1.596483000 | -2.251064000 |

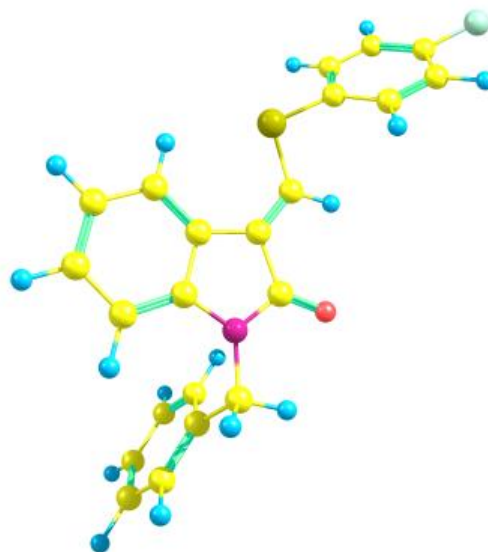

|    |              |              |              |
|----|--------------|--------------|--------------|
| C  | -4.256046000 | 1.317756000  | -0.914367000 |
| C  | -3.969597000 | -1.030893000 | -1.408218000 |
| H  | -4.870314000 | 2.142728000  | -0.544569000 |
| H  | -4.360101000 | -2.051678000 | -1.421357000 |
| C  | -4.762960000 | 0.016230000  | -0.926793000 |
| H  | -5.775032000 | -0.182751000 | -0.565528000 |
| C  | -0.753377000 | 0.797640000  | -2.355224000 |
| H  | -0.013899000 | 0.446067000  | -1.618029000 |
| H  | -0.604612000 | 1.883040000  | -2.486871000 |
| C  | 3.042491000  | -3.876268000 | -7.031990000 |
| C  | 4.249043000  | -5.888998000 | -7.648231000 |
| H  | 4.192031000  | -2.382561000 | -5.958775000 |
| C  | 5.367893000  | -4.133634000 | -6.393776000 |
| H  | 2.174402000  | -5.532353000 | -8.121642000 |
| C  | 3.075409000  | -5.134568000 | -7.649304000 |
| H  | 4.280221000  | -6.870572000 | -8.123550000 |
| C  | 4.198678000  | -3.373475000 | -6.416981000 |
| C  | 5.388550000  | -5.387432000 | -7.012641000 |
| H  | 6.268341000  | -3.752179000 | -5.909857000 |
| Cl | 6.853172000  | -6.335173000 | -6.992567000 |
| H  | 2.080833000  | -2.728102000 | -4.748893000 |



### Coordinates of 3j (Z-Isomer)

|   |              |              |              |
|---|--------------|--------------|--------------|
| C | -1.473767000 | 0.340430000  | -7.370436000 |
| C | -0.942654000 | -0.096317000 | -6.157935000 |
| C | -1.251805000 | 0.602856000  | -4.963044000 |
| C | -2.085053000 | 1.717391000  | -4.963120000 |
| C | -2.608525000 | 2.141776000  | -6.194207000 |
| C | -2.308749000 | 1.466322000  | -7.383288000 |
| C | -0.060954000 | -1.201202000 | -5.785683000 |
| C | 0.126995000  | -1.118156000 | -4.308377000 |
| N | -0.603250000 | -0.009367000 | -3.883713000 |
| H | -1.244887000 | -0.187680000 | -8.299813000 |
| H | -2.334358000 | 2.236508000  | -4.036990000 |
| H | -3.266310000 | 3.014057000  | -6.219721000 |
| H | -2.731123000 | 1.816908000  | -8.327653000 |
| O | 0.777887000  | -1.859612000 | -3.592665000 |
| C | 0.511329000  | -2.156885000 | -6.556603000 |
| S | 1.527468000  | -3.438323000 | -5.946446000 |
| C | -2.067891000 | 0.269282000  | -1.904168000 |
| C | -2.592343000 | 1.276549000  | -1.085090000 |
| C | -2.838578000 | -0.875777000 | -2.149466000 |
| H | -2.001912000 | 2.177960000  | -0.894957000 |
| H | -2.440468000 | -1.664516000 | -2.792823000 |

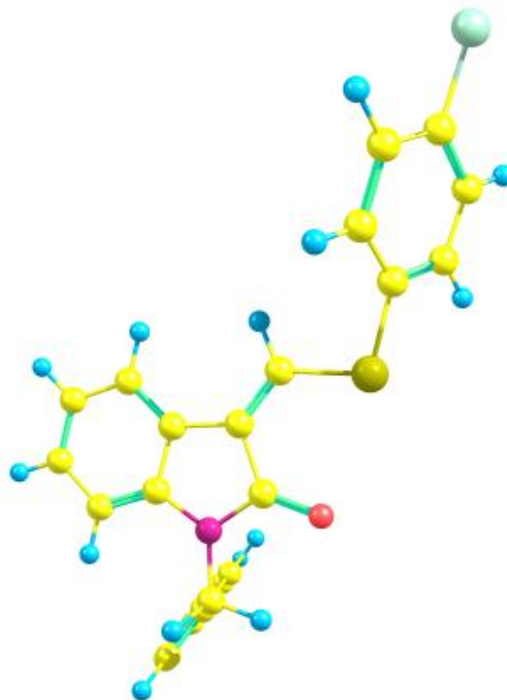

|    |              |              |               |
|----|--------------|--------------|---------------|
| C  | -3.861019000 | 1.142604000  | -0.512702000  |
| C  | -4.106909000 | -1.010695000 | -1.582308000  |
| H  | -4.257182000 | 1.938037000  | 0.123736000   |
| H  | -4.697885000 | -1.908350000 | -1.781481000  |
| C  | -4.622148000 | -0.002029000 | -0.761081000  |
| H  | -5.616059000 | -0.107646000 | -0.319070000  |
| C  | -0.680923000 | 0.406953000  | -2.501646000  |
| H  | 0.034803000  | -0.233702000 | -1.961686000  |
| H  | -0.333714000 | 1.449854000  | -2.405655000  |
| C  | 2.030490000  | -4.206792000 | -7.481675000  |
| C  | 2.393587000  | -6.258882000 | -8.729384000  |
| H  | 2.668429000  | -2.385789000 | -8.469549000  |
| C  | 2.994712000  | -4.117278000 | -9.708374000  |
| H  | 1.528222000  | -6.180038000 | -6.753986000  |
| C  | 1.950708000  | -5.603149000 | -7.579811000  |
| H  | 2.329518000  | -7.345031000 | -8.811071000  |
| C  | 2.568712000  | -3.470584000 | -8.548113000  |
| C  | 2.909017000  | -5.510731000 | -9.791378000  |
| H  | 3.410469000  | -3.549233000 | -10.542107000 |
| Cl | 3.457115000  | -6.323809000 | -11.235408000 |
| H  | 0.334396000  | -2.169695000 | -7.635883000  |

Structure optimization of both *E* and *Z* isomers of **3j** compound concluded that *E*-isomer of **3j** is more favorable which was also confirmed by its crystal structure.

| S.No. | Isomer   | Compound ( <b>3j</b> )                                                            | E (a.u.)        | GFE (a.u.)     | E <sub>solvent</sub> (a.u.) |
|-------|----------|-----------------------------------------------------------------------------------|-----------------|----------------|-----------------------------|
| 1     | <i>E</i> | 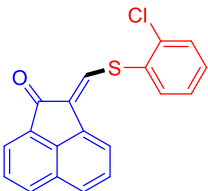 | -1834.798960279 | -1834.52584765 | -1834.8140728130            |
| 2     | <i>Z</i> |  | -1834.796965032 | -1834.52496011 | -1834.8132684436            |

### Coordinates of 5h (*E*-Isomer)

|   |              |              |              |
|---|--------------|--------------|--------------|
| C | 1.215155000  | 0.284250000  | -2.457349000 |
| C | -0.070408000 | 0.054769000  | -2.009221000 |
| C | 2.236951000  | 0.475753000  | -1.488893000 |
| C | -1.368638000 | -0.187170000 | -2.721163000 |
| H | 3.259948000  | 0.658339000  | -1.827886000 |
| C | -0.335665000 | 0.013493000  | -0.623730000 |
| C | 1.975079000  | 0.439501000  | -0.124387000 |
| H | 2.788785000  | 0.594660000  | 0.589565000  |
| C | 0.656290000  | 0.203811000  | 0.359147000  |
| H | 1.438811000  | 0.318071000  | -3.526203000 |
| C | -1.714553000 | -0.237179000 | -0.341098000 |
| C | -2.391903000 | -0.373036000 | -1.636508000 |
| C | -2.091206000 | -0.285977000 | 0.991235000  |
| C | 0.226577000  | 0.138820000  | 1.718322000  |
| H | -3.124322000 | -0.455752000 | 1.306262000  |
| H | 0.948989000  | 0.278471000  | 2.526509000  |
| C | -1.106596000 | -0.097395000 | 2.005503000  |
| H | -1.426031000 | -0.140569000 | 3.050018000  |
| O | -1.561754000 | -0.227934000 | -3.922416000 |
| C | -7.919361000 | -1.133596000 | -2.983043000 |
| C | -8.800241000 | -1.535526000 | -1.972223000 |

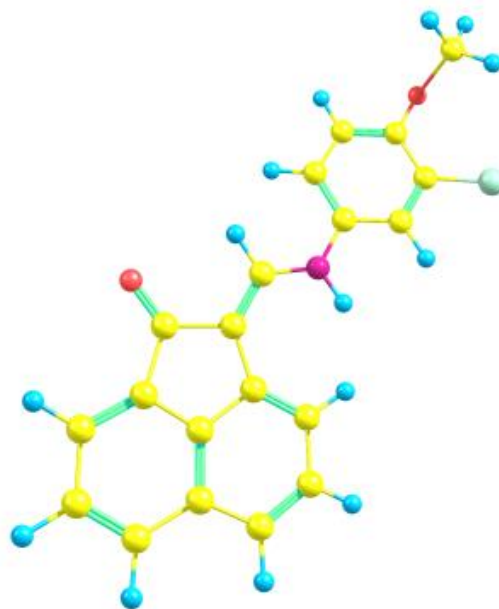

|    |               |              |              |
|----|---------------|--------------|--------------|
| C  | -6.569613000  | -0.895830000 | -2.731955000 |
| H  | -5.927003000  | -0.561030000 | -3.545911000 |
| C  | -8.278528000  | -1.702713000 | -0.676558000 |
| C  | -6.057914000  | -1.076199000 | -1.435457000 |
| Cl | -9.335261000  | -2.180846000 | 0.626328000  |
| C  | -6.929186000  | -1.479732000 | -0.410023000 |
| H  | -6.560685000  | -1.624348000 | 0.607704000  |
| H  | -8.329022000  | -0.990065000 | -3.985182000 |
| O  | -10.122616000 | -1.709590000 | -2.247524000 |
| C  | -10.543032000 | -3.053281000 | -2.442254000 |
| H  | -10.018142000 | -3.513975000 | -3.298925000 |
| H  | -10.370231000 | -3.666677000 | -1.541874000 |
| H  | -11.620725000 | -3.022330000 | -2.653773000 |
| N  | -4.712740000  | -0.861708000 | -1.113182000 |
| C  | -3.686535000  | -0.627263000 | -1.970803000 |
| H  | -3.918353000  | -0.660873000 | -3.038634000 |
| H  | -4.484857000  | -0.918721000 | -0.127761000 |

### Coordinates of 5h (Z-Isomer)

|   |              |              |              |
|---|--------------|--------------|--------------|
| C | 0.447093000  | 0.637860000  | -2.515159000 |
| C | -0.569644000 | 0.200442000  | -1.688583000 |
| C | 1.721608000  | 0.878205000  | -1.934869000 |
| C | -2.003649000 | -0.148519000 | -1.926795000 |
| H | 2.537000000  | 1.224175000  | -2.575245000 |
| C | -0.320253000 | 0.006779000  | -0.311229000 |
| C | 1.964289000  | 0.687740000  | -0.578893000 |
| H | 2.960538000  | 0.885299000  | -0.173296000 |
| C | 0.931151000  | 0.238152000  | 0.292227000  |
| H | 0.277184000  | 0.794768000  | -3.582877000 |
| C | -1.478800000 | -0.444871000 | 0.387542000  |
| C | -2.553665000 | -0.554158000 | -0.605969000 |
| C | -1.364078000 | -0.668407000 | 1.747444000  |
| C | 1.013072000  | -0.003844000 | 1.696384000  |
| H | -2.211216000 | -1.013010000 | 2.346235000  |
| H | 1.956519000  | 0.157134000  | 2.224108000  |
| C | -0.107511000 | -0.441390000 | 2.383290000  |
| H | -0.032206000 | -0.622251000 | 3.458864000  |
| O | -2.618779000 | -0.112073000 | -2.992972000 |
| C | -8.157683000 | -1.623805000 | -2.671592000 |
| C | -8.811237000 | -2.087279000 | -1.523217000 |

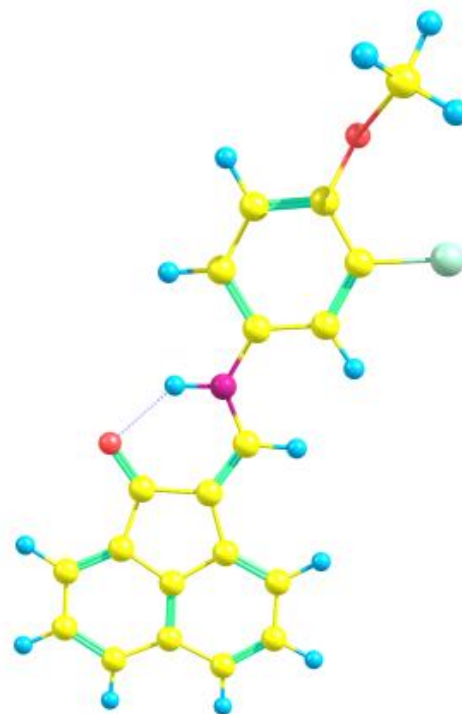

|    |               |              |              |
|----|---------------|--------------|--------------|
| C  | -6.814623000  | -1.260862000 | -2.645569000 |
| H  | -6.327998000  | -0.894125000 | -3.552510000 |
| C  | -8.062037000  | -2.181507000 | -0.336561000 |
| C  | -6.073067000  | -1.362476000 | -1.454298000 |
| Cl | -8.836429000  | -2.742600000 | 1.124539000  |
| C  | -6.713714000  | -1.828460000 | -0.293901000 |
| H  | -6.186786000  | -1.924900000 | 0.654245000  |
| H  | -8.739773000  | -1.542964000 | -3.592032000 |
| O  | -10.138312000 | -2.391751000 | -1.568345000 |
| C  | -10.453650000 | -3.772597000 | -1.684985000 |
| H  | -10.030714000 | -4.200023000 | -2.612408000 |
| H  | -10.081069000 | -4.348014000 | -0.820786000 |
| H  | -11.549298000 | -3.847242000 | -1.719977000 |
| N  | -4.729826000  | -0.988943000 | -1.475968000 |
| C  | -3.856599000  | -0.947136000 | -0.444561000 |
| H  | -4.231082000  | -1.240734000 | 0.539455000  |
| H  | -4.316874000  | -0.692794000 | -2.370557000 |

By optimizing both the *E* and *Z* isomers of **5h** compound, *Z*-isomer of **5h** was found to be more favorable according to optimized energy, Gibb's free energy and also by crystal structure analysis.

| S.No. | Isomer   | Compound (5h)                                                                     | E (a.u.)      | GFE (a.u.)    | E <sub>solvent</sub> (a.u.) |
|-------|----------|-----------------------------------------------------------------------------------|---------------|---------------|-----------------------------|
| 1     | <i>E</i> | 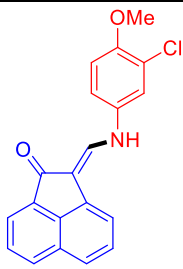 | -1434.5680019 | -1434.3246832 | -1434.5874193               |
| 2     | <i>Z</i> |  | -1434.5769975 | -1434.3331589 | -1434.5920011               |

The DFT calculations and single crystal XRD studies reveal hydrogen bonding between carbonyl oxygen and N–H of enamine leading to *Z*-isomer predominantly.



### Coordinates of 5i (*E*-isomer)

|   |              |              |              |
|---|--------------|--------------|--------------|
| C | -0.770457000 | -0.872742000 | -7.167731000 |
| C | -0.233653000 | -0.672754000 | -5.892915000 |
| C | -0.916678000 | 0.191187000  | -4.989189000 |
| C | -2.101602000 | 0.829949000  | -5.338413000 |
| C | -2.621794000 | 0.606793000  | -6.622619000 |
| C | -1.965358000 | -0.232438000 | -7.528045000 |
| C | 0.952463000  | -1.152668000 | -5.192353000 |
| C | 0.952015000  | -0.532524000 | -3.837343000 |
| N | -0.202438000 | 0.252085000  | -3.797455000 |
| H | -0.276093000 | -1.514415000 | -7.902037000 |
| H | -2.612949000 | 1.489288000  | -4.633173000 |
| H | -3.551924000 | 1.099559000  | -6.916145000 |
| H | -2.383119000 | -0.389797000 | -8.524970000 |
| O | 1.756656000  | -0.655059000 | -2.932392000 |
| C | 1.960704000  | -2.005538000 | -5.531465000 |
| N | 2.094596000  | -2.677103000 | -6.699577000 |
| C | 3.138950000  | -3.532108000 | -7.079868000 |
| C | 4.047187000  | -5.075734000 | -8.723394000 |
| H | 4.410238000  | -3.211074000 | -5.343180000 |
| C | 5.286805000  | -4.597724000 | -6.728865000 |
| H | 2.146152000  | -4.073743000 | -8.924682000 |
| C | 3.034024000  | -4.215657000 | -8.301295000 |
| H | 3.938101000  | -5.595956000 | -9.678944000 |
| C | 4.286630000  | -3.731419000 | -6.293278000 |
| C | 5.195694000  | -5.287703000 | -7.948615000 |

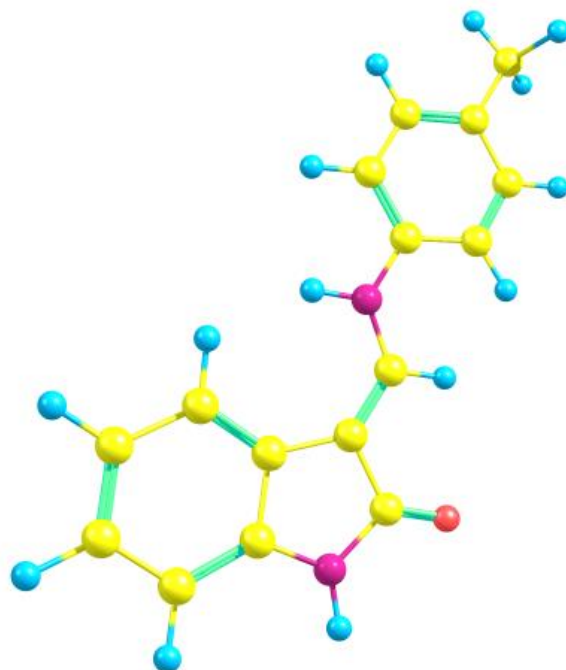

|   |              |              |              |
|---|--------------|--------------|--------------|
| H | 6.170122000  | -4.737690000 | -6.099052000 |
| H | 2.734016000  | -2.167888000 | -4.776484000 |
| H | -0.457854000 | 0.795470000  | -2.982909000 |
| H | 1.349387000  | -2.574843000 | -7.378416000 |
| C | 6.301368000  | -6.207195000 | -8.401812000 |
| H | 6.546330000  | -6.953591000 | -7.628117000 |
| H | 6.025386000  | -6.749538000 | -9.318315000 |
| H | 7.228152000  | -5.646242000 | -8.612455000 |

### Coordinates of 5i (Z- isomer)

|   |              |              |                  |
|---|--------------|--------------|------------------|
| C | 0.822874000  | 0.774364000  | -3.474313000     |
| C | 1.840526000  | -0.181155000 | -3.506607000     |
| C | 2.799252000  | -0.209533000 | -2.457147000     |
| C | 2.753681000  | 0.689405000  | -1.397053000     |
| C | 1.723085000  | 1.641326000  | -1.384851000     |
| C | 0.769476000  | 1.683757000  | -2.409449000     |
| C | 2.198027000  | -1.250763000 | -4.428190000     |
| C | 3.401382000  | -1.911894000 | -3.885295000     |
| N | 3.705947000  | -1.241862000 | -2.710411000     |
| H | 0.074054000  | 0.815384000  | -4.269906000     |
| H | 3.497651000  | 0.656921000  | -0.597494000 aw2 |
| H | 1.666952000  | 2.357835000  | -0.561789000     |
| H | -0.024636000 | 2.433460000  | -2.378664000     |
| O | 4.029847000  | -2.861469000 | -4.355032000     |
| C | 1.619762000  | -1.658487000 | -5.603636000     |
| N | 2.111569000  | -2.682148000 | -6.331985000     |

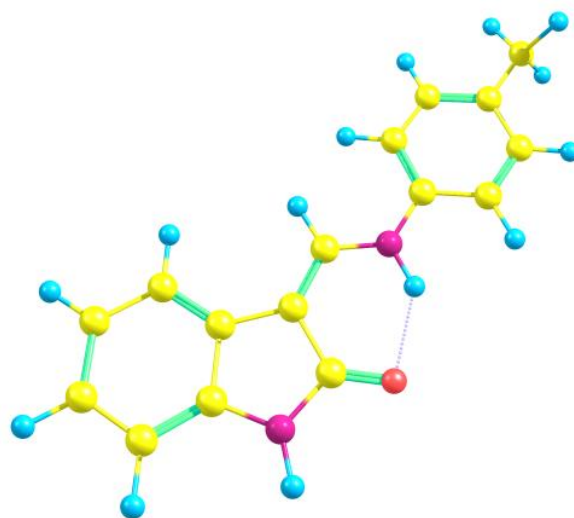

|   |              |              |               |
|---|--------------|--------------|---------------|
| C | 1.625119000  | -3.192683000 | -7.538712000  |
| C | 0.007047000  | -3.309495000 | -9.342690000  |
| H | 3.306385000  | -4.539536000 | -7.736231000  |
| C | 1.937090000  | -4.730446000 | -9.394376000  |
| H | -0.189773000 | -1.998983000 | -7.651803000  |
| C | 0.428121000  | -2.759714000 | -8.130776000  |
| H | -0.929556000 | -2.956830000 | -9.783796000  |
| C | 2.373530000  | -4.191741000 | -8.188121000  |
| C | 0.745934000  | -4.300668000 | -10.002852000 |
| H | 2.539145000  | -5.505286000 | -9.877835000  |
| H | 0.734359000  | -1.148752000 | -5.990806000  |
| H | 4.494670000  | -1.493850000 | -2.128313000  |
| H | 2.955346000  | -3.107061000 | -5.923445000  |
| C | 0.294165000  | -4.882164000 | -11.318431000 |
| H | 0.263508000  | -5.983823000 | -11.282608000 |
| H | -0.709481000 | -4.525228000 | -11.593445000 |
| H | 0.982353000  | -4.606117000 | -12.136083000 |

By optimizing both the *E* and *Z* isomers of **5i** compound, *Z*-isomer of **5i** was found to be more favorable according to optimized energy, Gibb's free energy and also by crystal structure analysis.

| S.No. | Isomer   | Compound <b>5i</b>                                                                | E (a.u.)     | GFE (a.u.)   | E <sub>solvent</sub> (a.u.) |
|-------|----------|-----------------------------------------------------------------------------------|--------------|--------------|-----------------------------|
| 1     | <i>E</i> | 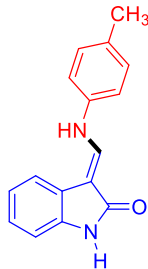 | -801.9040699 | -801.6810268 | -801.92397833               |
| 2     | <i>Z</i> |  | -801.9126937 | -801.6881056 | -801.9282757                |

The DFT calculations and single crystal XRD studies reveal hydrogen bonding between carbonyl oxygen and N–H of enamine leading to *Z*-isomer predominantly.
